# Supplementary material for: Comprehensive Analyses Identify APOBEC3A as a Genomic Instability-Associated Immune Prognostic Biomarker in Ovarian Cancer
Source: PubMed Central journal article supplement (PMC8568129; doi:10.3389/fimmu.2021.749369), 2021-10-21
Supplement: DataSheet_1.pdf [file DataSheet_1.pdf]

## *Supplementary Material*

### 1.1 Supplementary Tables

**Table S1.** Clinical information of patients in TCGA-OV and ICGC OV-AU datasets.

| Clinical Parameters | Subtype | TCGA-OV Samples | ICGC OV-AU Samples |
|---------------------|---------|-----------------|--------------------|
| Age                 | <60     | 190             | 50                 |
|                     | ≥60     | 171             | 43                 |
| Stage               | I       | 1               | /                  |
|                     | II      | 21              | /                  |
|                     | III     | 286             | 79                 |
|                     | IV      | 53              | 14                 |
| OS times (months)   | <12     | 62              | 11                 |
|                     | ≥12     | 299             | 82                 |

Notes: TCGA, The Cancer Genome Atlas; ICGC, International Cancer Genome Consortium; OS, Overall survival.

**Table S2.** The results of immune-related differentially expressed genes (DEGs).

| Gene       | conMean  | treatMean | logFC    | pValue   | FDR      |
|------------|----------|-----------|----------|----------|----------|
| TSPEAR     | 0.359972 | 0.136653  | -1.39737 | 2.64E-08 | 2.49E-07 |
| SYCP2L     | 0.207928 | 0.100134  | -1.05415 | 0.00028  | 0.000979 |
| CDHR4      | 1.745065 | 0.613497  | -1.50815 | 0.009826 | 0.021175 |
| SULT1C2    | 1.621802 | 1.030727  | -0.65394 | 2.87E-05 | 0.000132 |
| SLC9A9     | 0.738347 | 1.597264  | 1.113231 | 1.05E-30 | 4.82E-29 |
| CD68       | 0.794459 | 1.856841  | 1.224806 | 2.68E-36 | 1.78E-34 |
| NPM2       | 0.592847 | 0.257861  | -1.20106 | 3.05E-07 | 2.32E-06 |
| ST6GALNAC3 | 0.683108 | 0.360941  | -0.92035 | 8.00E-06 | 4.29E-05 |
| OSMR       | 6.433393 | 11.6608   | 0.858015 | 1.91E-13 | 3.51E-12 |
| CFAP70     | 0.819098 | 0.524898  | -0.642   | 1.74E-05 | 8.48E-05 |
| FBN3       | 4.852862 | 1.73253   | -1.48596 | 1.63E-12 | 2.72E-11 |
| ZNF99      | 0.208317 | 0.117077  | -0.83132 | 1.79E-06 | 1.13E-05 |
| RSPH9      | 1.596742 | 0.904138  | -0.82052 | 0.001751 | 0.004786 |
| SEPTIN5    | 3.906884 | 2.421345  | -0.69021 | 1.01E-05 | 5.24E-05 |
| POSTN      | 9.570291 | 23.89095  | 1.319829 | 1.18E-10 | 1.59E-09 |
| NHLRC4     | 0.998503 | 0.611544  | -0.70731 | 0.000512 | 0.001652 |
| C1orf158   | 0.863978 | 0.302027  | -1.51632 | 8.86E-06 | 4.68E-05 |
| CCDC81     | 0.497545 | 0.183069  | -1.44244 | 3.81E-05 | 0.000169 |
| TMIGD2     | 0.100914 | 0.436627  | 2.113274 | 3.79E-34 | 2.18E-32 |
| TTC25      | 1.566488 | 0.847449  | -0.88633 | 1.04E-10 | 1.41E-09 |
| ABCA6      | 0.092077 | 0.160569  | 0.802274 | 3.21E-07 | 2.43E-06 |

| Gene     | conMean  | treatMean | logFC    | pValue   | FDR      |
|----------|----------|-----------|----------|----------|----------|
| CFAP100  | 1.188425 | 0.452378  | -1.39345 | 1.80E-07 | 1.44E-06 |
| FAM167A  | 1.479431 | 0.972842  | -0.60477 | 0.010086 | 0.021675 |
| MYOD1    | 1.210053 | 0.453719  | -1.4152  | 0.000317 | 0.001091 |
| SPIB     | 0.148787 | 0.29714   | 0.997895 | 1.80E-17 | 4.21E-16 |
| ZNF679   | 0.423219 | 0.194353  | -1.12272 | 4.11E-07 | 3.02E-06 |
| CHRNA4   | 0.173261 | 0.028442  | -2.60687 | 2.57E-09 | 2.94E-08 |
| CRISPLD1 | 3.126004 | 2.078664  | -0.58866 | 0.002533 | 0.006614 |
| SH2D5    | 0.194863 | 0.1117    | -0.80283 | 5.76E-06 | 3.20E-05 |
| NOG      | 1.668393 | 0.74132   | -1.17029 | 0.01956  | 0.037981 |
| PYCARD   | 9.606856 | 16.25206  | 0.758486 | 3.00E-18 | 7.24E-17 |
| AQP12B   | 0.20886  | 0.049051  | -2.0902  | 0.010249 | 0.021966 |
| PRR18    | 0.44793  | 0.204339  | -1.13231 | 0.005296 | 0.012471 |
| ITGAX    | 1.211358 | 3.352529  | 1.468624 | 1.13E-38 | 8.68E-37 |
| DLEU7    | 0.182702 | 0.320521  | 0.810929 | 3.93E-16 | 8.63E-15 |
| ADAMTS8  | 0.652421 | 0.261305  | -1.32007 | 1.36E-06 | 8.88E-06 |
| GPR82    | 0.313838 | 0.653048  | 1.057166 | 9.78E-22 | 2.75E-20 |
| TEKT4    | 0.739754 | 0.248409  | -1.57433 | 0.000522 | 0.00168  |
| EFCAB10  | 1.063362 | 0.448875  | -1.24425 | 2.10E-08 | 2.02E-07 |
| TFF2     | 2.65782  | 0.988331  | -1.42718 | 0.001107 | 0.003222 |
| WDR87    | 0.140138 | 0.072695  | -0.94692 | 3.38E-06 | 1.99E-05 |
| SLURP1   | 1.281996 | 2.536396  | 0.984388 | 0.011412 | 0.024102 |
| TNFSF13B | 2.22479  | 6.655539  | 1.580887 | 2.43E-44 | 3.70E-42 |
| DNAH12   | 0.232311 | 0.101018  | -1.20145 | 0.000488 | 0.001587 |
| REM2     | 1.028757 | 0.687687  | -0.58108 | 5.96E-06 | 3.30E-05 |
| WDR93    | 0.770642 | 0.469999  | -0.7134  | 1.58E-05 | 7.84E-05 |
| OASL     | 4.775295 | 7.447358  | 0.641139 | 8.51E-11 | 1.17E-09 |
| GRID2IP  | 0.654267 | 0.35457   | -0.88381 | 0.000447 | 0.00147  |
| CCDC173  | 1.379642 | 0.594608  | -1.21428 | 6.92E-12 | 1.08E-10 |
| SRGN     | 31.33119 | 90.16996  | 1.525047 | 1.21E-45 | 2.45E-43 |
| WDR63    | 0.582682 | 0.229291  | -1.34553 | 0.0007   | 0.002168 |
| MYLK3    | 0.26614  | 0.144514  | -0.88097 | 5.53E-05 | 0.000235 |
| C16orf54 | 0.327228 | 0.922793  | 1.49571  | 4.39E-37 | 3.05E-35 |
| CXCL5    | 1.39056  | 3.329877  | 1.259803 | 0.003342 | 0.008399 |
| JAKMIP2  | 0.327775 | 0.178165  | -0.87949 | 0.012452 | 0.025979 |
| CAMK1G   | 1.444418 | 0.83081   | -0.7979  | 0.000145 | 0.000548 |
| HTRA4    | 0.079615 | 0.226107  | 1.505893 | 2.04E-26 | 7.27E-25 |
| CMKLR1   | 1.030875 | 2.039123  | 0.984079 | 2.70E-21 | 7.42E-20 |
| INA      | 4.280601 | 1.475514  | -1.5366  | 0.000382 | 0.001282 |
| SLC16A11 | 1.700028 | 0.968261  | -0.81209 | 0.000268 | 0.000944 |
| ACTA2    | 36.94142 | 69.85329  | 0.919089 | 8.40E-10 | 1.03E-08 |
| GJA3     | 0.310623 | 0.516056  | 0.732362 | 0.00107  | 0.003128 |
| GIMAP6   | 1.42239  | 3.781833  | 1.410769 | 4.85E-41 | 4.61E-39 |
| NELL1    | 0.551908 | 0.100171  | -2.46197 | 8.14E-06 | 4.36E-05 |
| IL4R     | 3.452214 | 6.266343  | 0.860102 | 2.95E-18 | 7.13E-17 |
| IGFALS   | 1.200692 | 0.787409  | -0.60868 | 7.23E-06 | 3.92E-05 |

| Gene    | conMean  | treatMean | logFC    | pValue   | FDR      |
|---------|----------|-----------|----------|----------|----------|
| CDH11   | 3.857347 | 6.263828  | 0.699436 | 8.43E-06 | 4.48E-05 |
| MRC1    | 0.856743 | 2.157696  | 1.332557 | 5.47E-20 | 1.40E-18 |
| APOL2   | 10.77689 | 18.178    | 0.754253 | 3.58E-15 | 7.38E-14 |
| TUBA3D  | 1.481381 | 0.680325  | -1.12265 | 0.000839 | 0.002538 |
| LRRC34  | 0.727665 | 0.454949  | -0.67757 | 6.37E-06 | 3.49E-05 |
| ARL11   | 0.474171 | 0.948003  | 0.999485 | 7.38E-24 | 2.32E-22 |
| FMO1    | 0.979801 | 1.769672  | 0.852921 | 2.74E-09 | 3.11E-08 |
| CFAP74  | 0.278172 | 0.106928  | -1.37934 | 0.002214 | 0.005876 |
| AK7     | 1.313799 | 0.806666  | -0.7037  | 0.012617 | 0.026301 |
| GPC3    | 17.86385 | 5.60723   | -1.67168 | 0.000483 | 0.001573 |
| SLC7A10 | 0.730386 | 0.334114  | -1.12832 | 6.97E-05 | 0.000288 |
| MYBPHL  | 1.398241 | 0.843826  | -0.7286  | 0.002872 | 0.007381 |
| CFAP53  | 2.079232 | 1.382377  | -0.5889  | 2.22E-05 | 0.000105 |
| LYSMD2  | 4.153017 | 6.452333  | 0.635661 | 1.08E-15 | 2.30E-14 |
| PLPPR4  | 0.474594 | 0.880285  | 0.891277 | 1.45E-08 | 1.43E-07 |
| RBM24   | 1.765151 | 1.047076  | -0.75343 | 0.002653 | 0.006889 |
| SLC47A2 | 0.248627 | 0.161237  | -0.6248  | 0.000518 | 0.001669 |
| AGAP2   | 0.250178 | 0.525476  | 1.070671 | 4.01E-27 | 1.50E-25 |
| TAS2R19 | 0.188973 | 0.120665  | -0.64717 | 8.39E-06 | 4.47E-05 |
| RTN1    | 0.677128 | 1.337965  | 0.982538 | 5.62E-19 | 1.39E-17 |
| SLA     | 0.663194 | 1.99695   | 1.590296 | 2.07E-46 | 5.35E-44 |
| KRT16   | 1.966296 | 4.015537  | 1.030113 | 3.32E-08 | 3.06E-07 |
| ZNF850  | 1.313475 | 0.781996  | -0.74816 | 1.31E-06 | 8.62E-06 |
| DUSP9   | 3.229004 | 1.891371  | -0.77166 | 0.000505 | 0.001634 |
| GLIS1   | 0.80458  | 0.531362  | -0.59854 | 0.020104 | 0.038835 |
| TCTE1   | 0.428215 | 0.178998  | -1.25839 | 1.86E-05 | 8.98E-05 |
| TMEM59L | 1.699671 | 0.420564  | -2.01486 | 1.70E-11 | 2.52E-10 |
| ISM2    | 0.708925 | 0.328687  | -1.10892 | 4.03E-05 | 0.000178 |
| TRDN    | 0.234431 | 0.140046  | -0.74327 | 0.001905 | 0.00515  |
| CFAP57  | 0.919067 | 0.394427  | -1.22041 | 7.71E-07 | 5.36E-06 |
| CELSR3  | 0.895601 | 0.559958  | -0.67754 | 0.000337 | 0.001149 |
| HK3     | 0.57201  | 1.713771  | 1.583062 | 2.68E-36 | 1.78E-34 |
| LAG3    | 1.583582 | 3.970109  | 1.325986 | 5.99E-24 | 1.90E-22 |
| GRM4    | 0.4529   | 0.204996  | -1.1436  | 6.00E-07 | 4.26E-06 |
| ADGRF4  | 0.150498 | 0.312983  | 1.056343 | 1.39E-09 | 1.66E-08 |
| ZNF10   | 1.758573 | 1.123311  | -0.64665 | 6.27E-12 | 9.85E-11 |
| DOK3    | 1.30042  | 2.701841  | 1.054966 | 1.89E-34 | 1.13E-32 |
| COLEC12 | 2.024451 | 3.3099    | 0.709257 | 1.21E-10 | 1.63E-09 |
| FXYP6   | 8.507765 | 4.238782  | -1.00513 | 2.54E-07 | 1.97E-06 |
| LAT2    | 1.211704 | 3.25886   | 1.42733  | 5.74E-46 | 1.25E-43 |
| CIB4    | 0.187541 | 0.086839  | -1.11079 | 3.80E-06 | 2.21E-05 |
| OSM     | 0.877584 | 2.489129  | 1.504031 | 2.79E-24 | 9.03E-23 |
| RAB31   | 6.833693 | 12.85393  | 0.911472 | 1.88E-22 | 5.50E-21 |
| MYT1    | 0.578127 | 0.282475  | -1.03326 | 1.10E-06 | 7.34E-06 |
| SLC13A5 | 0.847678 | 0.515209  | -0.71836 | 0.015257 | 0.030825 |
| ARHGAP9 | 0.657939 | 2.039487  | 1.632181 | 7.64E-48 | 2.52E-45 |

| Gene       | conMean  | treatMean | logFC    | pValue   | FDR      |
|------------|----------|-----------|----------|----------|----------|
| NIBAN1     | 1.940315 | 3.536869  | 0.866182 | 7.63E-18 | 1.81E-16 |
| CYP11A1    | 1.741696 | 0.981306  | -0.82772 | 9.66E-06 | 5.05E-05 |
| EFR3B      | 0.63563  | 0.280742  | -1.17894 | 1.05E-11 | 1.60E-10 |
| WASF1      | 10.40096 | 5.694147  | -0.86917 | 5.21E-07 | 3.75E-06 |
| CD38       | 0.481399 | 1.563591  | 1.699558 | 5.51E-25 | 1.84E-23 |
| CD48       | 1.426227 | 5.638118  | 1.98301  | 1.05E-54 | 3.71E-51 |
| CCDC33     | 1.048416 | 0.657     | -0.67425 | 2.27E-06 | 1.40E-05 |
| ACVR2B     | 2.018164 | 1.236177  | -0.70716 | 3.44E-12 | 5.57E-11 |
| TGFBI      | 13.73598 | 29.79194  | 1.116962 | 4.75E-26 | 1.66E-24 |
| CXCL11     | 4.236244 | 13.6058   | 1.683364 | 2.65E-25 | 9.06E-24 |
| GZMB       | 1.122263 | 5.10075   | 2.184299 | 2.76E-33 | 1.48E-31 |
| SIX3       | 5.294023 | 1.383491  | -1.93605 | 4.67E-08 | 4.19E-07 |
| RAX2       | 0.271395 | 0.125109  | -1.1172  | 0.000253 | 0.000894 |
| ZBP1       | 0.72527  | 1.348409  | 0.894668 | 1.76E-13 | 3.26E-12 |
| KRT6B      | 0.379021 | 0.758772  | 1.001389 | 0.000815 | 0.002479 |
| LILRB4     | 1.25555  | 4.718977  | 1.910155 | 1.77E-48 | 6.86E-46 |
| PYGO1      | 0.686323 | 0.426546  | -0.68619 | 0.003156 | 0.007992 |
| SLC39A5    | 0.51232  | 0.115193  | -2.15299 | 2.09E-07 | 1.65E-06 |
| SCIMP      | 0.430953 | 1.241472  | 1.52645  | 1.08E-40 | 1.01E-38 |
| TMEM252    | 0.547946 | 0.147133  | -1.89691 | 0.021537 | 0.04116  |
| STRA6      | 5.052852 | 3.136311  | -0.68803 | 0.00289  | 0.007415 |
| COL28A1    | 0.448559 | 0.176096  | -1.34894 | 3.53E-05 | 0.000158 |
| C8orf34    | 0.184917 | 0.103988  | -0.83046 | 0.001658 | 0.004566 |
| NCF4       | 1.829447 | 4.95382   | 1.437134 | 1.74E-48 | 6.86E-46 |
| SV2A       | 3.231649 | 1.821512  | -0.82713 | 0.001435 | 0.004024 |
| TLR6       | 0.277459 | 0.599913  | 1.112478 | 6.29E-29 | 2.56E-27 |
| DUOX2      | 0.174044 | 0.112785  | -0.62587 | 0.013577 | 0.027978 |
| EFHC2      | 2.039692 | 1.258737  | -0.69637 | 0.000624 | 0.001962 |
| CABP1      | 0.13382  | 0.083935  | -0.67296 | 0.025681 | 0.04776  |
| LUM        | 49.60071 | 115.1115  | 1.214599 | 1.37E-11 | 2.05E-10 |
| LPAR5      | 1.893647 | 3.630532  | 0.939014 | 4.64E-22 | 1.33E-20 |
| HAVCR2     | 1.857386 | 5.838874  | 1.652417 | 3.45E-51 | 3.06E-48 |
| CACNA2D4   | 0.345709 | 0.620448  | 0.843753 | 1.11E-23 | 3.44E-22 |
| GLRX       | 1.343586 | 2.724406  | 1.019853 | 4.74E-38 | 3.55E-36 |
| AL645941.2 | 0.130883 | 0.27681   | 1.080614 | 7.69E-12 | 1.20E-10 |
| IL11RA     | 4.848528 | 3.072542  | -0.65811 | 0.007606 | 0.017003 |
| PCYT1B     | 0.454853 | 0.220687  | -1.0434  | 0.004004 | 0.009807 |
| MMP13      | 1.261966 | 3.665112  | 1.538184 | 1.85E-07 | 1.48E-06 |
| AIM2       | 0.370661 | 1.222511  | 1.721676 | 5.69E-36 | 3.70E-34 |
| GRIK4      | 0.44827  | 0.227441  | -0.97888 | 1.74E-05 | 8.48E-05 |
| GPR25      | 0.245158 | 0.586184  | 1.257639 | 5.41E-14 | 1.04E-12 |
| NEFH       | 5.032091 | 3.066963  | -0.71435 | 0.025558 | 0.047586 |
| HAS1       | 0.248396 | 0.569974  | 1.198254 | 0.000167 | 0.000623 |
| CCDC170    | 2.241059 | 1.412897  | -0.66552 | 0.000335 | 0.001146 |
| CSF1R      | 6.478676 | 19.9099   | 1.619715 | 2.43E-36 | 1.64E-34 |

| Gene     | conMean  | treatMean | logFC    | pValue   | FDR      |
|----------|----------|-----------|----------|----------|----------|
| STK17B   | 5.480969 | 8.341256  | 0.605834 | 3.26E-16 | 7.20E-15 |
| FN1      | 54.16565 | 124.3622  | 1.199097 | 1.73E-13 | 3.19E-12 |
| SLC18A3  | 0.770211 | 0.473139  | -0.70299 | 0.000119 | 0.00046  |
| SLC35D3  | 0.130246 | 0.401861  | 1.625458 | 2.64E-07 | 2.04E-06 |
| TMEM253  | 0.181386 | 0.095258  | -0.92914 | 3.70E-06 | 2.16E-05 |
| ADARB2   | 0.320169 | 0.096343  | -1.73258 | 1.60E-08 | 1.57E-07 |
| SCN4B    | 0.732173 | 0.460083  | -0.67029 | 0.002149 | 0.00572  |
| PLCB2    | 1.326873 | 2.488393  | 0.907184 | 3.86E-21 | 1.05E-19 |
| FBN1     | 2.367358 | 4.508605  | 0.929403 | 8.02E-08 | 6.89E-07 |
| TLR8     | 0.201793 | 0.83988   | 2.05731  | 9.26E-40 | 7.77E-38 |
| CD207    | 0.740893 | 1.669505  | 1.172084 | 0.008589 | 0.018886 |
| GPR1     | 0.39607  | 0.822857  | 1.054885 | 8.30E-10 | 1.02E-08 |
| TLR3     | 1.639173 | 2.594994  | 0.662763 | 1.85E-12 | 3.06E-11 |
| MCIDAS   | 1.081069 | 0.550438  | -0.97381 | 0.000814 | 0.002473 |
| GRID2    | 0.265557 | 0.094455  | -1.49133 | 3.15E-06 | 1.87E-05 |
| FZD10    | 9.095835 | 4.976811  | -0.86998 | 0.000104 | 0.000409 |
| ITGB6    | 2.492895 | 5.088306  | 1.029363 | 1.36E-10 | 1.82E-09 |
| PLEKHB1  | 17.47989 | 11.44819  | -0.61058 | 4.92E-07 | 3.56E-06 |
| NKAIN1   | 0.932152 | 0.421612  | -1.14465 | 5.33E-09 | 5.78E-08 |
| TMEM154  | 0.219166 | 0.391309  | 0.836282 | 1.53E-19 | 3.86E-18 |
| CERKL    | 0.819311 | 1.274913  | 0.637916 | 7.45E-22 | 2.11E-20 |
| SCGB1C1  | 0.949509 | 0.440021  | -1.10961 | 0.0033   | 0.008313 |
| FMO2     | 0.569739 | 1.799082  | 1.658889 | 2.16E-12 | 3.54E-11 |
| PPIL6    | 2.086622 | 1.390749  | -0.58531 | 4.99E-07 | 3.60E-06 |
| AKR7A3   | 1.261924 | 0.789808  | -0.67605 | 0.001854 | 0.005031 |
| FSTL4    | 0.748598 | 0.345101  | -1.11717 | 8.38E-07 | 5.77E-06 |
| B4GALNT3 | 4.704625 | 2.630667  | -0.83865 | 3.79E-10 | 4.86E-09 |
| NPY2R    | 0.213733 | 0.082285  | -1.3771  | 0.000908 | 0.002717 |
| CTXND1   | 0.740924 | 0.16175   | -2.19556 | 2.82E-09 | 3.21E-08 |
| SSC4D    | 4.287016 | 2.608462  | -0.71677 | 2.37E-09 | 2.73E-08 |
| IRAK2    | 1.378496 | 2.439542  | 0.823515 | 1.32E-12 | 2.23E-11 |
| MYO7B    | 0.674963 | 0.427651  | -0.65838 | 0.00748  | 0.016761 |
| FGFBP1   | 1.600229 | 2.618155  | 0.710272 | 0.006801 | 0.01545  |
| CCDC138  | 1.931283 | 1.25967   | -0.61651 | 1.04E-13 | 1.94E-12 |
| APOC2    | 0.111689 | 0.323885  | 1.535992 | 4.47E-26 | 1.56E-24 |
| GNAO1    | 1.751826 | 0.818261  | -1.09823 | 0.000449 | 0.001474 |
| TMIGD3   | 1.158603 | 2.925966  | 1.336527 | 8.68E-30 | 3.77E-28 |
| GBX2     | 0.164116 | 0.048152  | -1.76905 | 0.001274 | 0.003636 |
| SPI1     | 8.717976 | 26.95166  | 1.628309 | 3.87E-55 | 2.74E-51 |
| MYO5A    | 1.143941 | 1.772468  | 0.631747 | 5.88E-15 | 1.20E-13 |
| VENTX    | 0.196715 | 0.484737  | 1.301094 | 3.32E-23 | 1.01E-21 |
| S100A7A  | 0.19069  | 0.486179  | 1.350263 | 4.00E-07 | 2.95E-06 |
| MS4A14   | 0.187947 | 0.444912  | 1.243194 | 4.67E-23 | 1.41E-21 |
| HKDC1    | 3.944794 | 2.561576  | -0.62292 | 0.000298 | 0.001033 |
| PRSS33   | 11.85437 | 3.96802   | -1.57893 | 5.62E-05 | 0.000238 |
| DMBX1    | 0.759119 | 1.38032   | 0.862605 | 0.013398 | 0.027682 |

| Gene    | conMean  | treatMean | logFC    | pValue   | FDR      |
|---------|----------|-----------|----------|----------|----------|
| P2RX7   | 0.958485 | 1.812748  | 0.919351 | 4.71E-27 | 1.76E-25 |
| SLC3A1  | 0.323928 | 0.147312  | -1.1368  | 0.000105 | 0.000413 |
| FIGNL2  | 1.406401 | 0.864732  | -0.70168 | 0.00177  | 0.004835 |
| FCGBP   | 3.470674 | 6.827029  | 0.976042 | 2.15E-05 | 0.000102 |
| RSPH14  | 0.50574  | 0.271869  | -0.89548 | 8.56E-09 | 8.95E-08 |
| NOX4    | 1.320374 | 2.017255  | 0.611446 | 7.62E-06 | 4.12E-05 |
| MYLPF   | 5.520939 | 3.621628  | -0.60828 | 0.007113 | 0.016061 |
| CFAP44  | 0.772241 | 0.491282  | -0.6525  | 3.37E-07 | 2.53E-06 |
| CFAP73  | 2.660061 | 1.426119  | -0.89937 | 0.000273 | 0.000958 |
| LRRTM1  | 20.58715 | 12.19547  | -0.7554  | 0.018934 | 0.036989 |
| MAK     | 1.030338 | 0.669326  | -0.62234 | 3.53E-05 | 0.000158 |
| CASP1   | 2.66974  | 5.673986  | 1.087663 | 1.07E-32 | 5.43E-31 |
| TLR2    | 1.622961 | 4.194078  | 1.369725 | 2.33E-40 | 2.06E-38 |
| SALL2   | 8.154051 | 4.603272  | -0.82486 | 1.04E-08 | 1.06E-07 |
| PPP1R42 | 0.553486 | 0.232287  | -1.25264 | 2.34E-06 | 1.44E-05 |
| NOS1    | 0.275589 | 0.176967  | -0.63904 | 0.00076  | 0.002332 |
| C1S     | 23.91902 | 46.97206  | 0.973645 | 3.03E-21 | 8.29E-20 |
| POU3F3  | 1.565043 | 0.103137  | -3.92357 | 0.005941 | 0.013766 |
| DNAH11  | 0.228729 | 0.105986  | -1.10976 | 2.83E-08 | 2.65E-07 |
| SEMA6A  | 1.909666 | 0.974981  | -0.96987 | 0.001109 | 0.003223 |
| RHOA    | 16.99168 | 11.34642  | -0.58259 | 1.72E-08 | 1.67E-07 |
| FERMT3  | 3.332738 | 9.736891  | 1.546754 | 1.83E-51 | 1.73E-48 |
| SEMA4G  | 2.990546 | 1.60186   | -0.90066 | 1.73E-06 | 1.09E-05 |
| BIRC3   | 2.598427 | 4.509962  | 0.795477 | 4.57E-15 | 9.39E-14 |
| HFM1    | 0.267662 | 0.112892  | -1.24546 | 1.11E-09 | 1.33E-08 |
| SH2B3   | 3.735042 | 6.404435  | 0.777947 | 7.18E-22 | 2.04E-20 |
| CARMIL3 | 0.436499 | 0.196978  | -1.14794 | 1.75E-10 | 2.31E-09 |
| ZNF726  | 1.182231 | 0.72677   | -0.70194 | 3.36E-09 | 3.77E-08 |
| MASP1   | 0.182102 | 0.046142  | -1.98061 | 6.69E-07 | 4.72E-06 |
| NALCN   | 0.147175 | 0.235164  | 0.676136 | 1.50E-06 | 9.65E-06 |
| FBXO6   | 8.920763 | 13.65771  | 0.614476 | 1.31E-11 | 1.97E-10 |
| ADH1B   | 0.537975 | 1.877129  | 1.802916 | 2.87E-06 | 1.72E-05 |
| ABCC3   | 1.198533 | 1.80787   | 0.593021 | 5.39E-09 | 5.84E-08 |
| PDYN    | 2.0308   | 1.302268  | -0.64102 | 0.00606  | 0.013999 |
| KLK10   | 50.20504 | 76.92688  | 0.615655 | 1.13E-05 | 5.80E-05 |
| SPRR1A  | 1.045041 | 0.652862  | -0.67871 | 0.002257 | 0.005976 |
| ATP8B4  | 0.133434 | 0.296424  | 1.15153  | 2.14E-29 | 9.04E-28 |
| STAR    | 1.830956 | 0.935019  | -0.96953 | 3.68E-06 | 2.14E-05 |
| RNF157  | 1.605197 | 0.796022  | -1.01187 | 2.09E-07 | 1.65E-06 |
| NR4A3   | 0.655415 | 1.500436  | 1.194901 | 7.24E-05 | 0.000298 |
| CCL14   | 0.064276 | 0.143905  | 1.162752 | 0.003615 | 0.008977 |
| CTNND2  | 0.684069 | 0.371289  | -0.8816  | 0.00555  | 0.012985 |
| COTL1   | 10.68851 | 16.31563  | 0.610194 | 2.48E-20 | 6.54E-19 |
| ARHGDI3 | 0.66086  | 0.340022  | -0.95872 | 0.023593 | 0.044419 |
| ALDH1A3 | 0.939992 | 1.684739  | 0.841804 | 9.51E-08 | 8.06E-07 |

| Gene     | conMean  | treatMean | logFC    | pValue   | FDR      |
|----------|----------|-----------|----------|----------|----------|
| MLN      | 0.14099  | 0.081634  | -0.78836 | 0.000946 | 0.002813 |
| CASP5    | 0.054252 | 0.17262   | 1.669856 | 5.72E-28 | 2.25E-26 |
| CFD      | 4.858538 | 13.04799  | 1.425233 | 5.95E-25 | 1.98E-23 |
| GBP3     | 6.269449 | 10.39858  | 0.729976 | 3.33E-12 | 5.39E-11 |
| SCGB2B2  | 0.413368 | 0.241539  | -0.77517 | 3.78E-05 | 0.000168 |
| ODF3L1   | 0.471607 | 0.309345  | -0.60837 | 0.00023  | 0.000823 |
| ETS1     | 3.371958 | 5.461228  | 0.695639 | 1.04E-15 | 2.22E-14 |
| TNFAIP2  | 64.84923 | 100.985   | 0.638979 | 7.30E-06 | 3.96E-05 |
| CLEC4F   | 0.379328 | 0.222041  | -0.77262 | 1.14E-05 | 5.82E-05 |
| C1orf194 | 8.555842 | 3.092808  | -1.46799 | 3.47E-07 | 2.60E-06 |
| ADGRL3   | 0.583528 | 0.273767  | -1.09185 | 0.000178 | 0.000658 |
| ATP1B2   | 6.155169 | 2.64485   | -1.21861 | 8.57E-07 | 5.88E-06 |
| TEKT2    | 6.196009 | 3.063541  | -1.01614 | 2.81E-07 | 2.14E-06 |
| GPAT3    | 0.490805 | 0.747583  | 0.607084 | 1.67E-11 | 2.48E-10 |
| CLEC10A  | 0.279101 | 1.24575   | 2.158157 | 7.80E-32 | 3.81E-30 |
| TPSD1    | 0.51705  | 1.096232  | 1.084176 | 7.03E-05 | 0.00029  |
| VMO1     | 1.705843 | 3.144859  | 0.88251  | 5.43E-20 | 1.39E-18 |
| CACNG6   | 0.814587 | 0.212909  | -1.93583 | 0.011399 | 0.024089 |
| VASH2    | 0.857684 | 0.558494  | -0.61891 | 0.000505 | 0.001634 |
| FOXA2    | 5.196147 | 2.247999  | -1.2088  | 0.000988 | 0.002924 |
| PYHIN1   | 0.111827 | 0.497999  | 2.154878 | 1.20E-40 | 1.11E-38 |
| FRAS1    | 1.774843 | 1.166543  | -0.60545 | 4.79E-06 | 2.72E-05 |
| HPSE2    | 0.985309 | 0.09108   | -3.43537 | 1.89E-08 | 1.83E-07 |
| HIVEP3   | 0.568484 | 0.94033   | 0.726047 | 2.84E-14 | 5.55E-13 |
| MAGEE2   | 0.187557 | 0.094265  | -0.99254 | 0.000936 | 0.002788 |
| RPRM     | 2.477784 | 1.280387  | -0.95247 | 3.93E-09 | 4.38E-08 |
| TESPA1   | 0.090438 | 0.33551   | 1.891346 | 1.10E-46 | 2.95E-44 |
| MS4A4A   | 1.943333 | 5.473052  | 1.493812 | 2.35E-37 | 1.66E-35 |
| LINGO4   | 0.295256 | 0.194515  | -0.60209 | 0.022855 | 0.043243 |
| SOWAHD   | 0.541815 | 0.889131  | 0.714595 | 1.24E-17 | 2.92E-16 |
| SLC7A7   | 2.958846 | 4.837341  | 0.70918  | 9.04E-35 | 5.52E-33 |
| CCDC80   | 5.197448 | 9.851885  | 0.922596 | 1.48E-08 | 1.46E-07 |
| CTSS     | 9.301059 | 24.59614  | 1.402965 | 4.79E-41 | 4.59E-39 |
| CCL3L1   | 1.288259 | 2.50386   | 0.958732 | 3.16E-14 | 6.17E-13 |
| SEMA5B   | 6.119882 | 3.13211   | -0.96637 | 8.07E-06 | 4.32E-05 |
| TIMP4    | 0.812235 | 1.66503   | 1.035579 | 1.01E-07 | 8.54E-07 |
| DLK1     | 20.11822 | 1.39409   | -3.85111 | 9.43E-08 | 8.00E-07 |
| ARHGAP45 | 2.492021 | 4.851572  | 0.961136 | 6.86E-27 | 2.52E-25 |
| GBP6     | 0.084061 | 0.159717  | 0.926001 | 4.78E-13 | 8.37E-12 |
| FLVCR2   | 0.637857 | 1.011625  | 0.665369 | 1.06E-16 | 2.39E-15 |
| PCED1B   | 2.429434 | 3.663679  | 0.592673 | 1.96E-20 | 5.19E-19 |
| PLXNA4   | 1.703674 | 0.660261  | -1.36754 | 0.000343 | 0.001166 |
| SFRP4    | 8.991441 | 25.61228  | 1.510211 | 3.61E-13 | 6.39E-12 |
| TTC23L   | 0.308243 | 0.16827   | -0.87329 | 3.92E-11 | 5.58E-10 |
| CA14     | 1.066964 | 0.504052  | -1.08187 | 9.06E-10 | 1.10E-08 |
| FTH1     | 860.0183 | 1316.721  | 0.61451  | 1.20E-12 | 2.03E-11 |

| Gene     | conMean  | treatMean | logFC    | pValue   | FDR      |
|----------|----------|-----------|----------|----------|----------|
| P2RY10   | 0.141672 | 0.76861   | 2.439694 | 3.27E-43 | 4.25E-41 |
| APOBEC3G | 2.730302 | 5.055484  | 0.888789 | 2.85E-21 | 7.80E-20 |
| DACT2    | 4.088464 | 1.825726  | -1.16309 | 5.24E-09 | 5.69E-08 |
| CBR3     | 2.349336 | 3.853512  | 0.713921 | 2.22E-13 | 4.05E-12 |
| GNAZ     | 2.927119 | 1.93783   | -0.59504 | 2.15E-06 | 1.33E-05 |
| FAM155A  | 0.170591 | 0.258136  | 0.597592 | 4.16E-07 | 3.06E-06 |
| SLC38A5  | 1.890263 | 3.438619  | 0.863242 | 8.10E-12 | 1.25E-10 |
| BAMBI    | 4.294582 | 2.005821  | -1.09833 | 1.14E-05 | 5.84E-05 |
| LIPA     | 11.18885 | 16.76707  | 0.583569 | 2.53E-15 | 5.29E-14 |
| OPRK1    | 0.247137 | 0.162181  | -0.60771 | 0.00072  | 0.002223 |
| TRIM71   | 0.651003 | 0.283718  | -1.19821 | 1.85E-06 | 1.17E-05 |
| ERAP2    | 3.510691 | 5.420675  | 0.626717 | 3.29E-05 | 0.000149 |
| IL18     | 5.068261 | 7.606752  | 0.58579  | 2.61E-13 | 4.70E-12 |
| P2RY13   | 0.567596 | 1.840355  | 1.697048 | 7.36E-33 | 3.82E-31 |
| PACRG    | 1.373267 | 0.668098  | -1.03948 | 4.19E-09 | 4.65E-08 |
| CFAP65   | 0.368952 | 0.154179  | -1.25883 | 8.15E-10 | 1.00E-08 |
| CFAP47   | 0.355403 | 0.174505  | -1.02619 | 1.40E-05 | 7.02E-05 |
| MYO3B    | 1.170878 | 0.779705  | -0.58659 | 0.002115 | 0.005642 |
| ABTB2    | 3.083688 | 1.830566  | -0.75237 | 4.48E-05 | 0.000195 |
| FIGN     | 1.957599 | 1.200337  | -0.70565 | 4.28E-05 | 0.000188 |
| PRTG     | 0.2349   | 0.107987  | -1.12119 | 1.69E-05 | 8.31E-05 |
| FABP4    | 1.929816 | 6.695299  | 1.794685 | 0.001201 | 0.003455 |
| ADRB2    | 0.165577 | 0.306666  | 0.889165 | 2.12E-15 | 4.44E-14 |
| ANO1     | 8.905888 | 4.334461  | -1.03891 | 0.008877 | 0.019448 |
| PDE4B    | 0.701836 | 1.590049  | 1.179866 | 1.07E-29 | 4.64E-28 |
| BMP7     | 25.9338  | 13.68986  | -0.92173 | 8.73E-07 | 5.98E-06 |
| C9orf24  | 8.915642 | 3.887834  | -1.19737 | 0.000186 | 0.000684 |
| BCL11B   | 0.200494 | 0.306444  | 0.612063 | 1.65E-12 | 2.75E-11 |
| KIF5A    | 1.533053 | 0.949013  | -0.69191 | 4.32E-05 | 0.000189 |
| RBP2     | 0.705305 | 0.447353  | -0.65683 | 0.000414 | 0.001377 |
| TMEM176A | 11.56796 | 19.85013  | 0.779014 | 2.57E-15 | 5.36E-14 |
| VSIR     | 7.492258 | 12.66372  | 0.757229 | 4.13E-18 | 9.91E-17 |
| RAPSN    | 0.760256 | 0.404998  | -0.90857 | 0.000121 | 0.000467 |
| WNT8B    | 0.299199 | 0.144237  | -1.05267 | 0.01219  | 0.025519 |
| FBXO17   | 6.788365 | 3.810035  | -0.83326 | 6.24E-07 | 4.42E-06 |
| TMEM132B | 0.70316  | 0.202599  | -1.79523 | 4.02E-10 | 5.14E-09 |
| TMSB15A  | 7.646376 | 2.164901  | -1.82048 | 7.18E-05 | 0.000296 |
| UPP1     | 2.24598  | 3.729051  | 0.731464 | 2.31E-13 | 4.20E-12 |
| MATN4    | 0.833102 | 0.213921  | -1.96142 | 8.67E-08 | 7.40E-07 |
| ALDH3A1  | 1.738591 | 1.063217  | -0.70948 | 2.27E-07 | 1.78E-06 |
| RADIL    | 0.699381 | 0.419621  | -0.73699 | 0.002719 | 0.007039 |
| RNASE1   | 176.0253 | 274.1773  | 0.639327 | 9.97E-12 | 1.52E-10 |
| SLA2     | 0.288979 | 1.040511  | 1.848257 | 5.74E-46 | 1.25E-43 |
| TP73     | 1.093561 | 0.691317  | -0.66161 | 0.004981 | 0.011841 |
| EPPIN    | 0.138838 | 0.08226   | -0.75514 | 0.006021 | 0.013924 |



| Gene     | conMean  | treatMean | logFC    | pValue   | FDR      |
|----------|----------|-----------|----------|----------|----------|
| SNX20    | 0.316831 | 1.270944  | 2.004114 | 1.38E-51 | 1.39E-48 |
| IL15     | 0.615019 | 1.447174  | 1.234535 | 1.32E-24 | 4.28E-23 |
| TLL2     | 0.158576 | 0.072107  | -1.13697 | 0.00293  | 0.00751  |
| GYPC     | 5.866552 | 8.957828  | 0.610636 | 4.89E-17 | 1.13E-15 |
| TMEM52B  | 0.189196 | 0.572622  | 1.597703 | 3.74E-39 | 2.99E-37 |
| CACNA2D2 | 3.684197 | 1.337243  | -1.46209 | 2.05E-12 | 3.37E-11 |
| HGFAC    | 1.081093 | 0.609387  | -0.82706 | 1.71E-06 | 1.08E-05 |
| PON1     | 1.298023 | 0.679073  | -0.93468 | 0.000465 | 0.00152  |
| BST1     | 2.574821 | 4.567402  | 0.826902 | 6.15E-15 | 1.25E-13 |
| MCUB     | 5.45088  | 8.469165  | 0.635731 | 2.50E-12 | 4.07E-11 |
| ALOX5    | 4.348043 | 10.39827  | 1.257906 | 1.83E-28 | 7.26E-27 |
| MYOM3    | 0.368547 | 0.206332  | -0.83689 | 0.007638 | 0.017066 |
| ABI3     | 2.143772 | 6.656652  | 1.634645 | 4.83E-54 | 1.37E-50 |
| DNAH10   | 0.213263 | 0.124181  | -0.78018 | 8.83E-05 | 0.000355 |
| TMEM238L | 0.238169 | 0.093674  | -1.34627 | 0.009869 | 0.021251 |
| HCST     | 7.318767 | 17.02954  | 1.218367 | 1.82E-35 | 1.15E-33 |
| IL7R     | 0.6218   | 2.149656  | 1.789585 | 1.62E-33 | 8.97E-32 |
| NTN4     | 8.034261 | 12.18435  | 0.600792 | 1.74E-07 | 1.40E-06 |
| FGF1     | 0.467734 | 0.767233  | 0.713977 | 9.47E-07 | 6.43E-06 |
| TMEM71   | 0.387369 | 0.645444  | 0.736583 | 2.33E-19 | 5.83E-18 |
| ATP1A2   | 1.176281 | 0.265546  | -2.1472  | 6.62E-08 | 5.79E-07 |
| SLC30A3  | 0.226624 | 0.094102  | -1.268   | 0.020103 | 0.038835 |
| CD86     | 1.466902 | 4.884888  | 1.735553 | 2.07E-52 | 2.67E-49 |
| LRRC10B  | 3.329037 | 1.554078  | -1.09905 | 5.38E-06 | 3.01E-05 |
| CXCL6    | 0.854677 | 1.64713   | 0.946504 | 1.46E-08 | 1.44E-07 |
| MATK     | 0.561923 | 1.027136  | 0.870182 | 2.41E-26 | 8.54E-25 |
| PLD4     | 0.73819  | 1.822279  | 1.303679 | 5.24E-18 | 1.25E-16 |
| PDE3A    | 4.688624 | 3.087985  | -0.6025  | 0.001622 | 0.004478 |
| SPINK5   | 1.13415  | 0.625293  | -0.85901 | 4.52E-09 | 5.00E-08 |
| MSR1     | 2.227749 | 6.077337  | 1.447853 | 6.49E-38 | 4.76E-36 |
| XDH      | 0.921951 | 1.532041  | 0.732694 | 0.001052 | 0.003086 |
| TCIRG1   | 15.97711 | 24.36623  | 0.608877 | 1.51E-15 | 3.18E-14 |
| TNFRSF19 | 7.805849 | 4.013377  | -0.95974 | 8.94E-07 | 6.10E-06 |
| VWA5B2   | 0.422767 | 0.175166  | -1.27114 | 5.41E-08 | 4.78E-07 |
| TMEM86A  | 1.541444 | 2.350318  | 0.608574 | 1.44E-16 | 3.22E-15 |
| CALHM6   | 3.723063 | 9.794694  | 1.39551  | 3.02E-31 | 1.43E-29 |
| CHGA     | 4.317555 | 0.837448  | -2.36614 | 0.001968 | 0.005297 |
| KCNJ10   | 0.204174 | 0.318289  | 0.640539 | 9.04E-05 | 0.000362 |
| KCNMB2   | 1.058972 | 0.589367  | -0.84543 | 5.69E-05 | 0.000241 |
| PIP5K1B  | 0.777228 | 0.374518  | -1.0533  | 0.004058 | 0.009914 |
| CADPS    | 0.322066 | 0.191326  | -0.75132 | 0.000789 | 0.002407 |
| GBP2     | 4.879737 | 11.62307  | 1.252115 | 2.35E-32 | 1.18E-30 |
| KCNG1    | 3.468308 | 1.715933  | -1.01524 | 4.87E-09 | 5.34E-08 |
| MST1     | 3.49633  | 2.119948  | -0.72181 | 1.30E-07 | 1.07E-06 |
| PLEK2    | 2.62999  | 4.148054  | 0.657377 | 1.78E-14 | 3.54E-13 |
| GIMAP5   | 0.084495 | 0.273113  | 1.692555 | 3.44E-34 | 1.99E-32 |

| Gene     | conMean  | treatMean | logFC    | pValue   | FDR      |
|----------|----------|-----------|----------|----------|----------|
| CNNM1    | 0.289803 | 0.097782  | -1.56743 | 0.000362 | 0.001225 |
| CNIH2    | 3.420844 | 2.071902  | -0.7234  | 3.13E-05 | 0.000143 |
| BSN      | 0.675921 | 0.313228  | -1.10964 | 4.23E-11 | 6.01E-10 |
| FAM110B  | 3.646865 | 2.252977  | -0.69482 | 2.05E-08 | 1.98E-07 |
| NAALAD2  | 0.348482 | 0.191655  | -0.86257 | 0.004094 | 0.009994 |
| PAPPA    | 0.106245 | 0.19408   | 0.869253 | 3.45E-06 | 2.03E-05 |
| CXCL8    | 6.871517 | 12.19152  | 0.827177 | 4.66E-07 | 3.38E-06 |
| RAB9B    | 0.444959 | 0.2817    | -0.65951 | 0.002479 | 0.006489 |
| HEPH     | 1.134495 | 1.786723  | 0.655266 | 1.22E-07 | 1.01E-06 |
| DLX4     | 0.944965 | 0.572774  | -0.72229 | 0.000455 | 0.001493 |
| ABCG5    | 0.178708 | 0.097668  | -0.87165 | 4.98E-09 | 5.45E-08 |
| GEM      | 1.681142 | 2.538959  | 0.594795 | 1.91E-06 | 1.20E-05 |
| MYO1F    | 1.086015 | 2.815537  | 1.374366 | 5.89E-38 | 4.37E-36 |
| DRC1     | 1.612439 | 0.697823  | -1.20831 | 9.88E-05 | 0.000391 |
| S100A12  | 0.433642 | 0.932946  | 1.105287 | 1.44E-11 | 2.15E-10 |
| SLC2A3   | 3.885928 | 6.836901  | 0.815083 | 4.97E-07 | 3.59E-06 |
| WARS1    | 21.83302 | 32.84614  | 0.589213 | 8.67E-11 | 1.19E-09 |
| SLC6A20  | 0.91609  | 0.394668  | -1.21485 | 0.00085  | 0.002568 |
| NCKAP1L  | 0.827216 | 2.685165  | 1.698675 | 4.94E-45 | 8.14E-43 |
| SPATA17  | 1.14389  | 0.628265  | -0.8645  | 2.95E-09 | 3.33E-08 |
| C1orf162 | 4.236546 | 10.28583  | 1.279697 | 1.32E-42 | 1.56E-40 |
| MAF      | 3.833037 | 6.041073  | 0.656317 | 1.45E-15 | 3.06E-14 |
| SLC4A8   | 0.611088 | 0.38839   | -0.65387 | 9.41E-08 | 7.99E-07 |
| C9orf92  | 0.628106 | 0.356333  | -0.81778 | 0.0013   | 0.003699 |
| MCEMP1   | 0.168762 | 0.374682  | 1.150672 | 3.16E-09 | 3.57E-08 |
| HLA-F    | 5.357011 | 12.07892  | 1.172991 | 3.52E-26 | 1.24E-24 |
| CD44     | 5.491076 | 10.13289  | 0.883886 | 1.09E-21 | 3.05E-20 |
| IL18RAP  | 0.065932 | 0.237681  | 1.84997  | 9.64E-38 | 6.97E-36 |
| NTM      | 0.680963 | 1.373622  | 1.012337 | 1.45E-10 | 1.93E-09 |
| TECTA    | 0.368785 | 0.182958  | -1.01127 | 0.015534 | 0.0313   |
| NKX6-2   | 0.300783 | 0.113257  | -1.40912 | 0.003541 | 0.008824 |
| HPCAL4   | 0.267747 | 0.117139  | -1.19265 | 6.96E-05 | 0.000288 |
| TPSB2    | 1.049106 | 1.933218  | 0.881843 | 6.76E-11 | 9.42E-10 |
| ALPP     | 9.098287 | 3.344571  | -1.44377 | 0.001477 | 0.004128 |
| PURG     | 0.289111 | 0.133844  | -1.11107 | 1.63E-06 | 1.04E-05 |
| ACTL6B   | 0.303051 | 0.014061  | -4.42975 | 0.000845 | 0.002553 |
| SERPINA6 | 0.582053 | 0.112821  | -2.36712 | 0.021636 | 0.041327 |
| DUSP26   | 0.345628 | 0.169055  | -1.03173 | 0.014526 | 0.029637 |
| PCDHA7   | 0.125026 | 0.075635  | -0.7251  | 0.002735 | 0.007077 |
| MARCHF1  | 0.650391 | 1.432676  | 1.139333 | 1.02E-36 | 7.01E-35 |
| CD7      | 1.113166 | 4.116471  | 1.88674  | 3.88E-40 | 3.42E-38 |
| FGF7     | 0.400787 | 0.910811  | 1.184317 | 4.46E-14 | 8.64E-13 |
| ADAM12   | 1.851462 | 3.92841   | 1.085281 | 9.56E-09 | 9.79E-08 |
| ELOVL2   | 0.778817 | 0.384672  | -1.01766 | 0.000177 | 0.000656 |
| SPOCK3   | 0.987093 | 0.417568  | -1.24118 | 0.007604 | 0.017003 |

| Gene     | conMean  | treatMean | logFC    | pValue   | FDR      |
|----------|----------|-----------|----------|----------|----------|
| CCL21    | 3.362454 | 11.91935  | 1.825719 | 1.42E-06 | 9.20E-06 |
| BDKRB1   | 0.135026 | 0.20877   | 0.62867  | 1.21E-05 | 6.14E-05 |
| CLDN9    | 13.75427 | 7.188984  | -0.93602 | 3.95E-07 | 2.92E-06 |
| TYMP     | 11.27437 | 33.35021  | 1.564649 | 4.49E-43 | 5.73E-41 |
| C15orf48 | 6.230182 | 13.08332  | 1.070383 | 3.30E-19 | 8.23E-18 |
| MNDA     | 1.59655  | 5.582373  | 1.805921 | 3.65E-50 | 2.07E-47 |
| CKB      | 83.04361 | 47.20025  | -0.81507 | 9.61E-08 | 8.13E-07 |
| ITGAD    | 0.088332 | 0.179972  | 1.026767 | 2.15E-08 | 2.07E-07 |
| CCDC74B  | 1.836095 | 0.917935  | -1.00018 | 1.12E-08 | 1.13E-07 |
| EML6     | 0.185602 | 0.111166  | -0.7395  | 4.49E-08 | 4.03E-07 |
| INHBE    | 0.393993 | 0.222042  | -0.82734 | 4.60E-05 | 0.0002   |
| UCP1     | 0.178205 | 0.110291  | -0.69223 | 0.000259 | 0.000914 |
| EPYC     | 3.795484 | 11.51431  | 1.601073 | 1.79E-10 | 2.37E-09 |
| MT2A     | 107.7304 | 182.8591  | 0.763307 | 7.09E-13 | 1.22E-11 |
| CD33     | 0.313414 | 0.874069  | 1.479677 | 1.95E-45 | 3.69E-43 |
| TGM3     | 0.24433  | 0.138499  | -0.81895 | 0.000468 | 0.00153  |
| ZMYND10  | 4.688866 | 2.1553    | -1.12135 | 4.20E-05 | 0.000185 |
| HHIPL2   | 0.508386 | 0.147148  | -1.78865 | 0.002475 | 0.006481 |
| ADAM19   | 1.156916 | 2.274559  | 0.975303 | 3.54E-18 | 8.51E-17 |
| MARCO    | 1.318128 | 4.311323  | 1.709641 | 3.58E-16 | 7.88E-15 |
| CCR8     | 0.281398 | 0.424371  | 0.592716 | 1.32E-19 | 3.34E-18 |
| HPGDS    | 0.544475 | 1.174629  | 1.109267 | 3.22E-19 | 8.04E-18 |
| ITK      | 0.079683 | 0.383782  | 2.267937 | 3.02E-46 | 7.38E-44 |
| DOK2     | 1.291666 | 3.662138  | 1.503453 | 3.79E-44 | 5.60E-42 |
| KLHL32   | 0.859093 | 0.510481  | -0.75096 | 4.44E-06 | 2.54E-05 |
| MMP19    | 1.819048 | 3.480526  | 0.936122 | 2.27E-17 | 5.30E-16 |
| RENBP    | 3.066529 | 5.319491  | 0.794682 | 4.79E-19 | 1.19E-17 |
| PDE11A   | 0.604071 | 0.401546  | -0.58915 | 0.008828 | 0.019363 |
| PDZK1IP1 | 37.09506 | 74.38445  | 1.003774 | 5.77E-14 | 1.11E-12 |
| CIITA    | 2.271944 | 5.151896  | 1.181176 | 5.53E-19 | 1.37E-17 |
| ALPL     | 61.17052 | 32.84247  | -0.89727 | 3.03E-06 | 1.81E-05 |
| VWA3B    | 0.443247 | 0.21504   | -1.04351 | 0.009451 | 0.020501 |
| C22orf23 | 0.565337 | 0.362229  | -0.64221 | 1.40E-07 | 1.15E-06 |
| PCDHA5   | 0.126201 | 0.081061  | -0.63864 | 7.41E-05 | 0.000304 |
| SEC14L5  | 0.253618 | 0.086105  | -1.55849 | 2.85E-08 | 2.67E-07 |
| DMTN     | 12.96789 | 8.028902  | -0.69167 | 1.33E-07 | 1.09E-06 |
| ABHD12B  | 0.349742 | 0.180571  | -0.95372 | 0.016645 | 0.033189 |
| PF4      | 0.160414 | 1.291513  | 3.009194 | 0.002024 | 0.005427 |
| FLRT3    | 2.941145 | 1.515285  | -0.95679 | 4.53E-05 | 0.000197 |
| DNAI1    | 1.2416   | 0.580708  | -1.09632 | 1.70E-07 | 1.37E-06 |
| CYTIP    | 0.717401 | 2.227102  | 1.634317 | 1.15E-44 | 1.81E-42 |
| NREP     | 15.72885 | 10.32041  | -0.60791 | 0.000128 | 0.000492 |
| ZMAT4    | 0.157887 | 0.073498  | -1.10311 | 0.00517  | 0.01222  |
| ADAMDEC1 | 0.833061 | 4.364588  | 2.389351 | 3.08E-31 | 1.46E-29 |
| TBX21    | 0.085254 | 0.375272  | 2.138102 | 7.70E-43 | 9.40E-41 |
| IL2RA    | 0.399791 | 1.230813  | 1.622292 | 9.58E-35 | 5.83E-33 |

| Gene     | conMean  | treatMean | logFC    | pValue   | FDR      |
|----------|----------|-----------|----------|----------|----------|
| MUC3A    | 0.169741 | 0.306983  | 0.854819 | 0.014792 | 0.030053 |
| CH25H    | 0.654857 | 1.260621  | 0.944882 | 5.15E-15 | 1.05E-13 |
| ZNF682   | 1.560104 | 1.034311  | -0.59297 | 1.11E-10 | 1.50E-09 |
| HSPB6    | 27.51225 | 15.32368  | -0.84431 | 0.003322 | 0.008356 |
| LYL1     | 1.103684 | 2.007907  | 0.863365 | 3.60E-29 | 1.50E-27 |
| KCNH8    | 0.349263 | 0.199704  | -0.80645 | 1.02E-05 | 5.30E-05 |
| KCNH3    | 3.765136 | 1.878851  | -1.00285 | 8.35E-10 | 1.02E-08 |
| IQUB     | 0.245596 | 0.09701   | -1.34009 | 1.71E-06 | 1.08E-05 |
| ANKRD45  | 2.344355 | 1.17084   | -1.00165 | 4.17E-10 | 5.31E-09 |
| CST7     | 3.698734 | 10.33415  | 1.482317 | 9.32E-36 | 6.03E-34 |
| ZNF660   | 1.10724  | 0.668348  | -0.7283  | 4.24E-14 | 8.23E-13 |
| CSAG2    | 0.227469 | 0.450746  | 0.986646 | 1.30E-05 | 6.56E-05 |
| TET1     | 0.932852 | 0.462506  | -1.01217 | 9.90E-12 | 1.52E-10 |
| PSMB10   | 10.2438  | 19.6717   | 0.94137  | 3.73E-25 | 1.26E-23 |
| HOPX     | 1.875159 | 3.750061  | 0.999901 | 1.69E-13 | 3.13E-12 |
| PLAUR    | 6.518998 | 11.92755  | 0.871576 | 7.04E-23 | 2.10E-21 |
| MAP1B    | 5.38437  | 3.50161   | -0.62076 | 0.001324 | 0.003754 |
| TMEM200A | 0.645532 | 1.111053  | 0.783367 | 1.93E-12 | 3.18E-11 |
| STX11    | 0.769027 | 2.289317  | 1.573812 | 3.74E-46 | 8.99E-44 |
| SLCO1A2  | 0.40609  | 0.167638  | -1.27645 | 2.76E-07 | 2.11E-06 |
| TNFSF10  | 33.31352 | 59.70242  | 0.841682 | 3.82E-15 | 7.88E-14 |
| IGFN1    | 0.208465 | 0.0326    | -2.67688 | 3.65E-06 | 2.13E-05 |
| KCNN1    | 1.266683 | 0.591221  | -1.09929 | 0.006355 | 0.014561 |
| NINL     | 3.507551 | 2.306158  | -0.60497 | 2.30E-08 | 2.19E-07 |
| DNAH7    | 0.260785 | 0.135816  | -0.94121 | 1.63E-09 | 1.92E-08 |
| SDS      | 2.140998 | 4.984671  | 1.219215 | 1.77E-28 | 7.06E-27 |
| ZC3H12B  | 0.351142 | 0.224946  | -0.64248 | 0.000174 | 0.000646 |
| IL12A    | 1.106054 | 1.780969  | 0.68724  | 2.52E-06 | 1.53E-05 |
| FAP      | 1.004136 | 2.450598  | 1.287179 | 4.12E-13 | 7.24E-12 |
| TCF24    | 0.215998 | 0.133495  | -0.69423 | 0.000523 | 0.001683 |
| ST8SIA2  | 1.20615  | 0.553374  | -1.12408 | 0.000486 | 0.001582 |
| CTLA4    | 0.160894 | 0.774847  | 2.267799 | 1.29E-40 | 1.19E-38 |
| C1QTNF9B | 0.313457 | 0.092179  | -1.76576 | 1.11E-06 | 7.38E-06 |
| CCDC146  | 18.48308 | 8.530288  | -1.11554 | 1.22E-07 | 1.01E-06 |
| IQSEC3   | 4.427613 | 2.825877  | -0.64783 | 0.012953 | 0.026886 |
| COL5A1   | 20.53262 | 39.57965  | 0.946841 | 4.12E-06 | 2.37E-05 |
| SEZ6     | 1.398787 | 0.303358  | -2.20508 | 0.004118 | 0.010034 |
| TTLL9    | 0.685304 | 0.381027  | -0.84685 | 8.61E-09 | 8.99E-08 |
| CFAP77   | 1.753429 | 0.592374  | -1.5656  | 7.54E-05 | 0.000309 |
| ASPN     | 2.355894 | 3.698144  | 0.650527 | 3.37E-07 | 2.53E-06 |
| GPR171   | 0.201018 | 0.884551  | 2.137622 | 5.15E-38 | 3.84E-36 |
| VCX      | 0.335948 | 0.141482  | -1.24762 | 4.60E-05 | 0.0002   |
| PNMA3    | 4.153835 | 1.987079  | -1.06379 | 3.28E-13 | 5.82E-12 |
| CLDN2    | 0.28471  | 0.062466  | -2.18836 | 0.00061  | 0.001927 |
| CCDC65   | 2.955398 | 1.692428  | -0.80426 | 1.01E-08 | 1.03E-07 |

| Gene    | conMean  | treatMean | logFC    | pValue   | FDR      |
|---------|----------|-----------|----------|----------|----------|
| XCR1    | 0.042185 | 0.165414  | 1.971272 | 3.48E-27 | 1.31E-25 |
| SLC34A3 | 0.517432 | 0.253916  | -1.02702 | 2.50E-06 | 1.52E-05 |
| TRARG1  | 0.081423 | 0.380965  | 2.226155 | 0.00064  | 0.002004 |
| CXCL1   | 8.828949 | 16.67234  | 0.917143 | 2.61E-09 | 2.99E-08 |
| LRTM2   | 0.462493 | 0.0479    | -3.27132 | 1.16E-08 | 1.17E-07 |
| NUPR1   | 12.71268 | 20.06349  | 0.658304 | 1.15E-09 | 1.37E-08 |
| ORM1    | 0.714982 | 1.375331  | 0.9438   | 0.000604 | 0.001912 |
| CNTFR   | 9.123331 | 5.695954  | -0.67962 | 1.27E-07 | 1.05E-06 |
| AGTR1   | 0.187688 | 0.318957  | 0.765023 | 4.25E-06 | 2.44E-05 |
| RIBC1   | 2.298085 | 1.44902   | -0.66535 | 7.59E-05 | 0.00031  |
| MMP9    | 8.439042 | 33.03664  | 1.968916 | 2.52E-23 | 7.66E-22 |
| ITGB7   | 0.714923 | 1.329487  | 0.89501  | 2.16E-16 | 4.80E-15 |
| CTSK    | 20.11946 | 43.2987   | 1.105732 | 2.17E-14 | 4.29E-13 |
| PCDHB3  | 1.57385  | 0.79072   | -0.99306 | 0.001038 | 0.003051 |
| TMEM38A | 6.830471 | 4.181644  | -0.70791 | 8.48E-07 | 5.83E-06 |
| THEMIS  | 0.065859 | 0.327031  | 2.311976 | 1.39E-40 | 1.27E-38 |
| GPR65   | 0.423544 | 1.380975  | 1.705105 | 4.51E-46 | 1.06E-43 |
| IGSF6   | 1.152355 | 3.226137  | 1.485222 | 4.75E-45 | 8.01E-43 |
| WAS     | 2.707252 | 7.373475  | 1.445515 | 6.22E-48 | 2.15E-45 |
| GDF6    | 0.215109 | 0.333296  | 0.631736 | 0.000989 | 0.002928 |
| CPA2    | 13.2278  | 0.192134  | -6.10532 | 1.18E-06 | 7.83E-06 |
| ITGBL1  | 0.261506 | 0.611935  | 1.226536 | 2.08E-11 | 3.04E-10 |
| LHX1    | 11.70361 | 4.439415  | -1.39851 | 1.69E-06 | 1.07E-05 |
| WSCD1   | 0.262433 | 0.136541  | -0.94261 | 0.025619 | 0.047676 |
| MCHR1   | 0.118694 | 0.536068  | 2.175176 | 1.81E-05 | 8.79E-05 |
| PRAM1   | 0.520191 | 0.917286  | 0.818332 | 1.11E-16 | 2.50E-15 |
| LILRB3  | 0.314129 | 0.731656  | 1.21981  | 2.36E-33 | 1.28E-31 |
| ST8SIA3 | 0.222147 | 0.014376  | -3.94975 | 1.31E-08 | 1.31E-07 |
| AOC3    | 1.435293 | 2.267888  | 0.660004 | 2.25E-08 | 2.16E-07 |
| COPZ2   | 3.59361  | 5.842619  | 0.701181 | 3.64E-10 | 4.67E-09 |
| GFRA2   | 1.094092 | 0.381247  | -1.52094 | 0.003071 | 0.00781  |
| CORO1A  | 5.520445 | 12.88547  | 1.222888 | 2.00E-34 | 1.19E-32 |
| UBE2U   | 0.160536 | 0.077856  | -1.04401 | 0.006617 | 0.015084 |
| FOXP3   | 0.820113 | 2.181629  | 1.411512 | 3.40E-34 | 1.97E-32 |
| CD74    | 665.6254 | 1512.714  | 1.184357 | 3.71E-28 | 1.46E-26 |
| GALNT9  | 0.774882 | 0.242797  | -1.67423 | 0.013331 | 0.027563 |
| ODAM    | 0.24254  | 0.071598  | -1.76022 | 0.005545 | 0.012975 |
| SEPLG   | 3.578884 | 10.54321  | 1.558732 | 4.39E-45 | 7.49E-43 |
| SHISA8  | 0.532687 | 0.320546  | -0.73275 | 0.00782  | 0.017422 |
| ZNF676  | 1.030055 | 0.550599  | -0.90365 | 0.000384 | 0.001288 |
| CCN5    | 0.552918 | 0.914304  | 0.725609 | 0.020054 | 0.038754 |
| SLC16A3 | 6.031036 | 9.471679  | 0.651214 | 3.42E-13 | 6.05E-12 |
| LRRC43  | 1.334364 | 0.782729  | -0.76957 | 2.17E-06 | 1.34E-05 |
| CCDC74A | 7.14278  | 4.645175  | -0.62075 | 2.85E-05 | 0.000131 |
| CECR2   | 0.596695 | 0.263257  | -1.18052 | 7.56E-06 | 4.09E-05 |
| DTNA    | 1.319475 | 0.649353  | -1.02289 | 3.81E-05 | 0.000169 |

| Gene     | conMean  | treatMean | logFC    | pValue   | FDR      |
|----------|----------|-----------|----------|----------|----------|
| C1R      | 28.10157 | 44.87367  | 0.675219 | 7.50E-17 | 1.70E-15 |
| SLAMF6   | 0.316052 | 1.407985  | 2.155399 | 9.36E-42 | 9.90E-40 |
| CD300LF  | 0.364042 | 1.335326  | 1.875014 | 8.18E-49 | 3.41E-46 |
| COL8A1   | 3.858759 | 8.802493  | 1.189775 | 2.10E-10 | 2.75E-09 |
| CFAP43   | 1.111382 | 0.597661  | -0.89496 | 1.36E-08 | 1.35E-07 |
| RGS4     | 1.37336  | 2.73112   | 0.991783 | 2.28E-08 | 2.18E-07 |
| UPK1A    | 1.838023 | 0.849702  | -1.11313 | 0.014563 | 0.029701 |
| C7orf57  | 1.869375 | 0.756692  | -1.30478 | 0.001807 | 0.00492  |
| GPC5     | 0.472875 | 0.267806  | -0.82027 | 0.022633 | 0.042902 |
| BRINP2   | 0.615238 | 0.215865  | -1.51101 | 3.14E-05 | 0.000143 |
| SPAG8    | 1.980217 | 1.200384  | -0.72216 | 4.48E-07 | 3.27E-06 |
| CD3E     | 1.105592 | 5.369645  | 2.280008 | 1.12E-47 | 3.60E-45 |
| UNC119B  | 9.942262 | 6.362047  | -0.64408 | 6.14E-13 | 1.06E-11 |
| KCNA3    | 0.114536 | 0.336914  | 1.556582 | 3.90E-24 | 1.25E-22 |
| CRHR2    | 0.171938 | 0.09629   | -0.83643 | 0.007521 | 0.016836 |
| AGR3     | 7.046352 | 3.11566   | -1.17734 | 2.89E-07 | 2.21E-06 |
| C3AR1    | 3.348786 | 10.82642  | 1.692846 | 1.98E-45 | 3.69E-43 |
| TYROBP   | 54.42428 | 158.465   | 1.541842 | 7.43E-49 | 3.28E-46 |
| TSNAXIP1 | 0.685248 | 0.398333  | -0.78265 | 5.69E-10 | 7.12E-09 |
| IKZF1    | 0.500051 | 1.508503  | 1.59297  | 3.98E-40 | 3.48E-38 |
| ENO4     | 0.384157 | 0.226285  | -0.76356 | 1.07E-08 | 1.09E-07 |
| SOX18    | 19.29708 | 29.09771  | 0.592523 | 1.54E-06 | 9.88E-06 |
| PPP1R1A  | 1.897867 | 1.177988  | -0.68805 | 0.010644 | 0.022688 |
| SRCIN1   | 0.856151 | 0.560705  | -0.61062 | 1.92E-05 | 9.25E-05 |
| SULT1E1  | 0.445674 | 0.272858  | -0.70784 | 0.000193 | 0.000707 |
| SOX21    | 0.753563 | 0.180332  | -2.06307 | 0.006078 | 0.01403  |
| PAEP     | 8.061427 | 23.61824  | 1.550794 | 8.46E-05 | 0.000342 |
| PLEKHO2  | 6.761839 | 11.78797  | 0.801828 | 1.70E-28 | 6.79E-27 |
| SELENOM  | 17.90377 | 27.84947  | 0.637386 | 7.42E-08 | 6.43E-07 |
| EFCAB1   | 1.487329 | 0.454172  | -1.71141 | 0.000743 | 0.002284 |
| PRB3     | 0.430475 | 0.173084  | -1.31446 | 0.000211 | 0.000764 |
| MS4A1    | 0.045023 | 0.295413  | 2.714015 | 8.58E-25 | 2.82E-23 |
| HLA-DQA1 | 8.010353 | 28.09167  | 1.810205 | 4.62E-40 | 3.97E-38 |
| FAM181B  | 1.038462 | 0.550626  | -0.9153  | 0.010389 | 0.02222  |
| CYP24A1  | 0.548331 | 0.83565   | 0.607851 | 5.28E-08 | 4.68E-07 |
| RNASE6   | 6.195626 | 18.25244  | 1.558768 | 1.06E-43 | 1.51E-41 |
| FKBP5    | 3.923042 | 5.875225  | 0.582671 | 1.86E-07 | 1.49E-06 |
| SPTBN4   | 0.529007 | 0.275139  | -0.94312 | 0.000396 | 0.001326 |
| TEX45    | 0.993368 | 0.599215  | -0.72926 | 5.78E-06 | 3.21E-05 |
| COLEC11  | 5.499892 | 2.348557  | -1.22763 | 3.69E-08 | 3.37E-07 |
| KIAA0895 | 1.890273 | 1.212538  | -0.64056 | 3.58E-12 | 5.79E-11 |
| IGDCC3   | 1.433001 | 0.128956  | -3.47409 | 8.01E-09 | 8.41E-08 |
| C4orf54  | 0.44789  | 0.123185  | -1.86232 | 4.61E-09 | 5.08E-08 |
| CSTL1    | 0.176678 | 0.113526  | -0.6381  | 0.006138 | 0.014142 |
| FGD2     | 0.728052 | 1.350113  | 0.890968 | 1.31E-21 | 3.64E-20 |

| Gene     | conMean  | treatMean | logFC    | pValue   | FDR      |
|----------|----------|-----------|----------|----------|----------|
| SLC29A4  | 2.760075 | 1.536971  | -0.84462 | 0.014907 | 0.03023  |
| TCL1A    | 0.163884 | 0.256764  | 0.647768 | 7.80E-14 | 1.48E-12 |
| LGSN     | 0.470079 | 0.210433  | -1.15954 | 2.80E-07 | 2.14E-06 |
| CD1A     | 0.21218  | 1.288594  | 2.60244  | 2.04E-21 | 5.65E-20 |
| LGALS14  | 0.259853 | 0.405718  | 0.642786 | 0.000777 | 0.002378 |
| SPIRE2   | 2.031497 | 1.069383  | -0.92576 | 4.62E-11 | 6.53E-10 |
| SCN11A   | 0.128588 | 0.074199  | -0.79329 | 5.94E-07 | 4.23E-06 |
| CASC1    | 2.74113  | 1.199857  | -1.19191 | 6.48E-09 | 6.94E-08 |
| TCEAL5   | 1.891653 | 0.680776  | -1.4744  | 1.04E-05 | 5.40E-05 |
| TTLL10   | 0.893485 | 0.488498  | -0.87109 | 2.87E-05 | 0.000132 |
| LYZ      | 13.83425 | 74.59471  | 2.430829 | 1.27E-41 | 1.30E-39 |
| FAM117B  | 6.018127 | 3.946807  | -0.60863 | 1.47E-13 | 2.73E-12 |
| JAKMIP1  | 0.088496 | 0.189841  | 1.101112 | 5.36E-21 | 1.45E-19 |
| MEDAG    | 1.551005 | 2.862177  | 0.88391  | 4.65E-06 | 2.64E-05 |
| RP1      | 0.189166 | 0.112927  | -0.74427 | 0.000352 | 0.001195 |
| TUBA3E   | 0.35631  | 0.079488  | -2.16432 | 0.011859 | 0.024945 |
| ADGRG5   | 0.200525 | 0.451888  | 1.172184 | 1.06E-23 | 3.30E-22 |
| GRAP     | 0.124795 | 0.199973  | 0.680246 | 3.08E-12 | 4.99E-11 |
| FRZB     | 12.61759 | 5.882823  | -1.10086 | 0.018604 | 0.03644  |
| CFAP54   | 0.288068 | 0.180963  | -0.67071 | 0.000136 | 0.00052  |
| HLA-A    | 189.0387 | 337.2456  | 0.835118 | 3.47E-21 | 9.44E-20 |
| PTGDR    | 0.05282  | 0.154861  | 1.551822 | 1.40E-30 | 6.34E-29 |
| FREM2    | 0.331403 | 0.063318  | -2.38789 | 5.66E-07 | 4.05E-06 |
| GAREM2   | 3.004437 | 1.785142  | -0.75106 | 0.000664 | 0.002069 |
| CASR     | 0.228438 | 0.14667   | -0.63923 | 1.61E-06 | 1.03E-05 |
| AEBP1    | 49.4041  | 90.86265  | 0.879057 | 2.30E-07 | 1.80E-06 |
| C19orf44 | 3.537421 | 2.320997  | -0.60795 | 1.27E-09 | 1.51E-08 |
| HRK      | 0.860792 | 0.560079  | -0.62004 | 0.000576 | 0.001835 |
| SERPINI2 | 1.82801  | 0.589696  | -1.63223 | 2.03E-05 | 9.71E-05 |
| CCDC78   | 2.295318 | 1.464743  | -0.64805 | 9.58E-05 | 0.000381 |
| WFIKKN2  | 0.380454 | 0.159244  | -1.25648 | 1.22E-05 | 6.21E-05 |
| HLA-C    | 228.0127 | 456.9122  | 1.002803 | 1.68E-21 | 4.66E-20 |
| NCF2     | 1.584468 | 4.426577  | 1.482193 | 3.83E-42 | 4.21E-40 |
| PTAFR    | 3.020319 | 6.518972  | 1.109944 | 5.97E-29 | 2.45E-27 |
| FGL2     | 2.25097  | 8.026652  | 1.834251 | 1.13E-45 | 2.33E-43 |
| SMTNL2   | 1.164778 | 0.45665   | -1.35089 | 0.001925 | 0.005198 |
| SECTM1   | 10.23104 | 20.28313  | 0.987328 | 2.71E-15 | 5.64E-14 |
| TRAF1    | 1.096886 | 1.69854   | 0.630882 | 9.23E-15 | 1.86E-13 |
| PCDHGC4  | 0.139671 | 0.078976  | -0.82254 | 1.65E-05 | 8.10E-05 |
| ATP2A3   | 1.519908 | 2.516911  | 0.727671 | 1.95E-14 | 3.86E-13 |
| TCAP     | 1.209047 | 0.500242  | -1.27317 | 8.61E-07 | 5.91E-06 |
| FAM169A  | 0.38825  | 0.201216  | -0.94824 | 1.78E-07 | 1.43E-06 |
| GPLD1    | 0.444143 | 0.289705  | -0.61644 | 1.64E-06 | 1.05E-05 |
| HLA-DOA  | 7.406687 | 16.93376  | 1.193002 | 9.50E-20 | 2.42E-18 |
| NKX6-3   | 0.211515 | 0.104988  | -1.01054 | 0.001339 | 0.003792 |
| SVEP1    | 0.519495 | 1.027804  | 0.984384 | 1.76E-07 | 1.42E-06 |

| Gene      | conMean  | treatMean | logFC    | pValue   | FDR      |
|-----------|----------|-----------|----------|----------|----------|
| SIGLEC5   | 0.072201 | 0.197236  | 1.449833 | 2.73E-26 | 9.65E-25 |
| SIRPB2    | 0.228671 | 0.804634  | 1.815058 | 8.92E-40 | 7.53E-38 |
| SPP1      | 119.4698 | 310.6508  | 1.378648 | 9.21E-25 | 3.02E-23 |
| IGFL1     | 0.851083 | 2.14      | 1.330239 | 5.81E-05 | 0.000245 |
| GAL3ST1   | 2.2312   | 0.896392  | -1.31562 | 1.32E-08 | 1.32E-07 |
| MYLK2     | 0.535487 | 0.291152  | -0.87908 | 0.001859 | 0.005044 |
| C1QB      | 59.65439 | 204.5137  | 1.777497 | 1.42E-44 | 2.19E-42 |
| LAIR2     | 0.060227 | 0.184083  | 1.611879 | 2.80E-21 | 7.67E-20 |
| CYP27C1   | 0.130967 | 0.084059  | -0.63973 | 0.019171 | 0.037395 |
| KLHDC7B   | 1.18286  | 2.819591  | 1.253206 | 8.40E-23 | 2.50E-21 |
| LINC00514 | 0.220073 | 0.126621  | -0.79747 | 0.000417 | 0.001386 |
| FCRL5     | 0.057631 | 0.226641  | 1.97548  | 1.28E-19 | 3.24E-18 |
| LY9       | 0.052155 | 0.218446  | 2.06639  | 2.55E-42 | 2.89E-40 |
| ARID3C    | 0.859864 | 0.34725   | -1.30813 | 5.19E-07 | 3.73E-06 |
| CD1C      | 0.217245 | 1.069496  | 2.299538 | 9.96E-27 | 3.62E-25 |
| CELF3     | 0.187032 | 0.02308   | -3.0186  | 9.92E-07 | 6.71E-06 |
| RHOH      | 0.128087 | 0.477547  | 1.898514 | 2.33E-49 | 1.10E-46 |
| ZAP70     | 0.255099 | 0.813904  | 1.673801 | 2.12E-35 | 1.33E-33 |
| IQCA1     | 4.09414  | 2.689002  | -0.60649 | 4.86E-08 | 4.33E-07 |
| RGS20     | 0.384    | 0.183863  | -1.06247 | 0.00251  | 0.00656  |
| MSX1      | 20.53187 | 7.868059  | -1.38379 | 2.46E-05 | 0.000115 |
| SERPINA1  | 12.64574 | 30.08198  | 1.250248 | 6.68E-28 | 2.62E-26 |
| BPIFA2    | 0.306285 | 0.154315  | -0.98899 | 2.71E-06 | 1.63E-05 |
| TTPA      | 0.230589 | 0.390873  | 0.761376 | 0.000884 | 0.002656 |
| MICB      | 2.969867 | 5.165959  | 0.798638 | 1.88E-12 | 3.10E-11 |
| NEK10     | 0.146282 | 0.083419  | -0.8103  | 6.06E-05 | 0.000255 |
| SOX3      | 1.133562 | 0.114306  | -3.30989 | 5.18E-09 | 5.64E-08 |
| GALNT17   | 7.45893  | 4.570689  | -0.70656 | 0.000682 | 0.002117 |
| STAP1     | 0.122137 | 0.350639  | 1.521488 | 3.83E-22 | 1.10E-20 |
| MNS1      | 3.634549 | 2.36759   | -0.61836 | 3.83E-07 | 2.84E-06 |
| SMIM6     | 1.457625 | 0.578679  | -1.33278 | 0.000251 | 0.000889 |
| PLCB4     | 2.526095 | 1.464808  | -0.7862  | 4.02E-09 | 4.48E-08 |
| VCAM1     | 2.123293 | 6.139369  | 1.531787 | 5.32E-22 | 1.52E-20 |
| GPR87     | 0.369069 | 0.613558  | 0.733311 | 0.000587 | 0.001864 |
| GPR141    | 0.458008 | 1.093892  | 1.256025 | 3.48E-25 | 1.18E-23 |
| SLC6A13   | 1.72373  | 0.727654  | -1.24421 | 7.78E-07 | 5.41E-06 |
| PGR       | 0.985429 | 0.644415  | -0.61276 | 0.012    | 0.025196 |
| CFAP61    | 0.338268 | 0.146469  | -1.20757 | 2.27E-07 | 1.78E-06 |
| PRRT2     | 1.274115 | 0.804368  | -0.66357 | 0.002426 | 0.006372 |
| CAMK2B    | 0.631707 | 0.356982  | -0.8234  | 1.27E-08 | 1.27E-07 |
| CD1D      | 0.433486 | 0.807841  | 0.898085 | 6.69E-25 | 2.21E-23 |
| ARC       | 1.64176  | 1.065345  | -0.62392 | 0.000369 | 0.001245 |
| GNA15     | 1.447738 | 3.890132  | 1.426019 | 3.04E-43 | 3.99E-41 |
| GAD1      | 0.325422 | 0.199081  | -0.70896 | 1.85E-05 | 8.95E-05 |
| APOBEC3A  | 0.44543  | 0.996489  | 1.161655 | 4.56E-14 | 8.82E-13 |



| Gene     | conMean  | treatMean | logFC    | pValue   | FDR      |
|----------|----------|-----------|----------|----------|----------|
| CFAP161  | 0.753149 | 0.323342  | -1.21987 | 0.0002   | 0.000731 |
| FAM155B  | 2.393058 | 1.209999  | -0.98385 | 4.40E-08 | 3.96E-07 |
| NME8     | 0.220533 | 0.345043  | 0.645784 | 3.19E-13 | 5.68E-12 |
| SCN5A    | 0.722023 | 0.399193  | -0.85496 | 2.01E-09 | 2.34E-08 |
| DRC3     | 1.260414 | 0.775655  | -0.70041 | 5.14E-10 | 6.50E-09 |
| CCL22    | 0.193594 | 0.624258  | 1.689108 | 5.74E-31 | 2.68E-29 |
| GCSAM    | 0.172589 | 0.263447  | 0.610173 | 7.20E-10 | 8.91E-09 |
| LOX      | 5.231193 | 10.94669  | 1.065283 | 6.36E-10 | 7.91E-09 |
| GPX3     | 102.1739 | 240.1868  | 1.23313  | 2.16E-09 | 2.51E-08 |
| LGALS1   | 204.9425 | 314.2719  | 0.616795 | 1.72E-14 | 3.42E-13 |
| GLP1R    | 0.23545  | 0.114492  | -1.04018 | 5.95E-05 | 0.000251 |
| NKG7     | 3.322437 | 15.95923  | 2.264077 | 2.98E-46 | 7.38E-44 |
| AQP9     | 3.24685  | 5.354984  | 0.721842 | 6.70E-09 | 7.14E-08 |
| HCK      | 2.2858   | 6.559244  | 1.52083  | 3.28E-45 | 5.74E-43 |
| NLRP3    | 0.33149  | 0.869948  | 1.391966 | 2.14E-35 | 1.34E-33 |
| SCGB3A1  | 16.92556 | 4.297188  | -1.97774 | 3.57E-05 | 0.00016  |
| CHST11   | 2.964851 | 4.737432  | 0.676146 | 2.17E-17 | 5.06E-16 |
| PPARGC1A | 0.286326 | 0.113903  | -1.32986 | 0.001738 | 0.004756 |
| KRTAP5-1 | 0.423535 | 0.255035  | -0.73178 | 1.71E-05 | 8.39E-05 |
| MYOG     | 0.442305 | 0.094852  | -2.2213  | 0.000457 | 0.0015   |
| XIRP1    | 0.046201 | 0.18151   | 1.974054 | 1.63E-11 | 2.43E-10 |
| ZNF366   | 0.144677 | 0.219869  | 0.603815 | 4.35E-07 | 3.18E-06 |
| PRR29    | 1.485316 | 0.913178  | -0.7018  | 0.001637 | 0.004516 |
| IL6      | 0.957876 | 1.912865  | 0.997825 | 3.79E-08 | 3.46E-07 |
| HELT     | 0.173758 | 0.026979  | -2.68719 | 0.000757 | 0.002325 |
| ADGRG2   | 5.92417  | 3.779148  | -0.64855 | 0.006936 | 0.015709 |
| STEAP4   | 0.588482 | 1.024875  | 0.800378 | 3.15E-09 | 3.56E-08 |
| ACTC1    | 1.300845 | 0.143421  | -3.18112 | 0.01053  | 0.022483 |
| MS4A8    | 1.423702 | 0.512908  | -1.47288 | 0.002688 | 0.006966 |
| GPR84    | 0.600722 | 2.324743  | 1.952301 | 4.27E-45 | 7.38E-43 |
| PILRA    | 4.273242 | 7.654246  | 0.840929 | 1.56E-23 | 4.80E-22 |
| KCNRG    | 0.585071 | 0.30874   | -0.92222 | 4.21E-07 | 3.09E-06 |
| SMIM2    | 0.140646 | 0.065468  | -1.10322 | 0.020292 | 0.03913  |
| HNMT     | 3.277053 | 5.322472  | 0.699697 | 3.11E-20 | 8.13E-19 |
| SGSM1    | 0.437645 | 0.287162  | -0.6079  | 1.38E-06 | 8.98E-06 |
| CD3D     | 0.824261 | 4.328164  | 2.392582 | 4.17E-47 | 1.21E-44 |
| MAPK8IP1 | 26.17284 | 13.15353  | -0.99262 | 5.08E-14 | 9.76E-13 |
| MILR1    | 1.631202 | 3.777325  | 1.211429 | 4.38E-33 | 2.30E-31 |
| GLII     | 0.594839 | 0.229122  | -1.37638 | 5.32E-08 | 4.70E-07 |
| SLCO2B1  | 1.986669 | 5.759345  | 1.535553 | 1.02E-30 | 4.68E-29 |
| SAMSN1   | 0.973528 | 3.091836  | 1.667169 | 7.76E-50 | 3.93E-47 |
| ADAMTS19 | 0.214774 | 0.054345  | -1.9826  | 1.52E-09 | 1.80E-08 |
| CCR4     | 0.103582 | 0.405294  | 1.968196 | 5.43E-36 | 3.56E-34 |
| HMOX1    | 8.71964  | 17.78931  | 1.02867  | 4.49E-29 | 1.86E-27 |
| NEXN     | 1.435007 | 2.333508  | 0.701443 | 8.85E-09 | 9.20E-08 |
| DAND5    | 0.940311 | 0.253307  | -1.89225 | 0.025496 | 0.04749  |

| Gene    | conMean  | treatMean | logFC    | pValue   | FDR      |
|---------|----------|-----------|----------|----------|----------|
| SIT1    | 0.695824 | 2.668296  | 1.939125 | 3.94E-43 | 5.08E-41 |
| PLN     | 0.707365 | 1.347095  | 0.929325 | 3.68E-11 | 5.26E-10 |
| MUC5AC  | 0.254581 | 0.078181  | -1.70324 | 8.64E-06 | 4.59E-05 |
| ARRDC5  | 0.086537 | 0.22407   | 1.372568 | 1.23E-24 | 4.01E-23 |
| IL1B    | 1.579187 | 4.019721  | 1.347914 | 1.03E-25 | 3.57E-24 |
| BTK     | 0.481862 | 1.562573  | 1.697233 | 1.04E-49 | 5.08E-47 |
| CLUL1   | 2.137374 | 1.287857  | -0.73087 | 2.06E-06 | 1.28E-05 |
| METTL24 | 2.67075  | 1.609809  | -0.73036 | 0.001581 | 0.004381 |
| KLHDC8A | 7.243874 | 4.794124  | -0.59549 | 1.96E-07 | 1.56E-06 |
| KCNJ4   | 0.534089 | 0.264556  | -1.01351 | 4.34E-05 | 0.00019  |
| FAM161A | 1.965303 | 1.302828  | -0.5931  | 1.17E-09 | 1.39E-08 |
| AMBP    | 1.446593 | 0.140738  | -3.36158 | 0.006056 | 0.013993 |
| JPH4    | 1.041687 | 0.433388  | -1.26519 | 1.08E-06 | 7.20E-06 |
| UPK2    | 6.163724 | 2.763045  | -1.15754 | 0.001734 | 0.004745 |
| CCL4L2  | 2.127146 | 5.297673  | 1.316439 | 1.04E-24 | 3.42E-23 |
| CENPV   | 5.649983 | 3.026423  | -0.90063 | 2.71E-05 | 0.000126 |
| CFAP69  | 0.786987 | 0.499588  | -0.6556  | 2.21E-08 | 2.12E-07 |
| GJA5    | 2.779807 | 5.347337  | 0.943836 | 3.56E-08 | 3.26E-07 |
| GRIN2C  | 0.322617 | 0.193288  | -0.73907 | 0.001011 | 0.002984 |
| LIN28A  | 0.192965 | 0.049335  | -1.96766 | 0.000905 | 0.002708 |
| HSPA6   | 1.617176 | 2.455097  | 0.602303 | 2.33E-08 | 2.22E-07 |
| SASH3   | 1.861496 | 6.532201  | 1.811106 | 5.54E-53 | 9.82E-50 |
| TUBB8B  | 0.328544 | 0.168279  | -0.96523 | 1.85E-06 | 1.16E-05 |
| ZNF804A | 0.088239 | 0.150659  | 0.771792 | 1.62E-19 | 4.07E-18 |
| GBP4    | 4.441136 | 13.87477  | 1.643463 | 1.42E-29 | 6.05E-28 |
| ASGR2   | 0.060044 | 0.180814  | 1.59042  | 2.64E-34 | 1.55E-32 |
| ANKDD1B | 0.19301  | 0.097994  | -0.9779  | 7.03E-06 | 3.83E-05 |
| LRRK2   | 0.156972 | 0.370099  | 1.237398 | 6.40E-24 | 2.02E-22 |
| PTGFR   | 0.096236 | 0.174627  | 0.859636 | 5.49E-10 | 6.89E-09 |
| DNAAF3  | 2.514293 | 1.594257  | -0.65727 | 1.61E-06 | 1.03E-05 |
| TAS1R1  | 0.319631 | 0.210316  | -0.60385 | 6.79E-06 | 3.70E-05 |
| PLAC8   | 0.388115 | 0.728758  | 0.908955 | 4.05E-16 | 8.89E-15 |
| TDO2    | 1.011345 | 2.461241  | 1.28311  | 4.66E-14 | 9.00E-13 |
| WIF1    | 1.255051 | 0.240575  | -2.38319 | 0.008247 | 0.018228 |
| HABP2   | 0.310267 | 0.062352  | -2.31501 | 0.002666 | 0.006918 |
| ACP5    | 10.3651  | 17.94472  | 0.791826 | 1.75E-16 | 3.90E-15 |
| SLC28A3 | 1.718148 | 3.215371  | 0.904131 | 7.01E-12 | 1.09E-10 |
| SNX10   | 4.09392  | 6.718964  | 0.714756 | 4.36E-22 | 1.25E-20 |
| ZNF711  | 2.03655  | 1.136019  | -0.84214 | 6.47E-11 | 9.04E-10 |
| MUC6    | 1.925904 | 0.758637  | -1.34405 | 0.000211 | 0.000764 |
| GABRE   | 2.878655 | 5.436673  | 0.917329 | 6.13E-09 | 6.58E-08 |
| IL2RB   | 1.134478 | 5.022469  | 2.146368 | 1.93E-45 | 3.69E-43 |
| LILRA6  | 0.210562 | 0.481868  | 1.194396 | 5.40E-25 | 1.81E-23 |
| COL9A2  | 21.48385 | 10.42724  | -1.0429  | 5.17E-05 | 0.000222 |
| PRDM8   | 0.170622 | 0.318986  | 0.902693 | 3.01E-20 | 7.88E-19 |

| Gene       | conMean  | treatMean | logFC    | pValue   | FDR      |
|------------|----------|-----------|----------|----------|----------|
| ANKLE1     | 2.162064 | 1.151188  | -0.90929 | 1.18E-07 | 9.83E-07 |
| TNFRSF17   | 0.240674 | 0.89595   | 1.896335 | 2.26E-14 | 4.44E-13 |
| VNN3       | 0.212623 | 0.519236  | 1.288094 | 1.24E-11 | 1.88E-10 |
| FRRS1L     | 0.608838 | 0.316986  | -0.94164 | 1.13E-07 | 9.46E-07 |
| MEF2C      | 1.002253 | 1.774276  | 0.823984 | 1.28E-23 | 3.96E-22 |
| MARCHF11   | 0.358265 | 0.096983  | -1.88522 | 8.76E-09 | 9.14E-08 |
| CORO2B     | 4.283603 | 2.41233   | -0.8284  | 3.25E-05 | 0.000147 |
| AC005041.1 | 6.636183 | 4.336437  | -0.61384 | 4.95E-11 | 6.98E-10 |
| OIT3       | 0.156843 | 0.092882  | -0.75585 | 0.003868 | 0.009518 |
| UBD        | 1.343837 | 6.964636  | 2.37369  | 9.29E-28 | 3.58E-26 |
| COL11A2    | 1.136825 | 0.645698  | -0.81608 | 0.01108  | 0.023494 |
| MYOZ3      | 0.219699 | 0.11004   | -0.9975  | 0.000235 | 0.000839 |
| PCDHB11    | 2.904069 | 1.483144  | -0.96942 | 3.57E-05 | 0.00016  |
| OTOS       | 0.488551 | 0.106601  | -2.19628 | 1.83E-05 | 8.87E-05 |
| EDN3       | 3.77358  | 0.561853  | -2.74767 | 7.81E-08 | 6.72E-07 |
| CCL17      | 0.285068 | 1.17484   | 2.043085 | 6.01E-21 | 1.62E-19 |
| TMEM156    | 0.116662 | 0.395547  | 1.761515 | 9.26E-39 | 7.21E-37 |
| GPR174     | 0.066475 | 0.28736   | 2.111983 | 3.83E-33 | 2.02E-31 |
| NCR3       | 0.130487 | 0.568435  | 2.123094 | 1.54E-38 | 1.17E-36 |
| EZHIP      | 0.381277 | 0.110026  | -1.793   | 0.000368 | 0.001241 |
| ATRNL1     | 0.296865 | 0.189719  | -0.64595 | 0.000119 | 0.000461 |
| FEZF2      | 0.154116 | 0.416821  | 1.435409 | 0.002233 | 0.005919 |
| SBK3       | 0.23234  | 0.114887  | -1.01602 | 1.14E-06 | 7.56E-06 |
| PRKCG      | 1.418627 | 0.540842  | -1.39122 | 0.003801 | 0.009368 |
| SNX31      | 0.296909 | 0.481781  | 0.698359 | 0.000207 | 0.00075  |
| CCDC187    | 0.52155  | 0.31459   | -0.72934 | 3.44E-06 | 2.02E-05 |
| MARCHF4    | 0.169005 | 0.04446   | -1.92649 | 0.000317 | 0.001094 |
| NPW        | 21.90456 | 13.7928   | -0.66732 | 0.001021 | 0.00301  |
| HLA-DOB    | 1.490474 | 2.648674  | 0.829499 | 2.41E-12 | 3.93E-11 |
| FLI1       | 0.69187  | 1.377894  | 0.993892 | 1.29E-33 | 7.24E-32 |
| SLC9A4     | 1.504285 | 0.908227  | -0.72795 | 0.001622 | 0.004478 |
| IL32       | 15.07656 | 31.01188  | 1.040513 | 4.15E-20 | 1.07E-18 |
| DNAH9      | 0.238674 | 0.11257   | -1.08422 | 1.29E-05 | 6.51E-05 |
| TNNC2      | 1.384393 | 0.855498  | -0.69442 | 0.000755 | 0.002319 |
| CXCR1      | 0.060632 | 0.16306   | 1.42726  | 9.41E-05 | 0.000375 |
| CATSPERD   | 0.308368 | 0.108804  | -1.50293 | 0.00673  | 0.015307 |
| CYTH4      | 1.017597 | 2.95306   | 1.537045 | 8.23E-43 | 9.88E-41 |
| IL5RA      | 0.414248 | 0.172219  | -1.26625 | 0.001202 | 0.003457 |
| COL10A1    | 5.43317  | 12.22417  | 1.16987  | 4.43E-12 | 7.09E-11 |
| NPHS1      | 0.861446 | 0.172964  | -2.31629 | 0.003052 | 0.007774 |
| CST11      | 0.174769 | 0.116506  | -0.58505 | 0.004736 | 0.011344 |
| GIMAP8     | 0.620874 | 1.493204  | 1.266038 | 1.28E-30 | 5.84E-29 |
| AIF1       | 7.361899 | 23.09317  | 1.649317 | 3.76E-53 | 7.61E-50 |
| FAS        | 3.992714 | 6.3312    | 0.665109 | 3.09E-16 | 6.83E-15 |
| PSTPIP1    | 0.660095 | 1.206823  | 0.870468 | 1.84E-26 | 6.58E-25 |
| TIMP3      | 2.609338 | 3.977649  | 0.608232 | 0.005054 | 0.011982 |

| Gene     | conMean  | treatMean | logFC    | pValue   | FDR      |
|----------|----------|-----------|----------|----------|----------|
| SIAH3    | 0.998181 | 0.556447  | -0.84306 | 8.43E-05 | 0.000341 |
| APOL1    | 25.0065  | 50.41269  | 1.011484 | 3.07E-18 | 7.41E-17 |
| TNFSF14  | 0.894515 | 1.51061   | 0.755954 | 7.20E-14 | 1.37E-12 |
| TDRD12   | 1.051475 | 0.323093  | -1.70239 | 0.000183 | 0.000675 |
| TP53TG3D | 0.429221 | 0.226677  | -0.92108 | 5.42E-05 | 0.000231 |
| DCAF12L1 | 1.516648 | 0.827259  | -0.87448 | 3.45E-06 | 2.02E-05 |
| CCR2     | 0.169341 | 0.830149  | 2.29344  | 3.85E-38 | 2.90E-36 |
| PTGIS    | 5.327165 | 10.33241  | 0.955738 | 1.18E-06 | 7.80E-06 |
| BRSK2    | 0.600409 | 0.218171  | -1.46048 | 7.50E-08 | 6.49E-07 |
| CLIC2    | 1.276108 | 2.424132  | 0.925718 | 1.16E-26 | 4.18E-25 |
| PDLIM3   | 2.23599  | 4.501275  | 1.00942  | 2.09E-10 | 2.74E-09 |
| HAMP     | 0.36725  | 0.967183  | 1.397026 | 9.13E-23 | 2.71E-21 |
| SYP      | 0.926478 | 0.505413  | -0.87429 | 0.004387 | 0.010615 |
| GNB4     | 2.206101 | 3.685202  | 0.740245 | 1.01E-20 | 2.70E-19 |
| GSTA3    | 0.344977 | 0.146737  | -1.23327 | 0.001817 | 0.004943 |
| PRR36    | 15.80539 | 9.480348  | -0.7374  | 8.61E-06 | 4.57E-05 |
| LBX2     | 0.561734 | 0.286598  | -0.97086 | 0.019855 | 0.038459 |
| CCL26    | 0.223888 | 0.453096  | 1.017037 | 1.12E-10 | 1.51E-09 |
| TM4SF4   | 0.658378 | 0.241213  | -1.44861 | 0.005869 | 0.013615 |
| APOC1    | 16.94357 | 46.43472  | 1.454466 | 5.41E-32 | 2.66E-30 |
| PLEKHG4B | 3.992978 | 2.211857  | -0.85221 | 1.48E-12 | 2.50E-11 |
| MDFIC    | 2.270483 | 3.600104  | 0.665039 | 8.77E-15 | 1.77E-13 |
| TOGARAM2 | 0.159504 | 0.08384   | -0.92788 | 1.37E-05 | 6.89E-05 |
| DMKN     | 24.44581 | 14.38092  | -0.76543 | 1.10E-08 | 1.11E-07 |
| ARSI     | 0.547267 | 0.825558  | 0.593123 | 8.69E-06 | 4.60E-05 |
| PPM1E    | 0.289342 | 0.129196  | -1.16321 | 1.08E-05 | 5.59E-05 |
| NUGGC    | 0.179093 | 0.369604  | 1.045273 | 1.86E-15 | 3.91E-14 |
| MYCN     | 11.55003 | 7.038302  | -0.7146  | 0.004839 | 0.011555 |
| FAM171A2 | 18.75453 | 10.05954  | -0.89868 | 4.89E-08 | 4.35E-07 |
| MT1G     | 76.15013 | 138.3855  | 0.861775 | 5.76E-05 | 0.000243 |
| FILIP1   | 2.710601 | 1.346097  | -1.00983 | 1.91E-05 | 9.21E-05 |
| HLA-E    | 112.0912 | 203.6155  | 0.861174 | 3.46E-30 | 1.53E-28 |
| IL4I1    | 25.46635 | 46.38793  | 0.865157 | 1.20E-12 | 2.02E-11 |
| GNGT1    | 1.229254 | 0.795994  | -0.62695 | 5.01E-07 | 3.62E-06 |
| USH1C    | 0.436684 | 0.143635  | -1.60419 | 7.69E-05 | 0.000314 |
| LST1     | 2.226571 | 7.536521  | 1.759075 | 4.91E-51 | 3.66E-48 |
| MEX3A    | 18.32754 | 10.25831  | -0.83722 | 4.99E-12 | 7.95E-11 |
| EPHA6    | 0.455052 | 0.284952  | -0.67531 | 0.018839 | 0.036829 |
| ADGRG3   | 0.278681 | 0.426844  | 0.615093 | 2.32E-07 | 1.81E-06 |
| LILRB5   | 0.235717 | 0.415198  | 0.816744 | 6.01E-13 | 1.04E-11 |
| TMEM272  | 0.128194 | 0.074333  | -0.78626 | 2.89E-05 | 0.000133 |
| NFAM1    | 0.686834 | 1.978089  | 1.526074 | 3.51E-39 | 2.83E-37 |
| DNALI1   | 12.08001 | 7.037065  | -0.77958 | 1.79E-06 | 1.13E-05 |
| ADRA2B   | 1.804984 | 1.126711  | -0.67987 | 0.000168 | 0.000627 |
| GAS2     | 0.628191 | 0.181798  | -1.78886 | 4.83E-09 | 5.31E-08 |

| Gene     | conMean  | treatMean | logFC    | pValue   | FDR      |
|----------|----------|-----------|----------|----------|----------|
| SERPINB8 | 2.05776  | 3.224499  | 0.648    | 7.10E-14 | 1.35E-12 |
| VGF      | 1.892532 | 0.171245  | -3.46619 | 2.52E-05 | 0.000118 |
| FOXP4    | 56.14222 | 33.03169  | -0.76524 | 9.33E-07 | 6.35E-06 |
| SNAI2    | 4.255725 | 7.068636  | 0.732027 | 1.24E-07 | 1.03E-06 |
| CLC      | 0.120473 | 0.246942  | 1.035458 | 3.95E-05 | 0.000175 |
| IDO1     | 5.06496  | 12.33198  | 1.283782 | 1.92E-18 | 4.67E-17 |
| NLGN3    | 1.388994 | 0.848117  | -0.7117  | 0.005802 | 0.013486 |
| RETREG1  | 2.654927 | 1.666348  | -0.67198 | 3.72E-07 | 2.77E-06 |
| KRTAP5-8 | 0.179037 | 0.111876  | -0.67836 | 0.00033  | 0.00113  |
| PAG1     | 0.724266 | 1.153712  | 0.671692 | 6.16E-17 | 1.41E-15 |
| PARP15   | 0.137356 | 0.36863   | 1.42425  | 2.05E-29 | 8.69E-28 |
| MCTP1    | 0.189187 | 0.377983  | 0.998509 | 7.33E-28 | 2.86E-26 |
| SIRPA    | 7.834282 | 13.4571   | 0.780495 | 5.34E-17 | 1.23E-15 |
| PIWIL1   | 0.343658 | 0.207354  | -0.72888 | 0.000498 | 0.001616 |
| FGFR1    | 18.81564 | 11.72805  | -0.68197 | 9.88E-09 | 1.01E-07 |
| LILRA5   | 0.299622 | 0.780485  | 1.381228 | 2.50E-30 | 1.12E-28 |
| IL17RD   | 5.166221 | 2.745805  | -0.91188 | 1.55E-05 | 7.70E-05 |
| C1QA     | 45.27682 | 150.1373  | 1.729438 | 1.10E-45 | 2.30E-43 |
| GBP5     | 0.959065 | 3.630007  | 1.920272 | 2.55E-36 | 1.71E-34 |
| INPP4B   | 0.379408 | 0.778976  | 1.037829 | 7.18E-15 | 1.45E-13 |
| CSF2RA   | 0.836659 | 2.394979  | 1.517301 | 4.98E-40 | 4.25E-38 |
| SUCNR1   | 0.35809  | 0.948172  | 1.404826 | 1.13E-25 | 3.89E-24 |
| KCNN3    | 1.116239 | 0.740677  | -0.59173 | 0.000449 | 0.001474 |
| CD2      | 1.365192 | 7.179632  | 2.394806 | 2.65E-50 | 1.56E-47 |
| MS4A4E   | 0.088327 | 0.20775   | 1.233923 | 8.31E-16 | 1.79E-14 |
| TPPP     | 2.037989 | 1.292713  | -0.65674 | 3.06E-06 | 1.82E-05 |
| LCN8     | 0.379156 | 0.098081  | -1.95074 | 0.000127 | 0.000487 |
| TEX46    | 0.169821 | 0.108433  | -0.64721 | 2.15E-07 | 1.69E-06 |
| TMEM145  | 0.962656 | 0.128615  | -2.90396 | 8.09E-07 | 5.61E-06 |
| DEUP1    | 0.604216 | 0.328023  | -0.88127 | 0.002661 | 0.006907 |
| CD72     | 0.838608 | 1.573831  | 0.908212 | 2.78E-25 | 9.50E-24 |
| SEMA6C   | 5.535501 | 2.810466  | -0.9779  | 3.47E-06 | 2.03E-05 |
| ARHGEF38 | 0.178551 | 0.099502  | -0.84354 | 0.001801 | 0.004908 |
| CLEC18B  | 1.749147 | 0.761755  | -1.19925 | 0.000105 | 0.000412 |
| H2BW1    | 0.376047 | 0.152928  | -1.29806 | 4.79E-06 | 2.71E-05 |
| TLR10    | 0.091341 | 0.303556  | 1.732623 | 2.16E-28 | 8.55E-27 |
| DCDC1    | 0.147652 | 0.088418  | -0.73978 | 3.05E-07 | 2.32E-06 |
| C19orf67 | 0.283495 | 0.184112  | -0.62274 | 0.002989 | 0.007628 |
| SLC6A3   | 0.168756 | 0.069621  | -1.27734 | 0.002883 | 0.007397 |
| DEFB126  | 2.220986 | 1.178581  | -0.91415 | 0.000463 | 0.001515 |
| PIH1D3   | 0.258837 | 0.094773  | -1.4495  | 0.000427 | 0.001412 |
| DEPP1    | 13.82092 | 22.7856   | 0.721269 | 9.50E-14 | 1.78E-12 |
| NANOS1   | 2.145324 | 1.152219  | -0.89678 | 1.18E-07 | 9.83E-07 |
| CLEC12A  | 0.254437 | 0.678376  | 1.414775 | 5.72E-19 | 1.41E-17 |
| NGB      | 0.686933 | 0.355156  | -0.95172 | 0.00701  | 0.015854 |
| CIDEC    | 0.185454 | 0.643348  | 1.794535 | 0.00011  | 0.000432 |

| Gene      | conMean  | treatMean | logFC    | pValue   | FDR      |
|-----------|----------|-----------|----------|----------|----------|
| LRRC75A   | 1.34844  | 0.880862  | -0.6143  | 1.65E-08 | 1.62E-07 |
| NEK5      | 0.977683 | 0.580697  | -0.75158 | 1.07E-07 | 9.00E-07 |
| KLRB1     | 0.362834 | 1.415779  | 1.964213 | 7.01E-44 | 1.00E-41 |
| GAL3ST3   | 7.860554 | 3.174763  | -1.30798 | 2.77E-09 | 3.15E-08 |
| ALX3      | 0.424874 | 0.167281  | -1.34476 | 0.009433 | 0.020474 |
| NRXN2     | 2.204451 | 1.397379  | -0.6577  | 0.019658 | 0.038135 |
| GALNT13   | 0.64283  | 0.346449  | -0.89179 | 0.000563 | 0.001798 |
| APOL3     | 1.734103 | 5.045965  | 1.540941 | 1.43E-33 | 7.95E-32 |
| BMP6      | 2.473007 | 1.489781  | -0.73117 | 0.01606  | 0.03221  |
| PIEZO2    | 0.232368 | 0.355857  | 0.614889 | 0.000485 | 0.001577 |
| RETN      | 0.164344 | 0.395109  | 1.265529 | 3.73E-12 | 6.01E-11 |
| GDAP1     | 1.558161 | 0.912775  | -0.77151 | 1.01E-05 | 5.26E-05 |
| BEX1      | 16.78367 | 4.835798  | -1.79523 | 1.72E-08 | 1.67E-07 |
| CFB       | 16.19624 | 25.36874  | 0.647393 | 9.22E-10 | 1.11E-08 |
| LRRC14B   | 0.534482 | 0.244321  | -1.12937 | 9.95E-10 | 1.20E-08 |
| B4GALNT4  | 15.04085 | 9.027772  | -0.73644 | 1.67E-09 | 1.96E-08 |
| CLDN6     | 95.31784 | 49.89068  | -0.93398 | 0.00014  | 0.000534 |
| SCGB1D2   | 105.0811 | 40.98469  | -1.35835 | 0.00063  | 0.001979 |
| C1QC      | 72.40289 | 235.8056  | 1.703479 | 3.24E-45 | 5.73E-43 |
| SP140     | 0.22197  | 0.677353  | 1.609547 | 1.99E-37 | 1.41E-35 |
| PRB4      | 0.155229 | 0.10325   | -0.58826 | 0.001113 | 0.003234 |
| RASGRF2   | 0.44179  | 0.694727  | 0.653086 | 8.67E-08 | 7.40E-07 |
| CYBB      | 4.952377 | 18.66941  | 1.914483 | 5.74E-46 | 1.25E-43 |
| ADCYAP1R1 | 3.101011 | 1.286714  | -1.26905 | 3.71E-06 | 2.16E-05 |
| MEGF10    | 0.192354 | 0.337259  | 0.810097 | 0.000988 | 0.002924 |
| AP3B2     | 1.018406 | 0.654364  | -0.63815 | 2.06E-05 | 9.85E-05 |
| C10orf55  | 0.260568 | 0.528303  | 1.019707 | 9.43E-18 | 2.24E-16 |
| OAS2      | 16.15442 | 25.02632  | 0.631517 | 1.07E-08 | 1.08E-07 |
| CLECL1    | 0.183686 | 0.469127  | 1.352736 | 1.21E-29 | 5.19E-28 |
| RGS7BP    | 0.27757  | 0.1545    | -0.84524 | 0.000705 | 0.002183 |
| PLEK      | 2.652255 | 8.724862  | 1.717913 | 2.33E-47 | 7.03E-45 |
| MT1E      | 71.9049  | 110.1498  | 0.615305 | 2.28E-06 | 1.40E-05 |
| CAMKV     | 0.234508 | 0.031595  | -2.89187 | 6.78E-11 | 9.43E-10 |
| SMO       | 16.93275 | 9.774994  | -0.79265 | 2.55E-13 | 4.62E-12 |
| PCDHB9    | 0.897335 | 0.547348  | -0.71319 | 7.83E-05 | 0.000319 |
| UBASH3A   | 0.142892 | 0.495637  | 1.79436  | 5.89E-39 | 4.66E-37 |
| SERPINB5  | 1.250972 | 0.757633  | -0.72348 | 8.42E-07 | 5.80E-06 |
| CEP126    | 0.675397 | 0.390527  | -0.79031 | 9.42E-07 | 6.40E-06 |
| CCR1      | 2.471685 | 6.290572  | 1.347697 | 3.43E-39 | 2.78E-37 |
| DRAM1     | 3.049578 | 5.603415  | 0.877697 | 9.26E-30 | 4.01E-28 |
| ZNF683    | 0.346208 | 2.05893   | 2.572183 | 6.48E-41 | 6.12E-39 |
| PDCD1     | 0.468493 | 1.418373  | 1.598139 | 1.91E-26 | 6.84E-25 |
| GDAP1L1   | 0.249655 | 0.06423   | -1.95861 | 6.58E-06 | 3.60E-05 |
| KCNMB1    | 0.350751 | 0.611196  | 0.801188 | 2.13E-30 | 9.52E-29 |
| RSPH4A    | 1.602929 | 0.730398  | -1.13396 | 3.29E-07 | 2.48E-06 |

| Gene      | conMean  | treatMean | logFC    | pValue   | FDR      |
|-----------|----------|-----------|----------|----------|----------|
| ANK1      | 0.370756 | 0.16558   | -1.16294 | 0.014377 | 0.029361 |
| PEG10     | 27.47509 | 17.25596  | -0.67103 | 2.03E-07 | 1.61E-06 |
| TLR4      | 0.800563 | 2.196304  | 1.455991 | 1.59E-30 | 7.21E-29 |
| FAM166C   | 0.950038 | 0.41135   | -1.20762 | 2.84E-09 | 3.22E-08 |
| SFMBT2    | 0.476206 | 0.918424  | 0.947573 | 2.75E-26 | 9.68E-25 |
| SPATA46   | 0.142185 | 0.092367  | -0.62232 | 0.000329 | 0.001129 |
| CYYR1     | 12.24399 | 4.572956  | -1.42087 | 0.000113 | 0.000441 |
| C1orf189  | 1.82977  | 1.158865  | -0.65895 | 0.008081 | 0.017921 |
| BFSP1     | 0.587521 | 0.343262  | -0.77533 | 0.004538 | 0.010938 |
| GPR183    | 2.699143 | 8.887701  | 1.719309 | 6.03E-39 | 4.75E-37 |
| PTGIR     | 0.4985   | 0.954146  | 0.936617 | 2.38E-17 | 5.55E-16 |
| VEPH1     | 1.432974 | 0.944746  | -0.60101 | 4.37E-05 | 0.000191 |
| CXCL9     | 3.460244 | 25.3208   | 2.871377 | 3.06E-33 | 1.63E-31 |
| CRIP3     | 0.615216 | 0.384447  | -0.67831 | 0.002367 | 0.006225 |
| CHIT1     | 0.297486 | 0.565926  | 0.927792 | 3.92E-06 | 2.27E-05 |
| IRF4      | 0.200453 | 0.792665  | 1.983447 | 6.29E-29 | 2.56E-27 |
| OLFML1    | 2.623354 | 4.001244  | 0.609036 | 4.19E-08 | 3.78E-07 |
| JAML      | 0.180019 | 0.692298  | 1.943242 | 6.04E-43 | 7.64E-41 |
| NELL2     | 1.227915 | 0.701117  | -0.80848 | 0.003273 | 0.008253 |
| SAMD9L    | 3.391382 | 6.025487  | 0.829204 | 3.30E-14 | 6.43E-13 |
| MS4A6A    | 2.279699 | 7.839336  | 1.781888 | 1.75E-47 | 5.40E-45 |
| CAPN6     | 7.39864  | 1.980066  | -1.90171 | 0.000165 | 0.000619 |
| WFDC1     | 0.549598 | 0.290444  | -0.92011 | 0.001124 | 0.003258 |
| P2RY8     | 0.262609 | 0.756442  | 1.526315 | 5.62E-31 | 2.63E-29 |
| TNFRSF11A | 0.324141 | 0.681918  | 1.072978 | 1.11E-26 | 4.03E-25 |
| EMB       | 3.355338 | 5.114397  | 0.608106 | 2.43E-13 | 4.40E-12 |
| FUT7      | 0.06585  | 0.199616  | 1.599977 | 2.25E-32 | 1.13E-30 |
| ADAMTS9   | 3.249314 | 1.786452  | -0.86304 | 0.000125 | 0.000482 |
| SCARF1    | 1.029285 | 1.575932  | 0.614563 | 1.08E-17 | 2.56E-16 |
| LY86      | 3.069224 | 8.399024  | 1.452348 | 6.15E-42 | 6.60E-40 |
| IGFL3     | 0.077239 | 0.25643   | 1.731172 | 0.000222 | 0.000797 |
| IGF2BP1   | 0.796698 | 0.227348  | -1.80913 | 0.003756 | 0.009274 |
| LAIR1     | 1.420903 | 4.581528  | 1.68902  | 4.26E-50 | 2.32E-47 |
| TMEM163   | 0.814317 | 0.539377  | -0.5943  | 0.01956  | 0.037981 |
| VAT1L     | 0.244668 | 0.384538  | 0.652303 | 0.000119 | 0.00046  |
| SCUBE1    | 0.411513 | 0.227326  | -0.85617 | 0.009023 | 0.019736 |
| SAMD15    | 1.341363 | 0.821741  | -0.70694 | 3.06E-05 | 0.00014  |
| TNFRSF18  | 1.543883 | 4.078455  | 1.40146  | 8.92E-16 | 1.92E-14 |
| SAMD13    | 0.734153 | 0.466418  | -0.65446 | 3.14E-06 | 1.87E-05 |
| ASCL1     | 0.16295  | 0.066512  | -1.29275 | 0.008193 | 0.018138 |
| GALNT16   | 0.759159 | 0.461661  | -0.71757 | 0.000371 | 0.001248 |
| ESPNL     | 1.135809 | 0.610099  | -0.8966  | 0.000776 | 0.002377 |
| RSPH1     | 4.353212 | 2.391074  | -0.86442 | 3.95E-05 | 0.000175 |
| ENKUR     | 1.58721  | 0.75998   | -1.06246 | 1.39E-06 | 9.01E-06 |
| PTPN22    | 0.348401 | 1.16944   | 1.746997 | 6.39E-52 | 6.97E-49 |
| DGKG      | 1.151486 | 0.589864  | -0.96504 | 0.015375 | 0.031015 |

| Gene          | conMean  | treatMean | logFC    | pValue   | FDR      |
|---------------|----------|-----------|----------|----------|----------|
| STK36         | 8.765643 | 5.726621  | -0.61418 | 7.92E-10 | 9.75E-09 |
| FCMR          | 1.303488 | 2.444658  | 0.907255 | 1.01E-23 | 3.15E-22 |
| PRAP1         | 2.722768 | 1.106561  | -1.29899 | 7.01E-09 | 7.44E-08 |
| ANKRD66       | 0.347201 | 0.100072  | -1.79473 | 0.000782 | 0.002392 |
| FCER1A        | 0.399606 | 1.394811  | 1.803421 | 4.17E-16 | 9.14E-15 |
| MAB21L2       | 0.197065 | 0.299449  | 0.603641 | 1.43E-06 | 9.24E-06 |
| C16orf74      | 1.051911 | 0.693935  | -0.60014 | 0.022744 | 0.043072 |
| TNFRSF9       | 0.220594 | 0.647815  | 1.55419  | 2.61E-30 | 1.16E-28 |
| GASK1B        | 2.705793 | 4.119515  | 0.606423 | 2.65E-08 | 2.50E-07 |
| C11orf88      | 0.915884 | 0.371048  | -1.30356 | 0.007376 | 0.016569 |
| TM6SF1        | 0.408907 | 0.871579  | 1.091858 | 3.22E-24 | 1.04E-22 |
| CCR5          | 0.458109 | 1.990159  | 2.119122 | 9.99E-53 | 1.42E-49 |
| ZNF559-ZNF177 | 0.274461 | 0.165031  | -0.73386 | 5.20E-08 | 4.61E-07 |
| HLA-B         | 238.4393 | 507.4848  | 1.089742 | 5.19E-25 | 1.74E-23 |
| NTN3          | 0.681788 | 0.342283  | -0.99413 | 1.36E-06 | 8.88E-06 |
| TNFSF18       | 0.090686 | 0.199908  | 1.140383 | 8.78E-14 | 1.65E-12 |
| TIGD1         | 4.784664 | 3.116699  | -0.6184  | 7.38E-13 | 1.27E-11 |
| PLP1          | 0.177926 | 0.07714   | -1.20572 | 0.022174 | 0.042185 |
| GPC2          | 1.322599 | 0.662404  | -0.99759 | 1.74E-08 | 1.70E-07 |
| SIRPB1        | 0.245749 | 0.54122   | 1.139029 | 2.17E-18 | 5.27E-17 |
| CCDC181       | 0.996541 | 0.320232  | -1.63781 | 2.60E-17 | 6.05E-16 |
| FYB1          | 1.154746 | 4.226666  | 1.871944 | 3.32E-52 | 3.92E-49 |
| CPA3          | 0.249513 | 0.716993  | 1.522848 | 3.92E-13 | 6.91E-12 |
| CCDC113       | 2.74834  | 1.704489  | -0.68922 | 5.77E-07 | 4.12E-06 |
| PODXL2        | 30.8217  | 20.00914  | -0.62329 | 2.43E-07 | 1.89E-06 |
| PAK5          | 0.244157 | 0.112654  | -1.11591 | 0.000321 | 0.001106 |
| CCL13         | 0.421159 | 2.298707  | 2.448387 | 3.72E-18 | 8.93E-17 |
| APOA1         | 122.278  | 64.23377  | -0.92876 | 0.000611 | 0.001928 |
| CD53          | 6.099012 | 21.55064  | 1.821083 | 7.11E-56 | 1.01E-51 |
| GPR156        | 0.932651 | 0.593258  | -0.65268 | 1.17E-07 | 9.74E-07 |
| PRRT4         | 0.3882   | 0.104238  | -1.89691 | 0.003317 | 0.00835  |
| PIFO          | 5.78082  | 2.945605  | -0.97271 | 1.57E-06 | 1.01E-05 |
| FGF3          | 3.801299 | 0.522067  | -2.86419 | 9.45E-05 | 0.000377 |
| CD247         | 0.237225 | 0.926543  | 1.9656   | 3.60E-48 | 1.31E-45 |
| FLACC1        | 0.309693 | 0.143855  | -1.10622 | 3.52E-06 | 2.06E-05 |
| CLEC2B        | 2.05422  | 4.417626  | 1.104681 | 6.45E-27 | 2.39E-25 |
| CPLX2         | 3.029023 | 1.366831  | -1.14802 | 0.002002 | 0.005378 |
| NLGN1         | 0.326926 | 0.186044  | -0.81332 | 0.001666 | 0.004583 |
| VWA3A         | 1.807672 | 0.95876   | -0.91489 | 3.26E-09 | 3.68E-08 |
| KRTDAP        | 2.19645  | 0.625356  | -1.81242 | 3.18E-08 | 2.94E-07 |
| RNFT2         | 2.134853 | 1.293419  | -0.72295 | 1.54E-10 | 2.04E-09 |
| EBI3          | 1.180407 | 3.660623  | 1.632805 | 1.49E-34 | 8.96E-33 |
| FOXN1         | 0.785938 | 0.5227    | -0.58843 | 0.022495 | 0.042697 |
| SERPINB7      | 0.568418 | 1.2341    | 1.118434 | 3.45E-05 | 0.000156 |
| SLC66A1L      | 0.651993 | 1.063165  | 0.705438 | 0.001011 | 0.002984 |



| Gene     | conMean  | treatMean | logFC    | pValue   | FDR      |
|----------|----------|-----------|----------|----------|----------|
| CYP2W1   | 1.700859 | 0.607416  | -1.48551 | 1.85E-05 | 8.95E-05 |
| C5AR2    | 0.126285 | 0.19331   | 0.61423  | 7.72E-16 | 1.66E-14 |
| GAL3ST4  | 3.085488 | 6.705705  | 1.11989  | 2.07E-27 | 7.87E-26 |
| PPP1R32  | 1.924094 | 1.155143  | -0.73611 | 5.47E-05 | 0.000232 |
| DUSP19   | 1.329728 | 0.849955  | -0.64567 | 9.34E-11 | 1.28E-09 |
| CAMK4    | 0.114756 | 0.182625  | 0.670307 | 8.65E-10 | 1.05E-08 |
| NPPC     | 0.693741 | 0.357373  | -0.95696 | 0.00023  | 0.000823 |
| ANPEP    | 10.59441 | 19.11872  | 0.851683 | 2.66E-11 | 3.87E-10 |
| FZD2     | 16.55265 | 10.77215  | -0.61976 | 0.008999 | 0.019688 |
| SLC2A5   | 0.850786 | 1.899069  | 1.158425 | 7.80E-28 | 3.02E-26 |
| SLC25A27 | 2.5818   | 1.608468  | -0.68269 | 4.25E-06 | 2.44E-05 |
| MYO15A   | 0.267006 | 0.142583  | -0.90507 | 4.37E-05 | 0.000191 |
| FASLG    | 0.113914 | 0.640526  | 2.491307 | 7.22E-45 | 1.18E-42 |
| SIGLEC1  | 1.886067 | 5.206685  | 1.464984 | 9.57E-27 | 3.50E-25 |
| GABRG2   | 0.170169 | 0.05114   | -1.73446 | 0.00019  | 0.000697 |
| TMEM176B | 19.5368  | 39.53061  | 1.016776 | 3.09E-20 | 8.07E-19 |
| SDK2     | 2.309532 | 0.881283  | -1.38992 | 1.94E-11 | 2.84E-10 |
| GSDMA    | 0.250613 | 0.41772   | 0.737073 | 1.28E-13 | 2.38E-12 |
| AFAP1L2  | 9.845156 | 6.229831  | -0.66022 | 0.013331 | 0.027563 |
| THBS1    | 16.15375 | 29.32981  | 0.860499 | 1.05E-10 | 1.43E-09 |
| DHRS9    | 0.265248 | 0.614099  | 1.211129 | 1.13E-11 | 1.71E-10 |
| KYNU     | 0.157149 | 0.367986  | 1.227515 | 3.71E-32 | 1.85E-30 |
| KIAA0513 | 0.469439 | 0.713984  | 0.604953 | 1.63E-11 | 2.42E-10 |
| IGLL5    | 6.909335 | 20.84348  | 1.592977 | 3.34E-21 | 9.11E-20 |
| COL2A1   | 4.061582 | 0.546085  | -2.89485 | 3.06E-15 | 6.32E-14 |
| TCAF2    | 0.243677 | 0.376777  | 0.628739 | 8.23E-09 | 8.63E-08 |
| ADCY7    | 0.913902 | 1.453432  | 0.669353 | 6.56E-09 | 6.99E-08 |
| CASS4    | 0.410496 | 0.703432  | 0.777042 | 3.31E-22 | 9.62E-21 |
| HES6     | 12.07886 | 5.934796  | -1.02521 | 1.16E-05 | 5.93E-05 |
| RASGRP4  | 0.520366 | 0.823332  | 0.661948 | 1.24E-19 | 3.14E-18 |
| DDN      | 0.177883 | 0.090896  | -0.96864 | 6.58E-07 | 4.64E-06 |
| SIRPG    | 0.243814 | 1.145422  | 2.232023 | 1.26E-43 | 1.75E-41 |
| SV2C     | 0.570491 | 0.221236  | -1.36662 | 7.24E-11 | 1.00E-09 |
| GRIK5    | 8.096094 | 5.133468  | -0.65729 | 0.000205 | 0.000744 |
| TEKT1    | 1.47906  | 0.560533  | -1.39981 | 0.000153 | 0.000577 |
| SCTR     | 0.187154 | 0.056166  | -1.73644 | 0.006005 | 0.013891 |
| EOMES    | 0.144808 | 0.538758  | 1.895495 | 2.46E-33 | 1.34E-31 |
| STMND1   | 0.470294 | 0.166288  | -1.49988 | 7.42E-09 | 7.84E-08 |
| KMO      | 0.16529  | 0.309574  | 0.905286 | 2.26E-27 | 8.58E-26 |
| CCL18    | 1.466245 | 6.106165  | 2.05814  | 5.50E-13 | 9.60E-12 |
| GSDMC    | 0.731265 | 1.418103  | 0.955496 | 2.09E-14 | 4.14E-13 |
| KRT15    | 0.971796 | 1.885207  | 0.955997 | 0.000673 | 0.002093 |
| CFAP45   | 3.634255 | 1.764877  | -1.04209 | 3.15E-06 | 1.87E-05 |
| CBX2     | 6.814552 | 3.327508  | -1.03418 | 2.67E-09 | 3.05E-08 |
| LRRC23   | 6.377362 | 4.022977  | -0.6647  | 1.48E-07 | 1.21E-06 |
| CD40     | 6.685364 | 11.07592  | 0.728348 | 9.36E-14 | 1.76E-12 |

| Gene      | conMean  | treatMean | logFC    | pValue   | FDR      |
|-----------|----------|-----------|----------|----------|----------|
| ERFE      | 5.167656 | 2.244216  | -1.2033  | 0.012127 | 0.025407 |
| DYDC1     | 0.317935 | 0.170213  | -0.90139 | 5.92E-05 | 0.000249 |
| DLGAP3    | 2.653496 | 1.234494  | -1.10398 | 4.75E-05 | 0.000206 |
| SGK1      | 5.673904 | 8.65615   | 0.609384 | 8.42E-12 | 1.30E-10 |
| C2orf72   | 0.582822 | 0.348448  | -0.74211 | 2.79E-05 | 0.000129 |
| SELENOV   | 0.742603 | 0.173806  | -2.09511 | 4.97E-06 | 2.81E-05 |
| CST1      | 16.58688 | 9.192117  | -0.85157 | 0.02394  | 0.044983 |
| PCDHGA12  | 0.418116 | 0.72015   | 0.784394 | 1.70E-06 | 1.08E-05 |
| PHOX2A    | 11.45806 | 7.249487  | -0.66041 | 0.01265  | 0.026347 |
| CXCR2     | 0.101241 | 0.318403  | 1.653053 | 6.04E-15 | 1.23E-13 |
| TMEM232   | 0.195859 | 0.117013  | -0.74315 | 0.000273 | 0.000958 |
| CXCR6     | 0.268582 | 1.22412   | 2.188313 | 5.66E-46 | 1.25E-43 |
| PECAM1    | 4.688566 | 8.331005  | 0.829344 | 2.50E-23 | 7.61E-22 |
| LEFTY2    | 1.425013 | 0.455325  | -1.64601 | 8.20E-07 | 5.67E-06 |
| DCN       | 17.35628 | 33.87438  | 0.964737 | 1.46E-12 | 2.47E-11 |
| SIGLEC12  | 0.11265  | 0.385113  | 1.773429 | 1.05E-11 | 1.60E-10 |
| ITM2C     | 118.8687 | 63.35122  | -0.90792 | 1.23E-06 | 8.15E-06 |
| TRPS1     | 4.583485 | 7.683592  | 0.745336 | 3.55E-09 | 3.98E-08 |
| FXYD7     | 4.762746 | 1.796044  | -1.40697 | 6.48E-09 | 6.94E-08 |
| SSTR3     | 0.286466 | 0.136604  | -1.06837 | 0.001087 | 0.003173 |
| CXCR3     | 0.66846  | 2.918788  | 2.126457 | 3.74E-44 | 5.59E-42 |
| DPT       | 1.218558 | 1.862897  | 0.612373 | 1.55E-07 | 1.26E-06 |
| VAX2      | 5.830926 | 3.4179    | -0.77061 | 2.26E-08 | 2.16E-07 |
| GDF10     | 1.508849 | 0.188321  | -3.00218 | 6.59E-08 | 5.77E-07 |
| TACC1     | 3.306549 | 5.021538  | 0.602803 | 8.10E-12 | 1.25E-10 |
| LINGO1    | 12.47759 | 8.053899  | -0.63158 | 6.56E-05 | 0.000274 |
| FABP7     | 0.193178 | 0.028259  | -2.77314 | 2.81E-05 | 0.00013  |
| CD274     | 0.487772 | 1.117379  | 1.195839 | 5.79E-23 | 1.74E-21 |
| NOD2      | 0.564785 | 1.161997  | 1.040832 | 2.42E-25 | 8.34E-24 |
| CLDN19    | 1.55622  | 0.348206  | -2.16003 | 1.34E-06 | 8.78E-06 |
| NRAP      | 0.273099 | 0.107174  | -1.34947 | 6.40E-05 | 0.000267 |
| C2orf73   | 0.370306 | 0.162983  | -1.184   | 5.33E-06 | 2.99E-05 |
| GBP1      | 13.19256 | 27.87808  | 1.079406 | 7.87E-22 | 2.23E-20 |
| SMIM10L2A | 2.108534 | 1.301588  | -0.69597 | 2.61E-07 | 2.01E-06 |
| ARHGDIB   | 23.02697 | 51.30898  | 1.155887 | 2.12E-45 | 3.90E-43 |
| C20orf85  | 20.24492 | 5.736238  | -1.81938 | 0.000417 | 0.001385 |
| TLR1      | 0.954697 | 2.159494  | 1.177579 | 1.01E-30 | 4.65E-29 |
| TFEC      | 0.281967 | 1.044497  | 1.889212 | 5.71E-49 | 2.61E-46 |
| IOLL1     | 0.107496 | 0.365162  | 1.764255 | 5.46E-05 | 0.000232 |
| NPC1L1    | 0.224524 | 0.122614  | -0.87275 | 6.16E-05 | 0.000258 |
| RSPO4     | 5.390432 | 3.404324  | -0.66303 | 0.001981 | 0.005324 |
| TFPI2     | 8.501946 | 18.74594  | 1.140713 | 9.08E-08 | 7.72E-07 |
| ANKRD13B  | 3.715483 | 2.079741  | -0.83715 | 2.24E-09 | 2.59E-08 |
| PCSK9     | 0.561338 | 0.255229  | -1.13708 | 0.009349 | 0.020323 |
| RDH12     | 0.271929 | 0.155638  | -0.80503 | 4.08E-06 | 2.35E-05 |

| Gene     | conMean  | treatMean | logFC    | pValue   | FDR      |
|----------|----------|-----------|----------|----------|----------|
| MMP24    | 3.738821 | 2.344715  | -0.67317 | 0.023478 | 0.04422  |
| TMPRSS2  | 0.736788 | 0.414901  | -0.82848 | 0.000912 | 0.002725 |
| CD37     | 2.641654 | 7.697198  | 1.542892 | 1.47E-50 | 9.06E-48 |
| RIMKLA   | 0.992356 | 0.553797  | -0.8415  | 0.00032  | 0.001102 |
| CCDC178  | 0.246796 | 0.143072  | -0.78658 | 0.001169 | 0.003371 |
| ADAP2    | 2.07397  | 4.812431  | 1.214371 | 7.59E-38 | 5.55E-36 |
| LRRC55   | 1.976657 | 3.514348  | 0.830195 | 4.04E-06 | 2.33E-05 |
| GABRQ    | 0.52211  | 0.155779  | -1.74486 | 0.00567  | 0.013222 |
| SLC12A8  | 4.057398 | 6.115307  | 0.59187  | 1.26E-08 | 1.26E-07 |
| GRIN2A   | 1.225193 | 0.658898  | -0.89488 | 0.002224 | 0.005898 |
| TRO      | 4.884353 | 2.74332   | -0.83224 | 6.52E-09 | 6.96E-08 |
| LPXN     | 3.05298  | 6.318678  | 1.049405 | 7.23E-43 | 8.91E-41 |
| MPL      | 0.355706 | 0.237673  | -0.58171 | 1.25E-06 | 8.24E-06 |
| BATF3    | 0.427934 | 0.640401  | 0.581586 | 4.41E-17 | 1.02E-15 |
| ENPP3    | 0.952234 | 0.382098  | -1.31738 | 0.001285 | 0.003662 |
| MROH2A   | 0.451023 | 0.281718  | -0.67895 | 0.000201 | 0.000735 |
| PCDH8    | 0.468719 | 0.033468  | -3.80789 | 6.12E-05 | 0.000257 |
| GRB14    | 1.172869 | 0.62427   | -0.9098  | 0.000409 | 0.001363 |
| ADGRV1   | 0.173714 | 0.080592  | -1.10801 | 2.91E-07 | 2.21E-06 |
| PODN     | 2.891743 | 5.145358  | 0.831332 | 1.29E-08 | 1.28E-07 |
| IHH      | 2.028553 | 0.165311  | -3.61719 | 2.08E-06 | 1.29E-05 |
| RIPPLY1  | 0.656132 | 0.076566  | -3.09921 | 0.009145 | 0.01997  |
| CCL3     | 2.218007 | 4.978961  | 1.166581 | 8.76E-24 | 2.74E-22 |
| PSMB8    | 38.32048 | 65.80746  | 0.780136 | 1.45E-17 | 3.40E-16 |
| BCL2A1   | 1.650325 | 4.939747  | 1.581687 | 4.25E-35 | 2.62E-33 |
| CXCL13   | 1.371813 | 8.430766  | 2.61958  | 3.93E-27 | 1.48E-25 |
| NCKAP5   | 0.395084 | 0.256489  | -0.62326 | 2.95E-06 | 1.76E-05 |
| MARCHF10 | 0.287363 | 0.148153  | -0.95578 | 1.70E-06 | 1.08E-05 |
| LILRB1   | 0.634143 | 2.027593  | 1.676889 | 6.32E-44 | 9.13E-42 |
| EVPLL    | 0.209666 | 0.136947  | -0.61448 | 0.007922 | 0.017617 |
| RND2     | 1.848806 | 0.99284   | -0.89696 | 2.89E-10 | 3.74E-09 |
| TNIP3    | 0.136602 | 0.487124  | 1.834309 | 1.41E-29 | 6.04E-28 |
| SCUBE3   | 2.320298 | 1.282584  | -0.85526 | 0.001035 | 0.003045 |
| CLEC18A  | 0.240533 | 0.110982  | -1.11591 | 0.000263 | 0.000926 |
| HCLS1    | 3.229264 | 6.187041  | 0.938044 | 2.73E-29 | 1.14E-27 |
| KLHL13   | 0.764172 | 0.335868  | -1.186   | 0.000212 | 0.000768 |
| HLA-DPA1 | 31.4225  | 91.89776  | 1.548232 | 2.35E-36 | 1.59E-34 |
| TBX1     | 2.013928 | 0.659141  | -1.61135 | 7.86E-06 | 4.23E-05 |
| CRTAC1   | 17.94128 | 10.64856  | -0.75262 | 0.009426 | 0.020461 |
| PRF1     | 0.660871 | 2.679287  | 2.019409 | 9.60E-43 | 1.14E-40 |
| SEMA3D   | 0.425271 | 0.706774  | 0.732866 | 0.002356 | 0.006203 |
| MYL7     | 0.434943 | 0.207176  | -1.06997 | 2.54E-07 | 1.97E-06 |
| GZMK     | 0.308694 | 1.641872  | 2.411091 | 1.80E-42 | 2.08E-40 |
| UBE2L6   | 58.53392 | 91.62386  | 0.646451 | 8.03E-15 | 1.62E-13 |
| FCGR1B   | 0.152295 | 0.467313  | 1.617519 | 1.09E-43 | 1.53E-41 |
| CLEC7A   | 1.013798 | 3.155853  | 1.63826  | 6.30E-46 | 1.35E-43 |

| Gene       | conMean  | treatMean | logFC    | pValue   | FDR      |
|------------|----------|-----------|----------|----------|----------|
| G0S2       | 7.594759 | 12.1944   | 0.683142 | 5.12E-12 | 8.13E-11 |
| GFAP       | 1.194952 | 0.688495  | -0.79544 | 1.54E-05 | 7.64E-05 |
| ADAMTS18   | 0.278913 | 0.151714  | -0.87846 | 0.02672  | 0.049367 |
| C11orf53   | 0.237547 | 0.122072  | -0.96048 | 0.003152 | 0.007986 |
| THSD7B     | 0.420614 | 0.250944  | -0.74513 | 0.000128 | 0.000492 |
| DIO3       | 0.273346 | 0.534152  | 0.966522 | 5.17E-07 | 3.72E-06 |
| CCDC169    | 0.207965 | 0.114099  | -0.86605 | 2.62E-07 | 2.02E-06 |
| CCDC39     | 0.476957 | 0.273908  | -0.80017 | 0.00026  | 0.000915 |
| TUBA4B     | 2.113369 | 0.648768  | -1.70377 | 0.013613 | 0.028035 |
| GDF11      | 6.996197 | 4.090731  | -0.77421 | 5.46E-08 | 4.81E-07 |
| CASQ1      | 0.811795 | 0.355628  | -1.19075 | 7.65E-06 | 4.13E-05 |
| TNFSF12    | 6.436536 | 9.840029  | 0.612378 | 2.47E-22 | 7.22E-21 |
| MEST       | 64.57797 | 30.10167  | -1.1012  | 2.86E-09 | 3.24E-08 |
| GPM6A      | 0.769843 | 0.328382  | -1.22919 | 0.000364 | 0.00123  |
| PRDM1      | 1.348236 | 2.672242  | 0.986978 | 7.59E-25 | 2.51E-23 |
| PCDHA1     | 0.230377 | 0.11191   | -1.04166 | 3.23E-07 | 2.44E-06 |
| PNMA8C     | 0.194092 | 0.061362  | -1.66133 | 2.09E-13 | 3.82E-12 |
| IBSP       | 0.853861 | 2.33934   | 1.454029 | 3.66E-09 | 4.09E-08 |
| FOXN4      | 1.378542 | 0.37204   | -1.88961 | 9.22E-11 | 1.26E-09 |
| FCGR2A     | 3.700573 | 10.35572  | 1.484607 | 6.20E-43 | 7.77E-41 |
| SAXO2      | 0.971857 | 0.549654  | -0.82222 | 6.04E-06 | 3.34E-05 |
| STAB1      | 3.597249 | 8.283129  | 1.203282 | 8.36E-26 | 2.91E-24 |
| OR2L13     | 0.348893 | 0.144164  | -1.27507 | 0.000163 | 0.000611 |
| CD80       | 0.13659  | 0.422856  | 1.63032  | 5.19E-34 | 2.95E-32 |
| ZBTB8B     | 0.192332 | 0.095402  | -1.0115  | 9.20E-09 | 9.50E-08 |
| CSF2RB     | 0.584281 | 2.034749  | 1.800117 | 1.52E-40 | 1.38E-38 |
| JCHAIN     | 12.08754 | 69.37788  | 2.520955 | 3.16E-25 | 1.08E-23 |
| TGM5       | 0.083931 | 0.130084  | 0.632162 | 0.000729 | 0.002247 |
| AC136428.1 | 0.117566 | 0.351432  | 1.579771 | 1.15E-12 | 1.95E-11 |
| FGF9       | 1.749026 | 0.744337  | -1.23252 | 1.49E-09 | 1.76E-08 |
| GZMH       | 0.529947 | 2.654864  | 2.324717 | 1.65E-42 | 1.91E-40 |
| IL33       | 1.137033 | 1.818361  | 0.677365 | 2.30E-05 | 0.000108 |
| KAZALD1    | 5.760256 | 2.5492    | -1.17609 | 3.44E-10 | 4.43E-09 |
| OR2I1P     | 0.368067 | 2.685741  | 2.867281 | 1.71E-35 | 1.09E-33 |
| TCP11      | 0.643053 | 0.388781  | -0.72598 | 7.12E-05 | 0.000294 |
| FFAR4      | 0.214619 | 0.425002  | 0.985692 | 1.08E-23 | 3.35E-22 |
| NLRC3      | 0.465914 | 0.726542  | 0.640982 | 3.79E-10 | 4.86E-09 |
| RGS18      | 0.229465 | 0.744714  | 1.698414 | 4.56E-40 | 3.94E-38 |
| TPSAB1     | 1.84048  | 3.259137  | 0.824408 | 2.50E-12 | 4.07E-11 |
| MRO        | 0.144596 | 0.235778  | 0.705398 | 2.16E-13 | 3.95E-12 |
| MAP3K15    | 0.188214 | 0.100731  | -0.90187 | 7.59E-06 | 4.10E-05 |
| DACH1      | 6.011568 | 2.334909  | -1.36437 | 3.12E-08 | 2.88E-07 |
| PTPRE      | 0.994224 | 1.50854   | 0.601511 | 3.34E-16 | 7.36E-15 |
| SERPINA3   | 0.110008 | 0.300307  | 1.448837 | 0.001413 | 0.003969 |
| INSYN1     | 0.703414 | 0.325236  | -1.11289 | 0.017074 | 0.03392  |

| Gene      | conMean  | treatMean | logFC    | pValue   | FDR      |
|-----------|----------|-----------|----------|----------|----------|
| RD3       | 0.306049 | 0.131803  | -1.21537 | 0.000155 | 0.000583 |
| CHRN2     | 0.354334 | 0.063985  | -2.46931 | 0.000371 | 0.001248 |
| CLVS1     | 0.3332   | 0.148766  | -1.16334 | 1.71E-05 | 8.37E-05 |
| EMP3      | 11.48588 | 21.68559  | 0.916875 | 3.67E-31 | 1.73E-29 |
| C19orf38  | 1.137628 | 1.710566  | 0.588445 | 1.06E-15 | 2.27E-14 |
| DACH2     | 0.172    | 0.11337   | -0.60136 | 6.11E-06 | 3.37E-05 |
| GREM2     | 0.134343 | 0.203469  | 0.59888  | 0.000698 | 0.002163 |
| PLAAT4    | 49.30285 | 89.8563   | 0.865949 | 7.03E-15 | 1.42E-13 |
| GNB3      | 0.611841 | 0.334525  | -0.87104 | 0.006849 | 0.015541 |
| CIB3      | 0.070814 | 0.182073  | 1.362417 | 0.002668 | 0.006924 |
| ZEB2      | 0.573302 | 1.250302  | 1.12491  | 5.91E-30 | 2.59E-28 |
| SOSTDC1   | 7.116607 | 3.139457  | -1.18067 | 7.16E-08 | 6.23E-07 |
| TNNC1     | 8.938103 | 5.049287  | -0.82389 | 0.000215 | 0.000774 |
| GDPD2     | 2.326473 | 1.232815  | -0.91619 | 0.002316 | 0.006111 |
| ARHGEF4   | 1.662216 | 1.100507  | -0.59494 | 2.13E-06 | 1.32E-05 |
| ABCG8     | 0.354392 | 0.176943  | -1.00206 | 3.66E-05 | 0.000164 |
| OMD       | 0.681614 | 1.997222  | 1.550969 | 1.45E-08 | 1.43E-07 |
| ATOH7     | 0.335834 | 0.180925  | -0.89235 | 0.000812 | 0.00247  |
| ZNF483    | 0.184961 | 0.119049  | -0.63566 | 2.32E-07 | 1.81E-06 |
| ROPN1L    | 4.399085 | 1.750792  | -1.3292  | 4.77E-05 | 0.000206 |
| TNNT2     | 1.567772 | 0.676703  | -1.21212 | 2.54E-05 | 0.000118 |
| PEAK3     | 0.172347 | 0.363562  | 1.076881 | 6.52E-27 | 2.41E-25 |
| FBP1      | 6.234814 | 11.65581  | 0.902631 | 1.50E-13 | 2.79E-12 |
| KLRC1     | 0.050501 | 0.252231  | 2.320375 | 1.53E-29 | 6.48E-28 |
| AQP6      | 0.826937 | 0.544817  | -0.60201 | 0.021949 | 0.041818 |
| SAA4      | 0.201874 | 0.367325  | 0.863604 | 2.50E-06 | 1.52E-05 |
| ZNF729    | 0.176883 | 0.085454  | -1.04957 | 3.30E-07 | 2.48E-06 |
| WIPF1     | 2.824976 | 5.545081  | 0.97297  | 1.84E-33 | 1.01E-31 |
| PIK3AP1   | 1.928005 | 3.819789  | 0.986384 | 1.01E-30 | 4.65E-29 |
| FCN1      | 0.413403 | 1.524166  | 1.882401 | 7.82E-27 | 2.86E-25 |
| ASTL      | 0.905564 | 0.476237  | -0.92714 | 5.83E-07 | 4.15E-06 |
| LGALS2    | 1.278363 | 2.07563   | 0.699252 | 4.54E-13 | 7.96E-12 |
| FCER1G    | 37.44779 | 116.2286  | 1.634012 | 9.56E-53 | 1.42E-49 |
| EFNB3     | 6.663331 | 4.1642    | -0.6782  | 1.78E-07 | 1.43E-06 |
| DCAF12L2  | 0.815293 | 0.428376  | -0.92844 | 2.11E-07 | 1.66E-06 |
| TREM1     | 0.595603 | 1.362637  | 1.193978 | 2.79E-15 | 5.80E-14 |
| USP6      | 0.19308  | 0.117635  | -0.71488 | 2.11E-07 | 1.67E-06 |
| PTPN7     | 0.607406 | 1.633967  | 1.427645 | 1.16E-46 | 3.05E-44 |
| RIPK3     | 2.042112 | 3.281862  | 0.684453 | 6.07E-12 | 9.56E-11 |
| SPSB4     | 1.072538 | 0.32171   | -1.7372  | 0.000432 | 0.001426 |
| CA10      | 0.200436 | 0.025317  | -2.98498 | 0.004195 | 0.010204 |
| LRRC46    | 3.046104 | 1.580326  | -0.94674 | 0.000668 | 0.002081 |
| SAA2-SAA4 | 0.32938  | 0.711458  | 1.111025 | 8.53E-10 | 1.04E-08 |
| ZNF98     | 0.748643 | 0.48964   | -0.61256 | 1.49E-06 | 9.60E-06 |
| SLC38A8   | 0.565609 | 0.242644  | -1.22097 | 2.03E-07 | 1.61E-06 |
| NME9      | 0.480782 | 0.270295  | -0.83085 | 3.71E-08 | 3.39E-07 |

| Gene       | conMean  | treatMean | logFC    | pValue   | FDR      |
|------------|----------|-----------|----------|----------|----------|
| NXNL1      | 0.184399 | 0.03735   | -2.30366 | 1.78E-07 | 1.43E-06 |
| SKIDA1     | 0.781452 | 0.471834  | -0.72788 | 0.003128 | 0.007932 |
| TNNI1      | 1.778796 | 0.687717  | -1.37101 | 2.16E-12 | 3.54E-11 |
| IGLON5     | 4.801715 | 2.127198  | -1.1746  | 0.012902 | 0.026812 |
| CLEC4A     | 0.732355 | 2.498577  | 1.770492 | 5.28E-48 | 1.87E-45 |
| DPF1       | 1.183126 | 0.537585  | -1.13804 | 4.13E-05 | 0.000182 |
| DYNLRB2    | 0.756916 | 0.429545  | -0.81732 | 0.000791 | 0.00241  |
| IL2RG      | 2.968277 | 12.33192  | 2.0547   | 9.92E-51 | 6.39E-48 |
| CPB2       | 0.170489 | 0.095946  | -0.82938 | 5.93E-07 | 4.22E-06 |
| RASL11B    | 2.812986 | 1.77647   | -0.66309 | 3.16E-05 | 0.000144 |
| CCDC30     | 0.751761 | 0.473785  | -0.66604 | 3.55E-09 | 3.98E-08 |
| IL24       | 0.329907 | 0.523854  | 0.667107 | 3.21E-13 | 5.72E-12 |
| TMEM88     | 4.732714 | 2.989703  | -0.66267 | 0.004118 | 0.010034 |
| DOCK2      | 0.390288 | 1.236344  | 1.663471 | 4.09E-42 | 4.46E-40 |
| KLHL6      | 0.347193 | 0.62296   | 0.843403 | 8.69E-22 | 2.45E-20 |
| ONECUT2    | 0.497209 | 0.160809  | -1.62851 | 0.000169 | 0.000629 |
| SLAMF8     | 1.578326 | 6.672732  | 2.079883 | 7.63E-49 | 3.28E-46 |
| GJB2       | 6.04685  | 15.20369  | 1.330165 | 3.15E-13 | 5.62E-12 |
| PLA2G2D    | 0.219918 | 1.30361   | 2.567475 | 2.19E-29 | 9.19E-28 |
| AC003002.2 | 0.120343 | 0.080304  | -0.5836  | 0.001557 | 0.004324 |
| ICAM1      | 17.66027 | 31.68258  | 0.843182 | 4.31E-16 | 9.41E-15 |
| CD79B      | 0.693573 | 1.205483  | 0.797491 | 3.06E-13 | 5.47E-12 |
| CD27       | 1.159399 | 3.263425  | 1.493009 | 1.99E-33 | 1.09E-31 |
| MYH7B      | 1.003735 | 0.491224  | -1.03093 | 1.10E-05 | 5.67E-05 |
| CRMP1      | 4.621143 | 2.743223  | -0.75238 | 2.61E-05 | 0.000122 |
| FAM78A     | 0.754204 | 1.707724  | 1.179047 | 5.30E-36 | 3.50E-34 |
| HHATL      | 0.182705 | 0.038082  | -2.26234 | 1.43E-05 | 7.17E-05 |
| MDH1B      | 2.019287 | 1.321605  | -0.61155 | 2.12E-08 | 2.04E-07 |
| IGSF5      | 0.139349 | 0.074735  | -0.89885 | 1.31E-06 | 8.62E-06 |
| SLC28A2    | 0.462331 | 0.300774  | -0.62025 | 4.41E-05 | 0.000193 |
| SMTNL1     | 0.965626 | 1.579318  | 0.709765 | 0.017915 | 0.035289 |
| RPL3L      | 0.291228 | 0.183487  | -0.66647 | 2.38E-05 | 0.000112 |
| WDR35      | 3.073981 | 1.977992  | -0.63607 | 1.51E-12 | 2.54E-11 |
| GUCY1A1    | 1.086536 | 2.035525  | 0.905665 | 2.77E-11 | 4.01E-10 |
| DLEC1      | 0.656504 | 0.353656  | -0.89246 | 0.00017  | 0.000633 |
| EYA1       | 0.78414  | 0.281823  | -1.47632 | 0.006298 | 0.014452 |
| LAPTM5     | 28.40656 | 95.91171  | 1.755483 | 5.34E-51 | 3.79E-48 |
| COL3A1     | 164.3945 | 308.2926  | 0.907138 | 6.00E-09 | 6.45E-08 |
| FAM177B    | 0.192911 | 0.364876  | 0.919471 | 2.38E-13 | 4.32E-12 |
| RARRES1    | 22.48904 | 43.48828  | 0.951405 | 8.62E-11 | 1.18E-09 |
| PPP1R18    | 8.358263 | 13.72886  | 0.715937 | 2.06E-21 | 5.69E-20 |
| CD300LB    | 0.123998 | 0.293276  | 1.24194  | 1.02E-20 | 2.74E-19 |
| SLC13A4    | 0.645344 | 0.347725  | -0.89212 | 3.66E-05 | 0.000164 |
| DUOX1      | 1.577578 | 0.885468  | -0.8332  | 0.009764 | 0.021057 |
| ZNF20      | 0.40951  | 0.272416  | -0.58809 | 3.55E-06 | 2.07E-05 |

| Gene         | conMean  | treatMean | logFC    | pValue   | FDR      |
|--------------|----------|-----------|----------|----------|----------|
| RNF103-CHMP3 | 0.144985 | 0.094957  | -0.61055 | 2.93E-06 | 1.75E-05 |
| APOH         | 0.295016 | 0.058072  | -2.34488 | 0.01236  | 0.025819 |
| CSAG3        | 0.568282 | 0.951844  | 0.744119 | 3.84E-05 | 0.00017  |
| ADCY8        | 2.796589 | 0.77018   | -1.8604  | 2.96E-07 | 2.25E-06 |
| EPHA7        | 0.419856 | 0.145567  | -1.52821 | 9.58E-11 | 1.31E-09 |
| CCRL2        | 0.412819 | 1.052995  | 1.350917 | 2.26E-45 | 4.11E-43 |
| PDIA2        | 2.675838 | 0.869223  | -1.62219 | 5.63E-06 | 3.14E-05 |
| CPNE4        | 0.859793 | 0.44406   | -0.95323 | 0.000344 | 0.001172 |
| TNFRSF14     | 4.110684 | 6.954695  | 0.758609 | 1.39E-16 | 3.10E-15 |
| CCNO         | 10.41114 | 5.938257  | -0.81002 | 0.011624 | 0.024512 |
| REEP1        | 0.954561 | 0.59176   | -0.68983 | 9.60E-06 | 5.03E-05 |
| SNORC        | 2.309638 | 1.511469  | -0.61171 | 6.23E-05 | 0.000261 |
| SPOCD1       | 0.143196 | 0.299736  | 1.065696 | 8.28E-12 | 1.28E-10 |
| CTSG         | 0.065804 | 0.19435   | 1.562401 | 2.05E-06 | 1.28E-05 |
| ZNF219       | 12.00631 | 7.396418  | -0.69889 | 8.70E-10 | 1.06E-08 |
| LRRC71       | 0.70625  | 0.236236  | -1.57995 | 1.02E-06 | 6.85E-06 |
| FGR          | 1.001183 | 2.874997  | 1.521855 | 2.38E-43 | 3.21E-41 |
| SPTB         | 0.392182 | 0.193648  | -1.01809 | 0.000202 | 0.000735 |
| VDR          | 3.297019 | 5.546428  | 0.750397 | 7.90E-14 | 1.49E-12 |
| CD93         | 3.178409 | 5.100738  | 0.682401 | 2.55E-12 | 4.15E-11 |
| RAC2         | 5.818171 | 15.81117  | 1.442307 | 6.09E-47 | 1.69E-44 |
| ZNF423       | 4.154062 | 1.619031  | -1.35939 | 2.32E-09 | 2.67E-08 |
| NT5E         | 4.369367 | 7.080791  | 0.696486 | 7.62E-09 | 8.02E-08 |
| GSTM3        | 6.13847  | 3.813964  | -0.68659 | 0.000946 | 0.002813 |
| INPP5D       | 1.643537 | 3.504334  | 1.092336 | 7.41E-28 | 2.88E-26 |
| SLC37A2      | 0.831499 | 2.201253  | 1.404538 | 1.85E-34 | 1.11E-32 |
| FMNL1        | 3.456847 | 6.240697  | 0.852251 | 1.44E-27 | 5.52E-26 |
| NCF1         | 0.505794 | 1.7815    | 1.81647  | 2.63E-48 | 9.81E-46 |
| PHF21B       | 0.286614 | 0.045493  | -2.65539 | 8.72E-08 | 7.44E-07 |
| IRF1         | 8.123837 | 15.73792  | 0.954012 | 1.16E-24 | 3.79E-23 |
| ZNF727       | 0.595685 | 0.372249  | -0.67828 | 0.000131 | 0.000503 |
| IFNG         | 0.064269 | 0.335378  | 2.383593 | 2.47E-31 | 1.18E-29 |
| PRG4         | 0.499668 | 0.801338  | 0.681441 | 0.019463 | 0.037854 |
| SPNS3        | 0.20392  | 0.328838  | 0.68937  | 2.57E-07 | 1.99E-06 |
| PLA2G2A      | 2.066155 | 6.240198  | 1.594643 | 9.93E-07 | 6.71E-06 |
| OLR1         | 1.688243 | 5.80734   | 1.782355 | 8.99E-38 | 6.53E-36 |
| BICC1        | 1.301419 | 2.10463   | 0.693481 | 8.28E-07 | 5.72E-06 |
| CAPSL        | 5.245109 | 1.710936  | -1.61619 | 8.68E-06 | 4.60E-05 |
| GFY          | 0.193865 | 0.079097  | -1.29337 | 0.000783 | 0.002393 |
| ARRB1        | 1.771411 | 2.702603  | 0.609451 | 2.22E-14 | 4.38E-13 |
| ASCL5        | 0.429136 | 0.209121  | -1.0371  | 1.65E-12 | 2.75E-11 |
| GPR31        | 0.099928 | 0.157314  | 0.654691 | 1.98E-09 | 2.31E-08 |
| CYSLTR1      | 0.195891 | 0.765176  | 1.965741 | 3.43E-36 | 2.27E-34 |
| H2BW2        | 0.152227 | 0.051421  | -1.56578 | 4.79E-09 | 5.26E-08 |
| ELFN2        | 0.208172 | 0.121113  | -0.78142 | 0.023192 | 0.043754 |
| ASIC1        | 1.135649 | 0.723016  | -0.65142 | 0.018651 | 0.036512 |

| Gene    | conMean  | treatMean | logFC    | pValue   | FDR      |
|---------|----------|-----------|----------|----------|----------|
| ADGRE1  | 0.25265  | 0.589126  | 1.221437 | 3.66E-25 | 1.24E-23 |
| LILRA4  | 0.053626 | 0.216005  | 2.010063 | 1.44E-29 | 6.12E-28 |
| ADAMTS2 | 2.52632  | 4.949156  | 0.970145 | 6.03E-08 | 5.30E-07 |
| MYH6    | 0.443827 | 0.09315   | -2.25237 | 3.05E-08 | 2.83E-07 |
| TEX15   | 0.157005 | 0.065528  | -1.26064 | 0.000183 | 0.000676 |
| BATF2   | 2.651888 | 4.393525  | 0.728359 | 3.93E-13 | 6.91E-12 |
| KY      | 0.212545 | 0.103099  | -1.04374 | 5.28E-07 | 3.79E-06 |
| CXorf21 | 0.435146 | 1.280125  | 1.556714 | 7.73E-41 | 7.25E-39 |
| CDH22   | 1.185961 | 0.775671  | -0.61254 | 0.018675 | 0.036552 |
| TEKT3   | 0.23148  | 0.15356   | -0.59209 | 1.09E-05 | 5.64E-05 |
| XKR7    | 0.476476 | 0.11696   | -2.02639 | 0.007885 | 0.017551 |
| LIN28B  | 0.672484 | 0.306703  | -1.13266 | 0.001981 | 0.005324 |
| RASL10B | 3.811384 | 2.319263  | -0.71665 | 0.016184 | 0.032407 |
| MALL    | 0.474712 | 0.803896  | 0.759958 | 0.000205 | 0.000746 |
| SCT     | 1.140149 | 2.31253   | 1.02025  | 1.49E-09 | 1.76E-08 |
| FAM163A | 0.233372 | 0.1154    | -1.01598 | 0.000185 | 0.000682 |
| ELAVL3  | 0.359297 | 0.074968  | -2.26082 | 5.32E-12 | 8.44E-11 |
| SMCO2   | 0.152372 | 0.279659  | 0.876073 | 3.02E-10 | 3.89E-09 |
| TIMD4   | 0.203752 | 0.807362  | 1.986404 | 7.81E-25 | 2.57E-23 |
| NKPD1   | 0.272059 | 0.169084  | -0.68618 | 2.56E-06 | 1.55E-05 |
| DUSP10  | 3.857645 | 6.57423   | 0.769102 | 2.08E-11 | 3.04E-10 |
| TNNT3   | 1.53457  | 0.672549  | -1.19012 | 5.04E-07 | 3.63E-06 |
| PNMT    | 2.874923 | 0.743732  | -1.95067 | 4.66E-09 | 5.13E-08 |
| CRYGC   | 2.532213 | 0.816     | -1.63376 | 0.015213 | 0.030759 |
| CFAP157 | 2.682117 | 1.6757    | -0.67861 | 9.21E-05 | 0.000368 |
| NOVA1   | 0.836228 | 0.462051  | -0.85584 | 1.89E-06 | 1.19E-05 |
| IFFO1   | 0.761366 | 1.58357   | 1.056519 | 2.38E-29 | 9.99E-28 |
| NCAM1   | 3.758856 | 2.121717  | -0.82506 | 8.30E-05 | 0.000336 |
| CRYGB   | 1.993004 | 0.478011  | -2.05983 | 3.76E-05 | 0.000167 |
| CALN1   | 0.089041 | 0.201319  | 1.176944 | 0.010248 | 0.021966 |
| RIIAD1  | 0.421326 | 0.195548  | -1.10742 | 0.00142  | 0.003986 |
| GPR68   | 0.544773 | 1.144776  | 1.071339 | 1.29E-21 | 3.62E-20 |
| TNFAIP3 | 6.835699 | 12.1166   | 0.825824 | 4.11E-17 | 9.51E-16 |
| HLA-DMB | 9.642335 | 20.53784  | 1.09083  | 2.65E-25 | 9.06E-24 |
| HTR1D   | 0.137743 | 0.068857  | -1.00031 | 0.000141 | 0.000537 |
| KLHL38  | 0.147165 | 0.499132  | 1.761982 | 4.44E-08 | 4.00E-07 |
| MAFA    | 0.659584 | 0.299307  | -1.13993 | 4.36E-06 | 2.50E-05 |
| SOX11   | 3.032395 | 0.582965  | -2.37898 | 6.65E-05 | 0.000277 |
| CSRNP3  | 0.829931 | 0.489368  | -0.76207 | 6.03E-14 | 1.15E-12 |
| FAM216B | 1.465634 | 0.449775  | -1.70425 | 0.014646 | 0.029834 |
| TEX11   | 0.094206 | 0.160327  | 0.767119 | 2.70E-08 | 2.55E-07 |
| QPCT    | 4.440627 | 7.507423  | 0.757554 | 1.36E-07 | 1.12E-06 |
| SELE    | 0.075338 | 0.207326  | 1.460449 | 1.64E-11 | 2.43E-10 |
| GAS2L2  | 0.611088 | 0.302985  | -1.01213 | 1.59E-07 | 1.29E-06 |
| EVA1C   | 6.510749 | 10.8114   | 0.731658 | 6.11E-12 | 9.61E-11 |



| Gene     | conMean  | treatMean | logFC    | pValue   | FDR      |
|----------|----------|-----------|----------|----------|----------|
| LRRC31   | 0.384686 | 0.104319  | -1.88269 | 0.00086  | 0.002593 |
| DRD5     | 0.134331 | 0.077974  | -0.78473 | 0.001808 | 0.00492  |
| SLIT3    | 4.519206 | 2.938422  | -0.62103 | 0.000196 | 0.000717 |
| DHRS2    | 1.643098 | 0.293532  | -2.48483 | 0.000354 | 0.001201 |
| MYCBPAP  | 0.310155 | 0.201049  | -0.62544 | 0.000269 | 0.000946 |
| CATIP    | 0.487581 | 0.28895   | -0.75482 | 0.000748 | 0.002299 |
| COL11A1  | 4.347525 | 10.44793  | 1.264951 | 2.24E-07 | 1.76E-06 |
| GPR83    | 0.282161 | 0.095467  | -1.56344 | 1.19E-05 | 6.09E-05 |
| C5orf49  | 4.320941 | 2.228755  | -0.95511 | 9.60E-06 | 5.03E-05 |
| TCF7L1   | 11.61413 | 4.753126  | -1.28893 | 1.94E-10 | 2.55E-09 |
| SIM2     | 1.34949  | 0.607176  | -1.15223 | 9.81E-06 | 5.12E-05 |
| PDCL2    | 2.415149 | 1.524508  | -0.66377 | 0.001358 | 0.003834 |
| FCGR1A   | 0.998424 | 3.137733  | 1.651998 | 1.41E-47 | 4.44E-45 |
| MSTN     | 0.254105 | 0.040544  | -2.64787 | 4.59E-05 | 0.000199 |
| AGXT     | 0.195678 | 0.011625  | -4.07318 | 3.22E-05 | 0.000146 |
| SLC10A4  | 0.755868 | 0.345393  | -1.1299  | 0.00014  | 0.000534 |
| ODC1     | 89.57852 | 58.25621  | -0.62074 | 3.00E-08 | 2.79E-07 |
| ACSM3    | 3.807018 | 2.277142  | -0.74144 | 1.84E-08 | 1.79E-07 |
| CTNNA2   | 1.557545 | 0.616074  | -1.3381  | 6.38E-08 | 5.60E-07 |
| SLC26A10 | 0.291012 | 0.160898  | -0.85493 | 0.001285 | 0.003662 |
| CETP     | 0.312781 | 0.56687   | 0.857865 | 2.61E-13 | 4.70E-12 |
| IRX6     | 0.727537 | 0.486486  | -0.58062 | 0.010895 | 0.023139 |
| LRATD1   | 4.352689 | 1.745444  | -1.31831 | 1.62E-05 | 7.98E-05 |
| PAX2     | 10.54625 | 3.431807  | -1.61969 | 1.38E-06 | 8.98E-06 |
| BANK1    | 0.687127 | 1.08571   | 0.65999  | 1.04E-06 | 6.96E-06 |
| PCDHB10  | 1.863964 | 1.13128   | -0.72042 | 0.000888 | 0.002666 |
| TMPRSS6  | 1.456289 | 0.958507  | -0.60344 | 0.010292 | 0.022038 |
| HMGA2    | 5.92819  | 1.781458  | -1.73453 | 1.00E-08 | 1.02E-07 |
| DPYSL5   | 1.602619 | 0.105986  | -3.91849 | 8.69E-12 | 1.34E-10 |
| MSI1     | 14.97468 | 6.611998  | -1.17937 | 6.07E-12 | 9.56E-11 |
| IGSF21   | 0.540303 | 1.439892  | 1.414122 | 2.07E-26 | 7.37E-25 |
| GABRP    | 2.255442 | 4.041438  | 0.841458 | 2.57E-06 | 1.56E-05 |
| FDCSP    | 0.243257 | 1.632287  | 2.74634  | 7.70E-14 | 1.46E-12 |
| ATP4B    | 0.229149 | 0.048703  | -2.23421 | 2.05E-11 | 2.99E-10 |
| FPR2     | 0.08538  | 0.274171  | 1.683111 | 3.76E-22 | 1.09E-20 |
| SLC16A12 | 0.301338 | 0.049466  | -2.60687 | 5.06E-08 | 4.49E-07 |
| EMX2     | 66.48357 | 38.31044  | -0.79526 | 1.73E-10 | 2.29E-09 |
| COL24A1  | 0.172576 | 0.302614  | 0.810251 | 0.001236 | 0.00354  |
| P2RX1    | 0.174174 | 0.357603  | 1.037829 | 7.51E-10 | 9.26E-09 |
| CXXC4    | 0.607054 | 0.285936  | -1.08613 | 0.005574 | 0.013031 |
| OTULINL  | 2.265441 | 3.775593  | 0.736911 | 5.90E-16 | 1.28E-14 |
| TRAF3IP3 | 0.146432 | 0.497233  | 1.763692 | 1.33E-45 | 2.62E-43 |
| CYP17A1  | 2.119979 | 0.925484  | -1.19577 | 0.000915 | 0.002734 |
| ITGB2    | 5.2799   | 17.08722  | 1.694335 | 2.69E-45 | 4.82E-43 |
| TOX      | 3.890422 | 2.048659  | -0.92525 | 0.002727 | 0.00706  |
| CTSW     | 1.26498  | 5.2636    | 2.056936 | 1.79E-40 | 1.62E-38 |

| Gene     | conMean  | treatMean | logFC    | pValue   | FDR      |
|----------|----------|-----------|----------|----------|----------|
| SAMD5    | 0.49113  | 0.248124  | -0.98505 | 0.000161 | 0.000605 |
| CA8      | 3.846653 | 2.309445  | -0.73606 | 4.06E-05 | 0.000179 |
| CD96     | 0.324218 | 1.129664  | 1.800856 | 4.19E-42 | 4.54E-40 |
| PDCD1LG2 | 0.491489 | 1.848783  | 1.911345 | 2.45E-42 | 2.80E-40 |
| MT3      | 1.197085 | 0.770999  | -0.63473 | 0.020004 | 0.038689 |
| GPR34    | 1.994524 | 5.696313  | 1.513984 | 4.20E-32 | 2.08E-30 |
| CLCN4    | 1.797418 | 1.140514  | -0.65624 | 5.86E-07 | 4.17E-06 |
| ADCY1    | 0.459315 | 0.283048  | -0.69844 | 1.60E-06 | 1.02E-05 |
| CLEC3B   | 0.845594 | 1.600919  | 0.920863 | 0.001139 | 0.003295 |
| ST8SIA6  | 0.238358 | 0.45842   | 0.943541 | 2.08E-05 | 9.92E-05 |
| CEL      | 10.87696 | 1.593821  | -2.77071 | 0.000208 | 0.000753 |
| SLC22A17 | 6.833736 | 4.562155  | -0.58296 | 0.000164 | 0.000615 |
| SELL     | 1.410472 | 3.884734  | 1.461638 | 5.20E-31 | 2.44E-29 |
| ZNF285   | 0.987021 | 0.643521  | -0.61709 | 3.07E-07 | 2.33E-06 |
| LHFPL3   | 0.24529  | 0.080135  | -1.61399 | 0.000209 | 0.000759 |
| GALNT5   | 0.330913 | 0.650172  | 0.974368 | 3.23E-07 | 2.44E-06 |
| EFEMP1   | 6.44557  | 11.01022  | 0.772463 | 2.88E-07 | 2.20E-06 |
| ITGA4    | 0.474    | 1.102576  | 1.217919 | 1.71E-24 | 5.54E-23 |
| NPL      | 1.376976 | 2.948199  | 1.098331 | 1.22E-35 | 7.83E-34 |
| SLC49A3  | 2.039119 | 3.18274   | 0.642323 | 1.19E-11 | 1.79E-10 |
| CLMP     | 1.486517 | 2.496119  | 0.747751 | 3.87E-08 | 3.52E-07 |
| CROCC2   | 0.423392 | 0.21772   | -0.95952 | 4.86E-09 | 5.32E-08 |
| RGS1     | 6.71441  | 19.87665  | 1.565742 | 6.16E-29 | 2.52E-27 |
| ZNF730   | 0.732001 | 0.420197  | -0.80078 | 3.70E-09 | 4.13E-08 |
| NR5A1    | 3.306138 | 1.518047  | -1.12293 | 2.11E-06 | 1.31E-05 |
| NR0B1    | 0.517852 | 0.250745  | -1.04632 | 0.021968 | 0.041836 |
| ANKRD22  | 0.725066 | 2.450937  | 1.75715  | 3.25E-38 | 2.46E-36 |
| CD209    | 0.777697 | 1.485456  | 0.933625 | 7.13E-13 | 1.23E-11 |
| ADGRE2   | 0.232969 | 0.682162  | 1.549977 | 7.63E-32 | 3.74E-30 |
| CLEC18C  | 0.23051  | 0.118921  | -0.95483 | 0.000238 | 0.000849 |
| DLX2     | 0.764605 | 0.166049  | -2.20311 | 0.006124 | 0.014116 |
| SLAMF7   | 0.763755 | 3.223171  | 2.077298 | 1.49E-35 | 9.51E-34 |
| MSC      | 2.03952  | 3.865141  | 0.922292 | 1.25E-15 | 2.65E-14 |
| DPY19L2  | 0.546581 | 0.29363   | -0.89644 | 2.67E-06 | 1.61E-05 |
| ZNF286A  | 1.245638 | 0.820202  | -0.60283 | 9.17E-14 | 1.72E-12 |
| TMEM89   | 0.150109 | 0.085493  | -0.81214 | 5.77E-06 | 3.21E-05 |
| SPARC    | 205.7082 | 335.6258  | 0.706254 | 2.28E-06 | 1.40E-05 |
| TAP1     | 16.44725 | 35.3552   | 1.104076 | 1.39E-23 | 4.30E-22 |
| SOD2     | 7.744653 | 16.00334  | 1.047101 | 1.25E-22 | 3.70E-21 |
| CSF1     | 15.78145 | 31.39227  | 0.99218  | 5.86E-19 | 1.44E-17 |
| CD200R1  | 0.394806 | 0.686487  | 0.798088 | 1.04E-17 | 2.46E-16 |
| CYTL1    | 5.125967 | 1.820089  | -1.49382 | 0.000391 | 0.00131  |
| MAP6     | 2.030295 | 1.166684  | -0.79928 | 0.000436 | 0.001439 |
| TBX4     | 0.206853 | 0.086772  | -1.25331 | 1.36E-05 | 6.82E-05 |
| TBX2     | 11.66552 | 6.398726  | -0.86639 | 1.62E-05 | 8.00E-05 |

| Gene    | conMean  | treatMean | logFC    | pValue   | FDR      |
|---------|----------|-----------|----------|----------|----------|
| TMEM221 | 4.548723 | 2.159695  | -1.07463 | 1.63E-09 | 1.92E-08 |
| CAPS    | 26.75147 | 16.94495  | -0.65876 | 0.008107 | 0.017969 |
| LCP2    | 1.358989 | 4.47015   | 1.717789 | 1.05E-54 | 3.71E-51 |
| MORN5   | 3.693431 | 1.081293  | -1.7722  | 7.25E-10 | 8.95E-09 |
| FPR3    | 3.165884 | 11.05601  | 1.80415  | 2.16E-40 | 1.92E-38 |
| COL26A1 | 7.587029 | 3.703627  | -1.0346  | 0.001601 | 0.004432 |
| CD180   | 0.487201 | 1.414678  | 1.537886 | 4.33E-41 | 4.20E-39 |
| C1orf87 | 0.351903 | 0.151264  | -1.2181  | 0.008192 | 0.018138 |
| TUBB2B  | 12.6     | 1.661661  | -2.92273 | 1.55E-09 | 1.83E-08 |
| TMEFF1  | 0.944602 | 0.489661  | -0.94792 | 5.00E-09 | 5.46E-08 |
| CALY    | 0.434956 | 0.111872  | -1.95902 | 5.24E-06 | 2.95E-05 |
| C5orf46 | 0.444236 | 1.331887  | 1.584075 | 1.78E-11 | 2.62E-10 |
| SULT1C4 | 2.27275  | 0.962514  | -1.23956 | 2.21E-09 | 2.55E-08 |
| ITGA5   | 6.056127 | 10.37018  | 0.775974 | 2.35E-13 | 4.26E-12 |
| WDR38   | 5.140418 | 2.065174  | -1.31562 | 0.004755 | 0.011378 |
| TRPM5   | 0.781158 | 0.461583  | -0.75902 | 1.67E-06 | 1.06E-05 |
| BPIFB1  | 0.544819 | 0.325505  | -0.7431  | 0.000522 | 0.001679 |
| GREM1   | 0.559068 | 0.879922  | 0.654352 | 5.33E-10 | 6.71E-09 |
| DNAAF4  | 0.939058 | 0.620224  | -0.59843 | 1.18E-08 | 1.19E-07 |
| HPN     | 28.82032 | 15.12826  | -0.92984 | 0.001001 | 0.00296  |
| SMIM24  | 6.072789 | 2.20165   | -1.46377 | 2.98E-05 | 0.000137 |
| IMPG2   | 3.994636 | 1.386544  | -1.52657 | 3.42E-06 | 2.01E-05 |
| DAPP1   | 1.296645 | 2.388026  | 0.881036 | 7.36E-19 | 1.80E-17 |
| MPEG1   | 2.496268 | 7.658024  | 1.617199 | 1.55E-37 | 1.10E-35 |
| PIK3R5  | 0.497988 | 1.269358  | 1.349915 | 3.74E-33 | 1.99E-31 |
| IL15RA  | 2.405255 | 5.380965  | 1.161675 | 1.08E-28 | 4.38E-27 |
| ESRRB   | 0.253704 | 0.093005  | -1.44777 | 0.002483 | 0.006497 |
| MT1H    | 12.83878 | 27.34278  | 1.090652 | 7.15E-05 | 0.000295 |
| FAM181A | 6.149256 | 4.076887  | -0.59294 | 6.77E-05 | 0.000281 |
| PLEKHD1 | 0.19724  | 0.107674  | -0.87328 | 5.15E-06 | 2.90E-05 |
| PCDHGB1 | 0.920667 | 0.402463  | -1.19382 | 0.000387 | 0.001297 |
| GIMAP7  | 1.622771 | 4.651622  | 1.519274 | 2.33E-41 | 2.34E-39 |
| DSCAML1 | 1.198    | 0.71797   | -0.73863 | 0.008107 | 0.017969 |
| ACKR2   | 1.662732 | 3.09093   | 0.894485 | 1.40E-07 | 1.15E-06 |
| APOBEC2 | 0.410936 | 0.234308  | -0.81051 | 0.000167 | 0.000624 |
| NETO1   | 0.075897 | 0.166282  | 1.131521 | 5.31E-08 | 4.70E-07 |
| FAM81B  | 1.959036 | 0.92131   | -1.08839 | 0.000276 | 0.000967 |
| SH2D1B  | 0.075338 | 0.21519   | 1.514157 | 4.40E-25 | 1.48E-23 |
| KLF2    | 9.087485 | 14.63894  | 0.687858 | 1.85E-11 | 2.72E-10 |
| OSCAR   | 1.531918 | 3.801093  | 1.311075 | 1.06E-38 | 8.21E-37 |
| PCK1    | 3.348274 | 5.19584   | 0.633939 | 0.00228  | 0.006027 |
| LHFPL1  | 0.324579 | 0.17912   | -0.85765 | 1.30E-07 | 1.07E-06 |
| VNN2    | 0.46842  | 1.307767  | 1.481233 | 1.35E-28 | 5.41E-27 |
| COL1A2  | 139.0364 | 235.7702  | 0.761919 | 1.49E-06 | 9.60E-06 |
| SLC5A12 | 0.356969 | 0.186638  | -0.93556 | 1.60E-07 | 1.30E-06 |
| DNAH6   | 0.411036 | 0.179204  | -1.19766 | 1.62E-12 | 2.70E-11 |

| Gene       | conMean  | treatMean | logFC    | pValue   | FDR      |
|------------|----------|-----------|----------|----------|----------|
| GABRR1     | 0.566294 | 0.214025  | -1.40377 | 2.90E-05 | 0.000133 |
| EPB41L3    | 0.636191 | 1.448994  | 1.18752  | 3.11E-32 | 1.55E-30 |
| EGF        | 0.090098 | 0.182147  | 1.015546 | 0.007234 | 0.016305 |
| FOXJ1      | 46.24073 | 28.19151  | -0.7139  | 0.000394 | 0.001318 |
| RASGRP3    | 0.419453 | 0.660784  | 0.655669 | 8.63E-19 | 2.11E-17 |
| ARMC3      | 1.69138  | 0.898994  | -0.91182 | 1.06E-05 | 5.48E-05 |
| TREM2      | 7.673645 | 20.49394  | 1.417213 | 2.89E-31 | 1.38E-29 |
| KCNJ13     | 0.367326 | 0.138134  | -1.411   | 5.91E-06 | 3.27E-05 |
| TAP2       | 4.323512 | 7.383876  | 0.772175 | 1.12E-16 | 2.52E-15 |
| ZIC2       | 4.271161 | 2.499281  | -0.77311 | 0.020694 | 0.03979  |
| CCL11      | 1.697003 | 5.276292  | 1.636535 | 6.65E-22 | 1.89E-20 |
| CNTN3      | 1.256234 | 0.714266  | -0.81457 | 3.59E-05 | 0.000161 |
| SIGLEC14   | 0.697136 | 2.451787  | 1.814322 | 9.41E-33 | 4.82E-31 |
| NPIP15     | 2.238972 | 1.148194  | -0.96347 | 0.000218 | 0.000784 |
| CD14       | 25.7339  | 71.90335  | 1.482389 | 2.71E-42 | 3.05E-40 |
| TNFAIP8    | 1.396186 | 2.25991   | 0.694774 | 2.99E-15 | 6.20E-14 |
| FBN2       | 2.322239 | 0.985196  | -1.23703 | 0.004564 | 0.010991 |
| ECRG4      | 9.709834 | 3.924632  | -1.30689 | 2.31E-07 | 1.81E-06 |
| TMEM158    | 7.525961 | 12.02214  | 0.675746 | 8.94E-08 | 7.61E-07 |
| DKK4       | 4.602531 | 0.108533  | -5.40622 | 0.025964 | 0.048203 |
| RUFY4      | 0.420638 | 0.82299   | 0.968295 | 4.05E-07 | 2.99E-06 |
| ZCCHC12    | 2.189587 | 0.606997  | -1.8509  | 8.67E-08 | 7.40E-07 |
| UNC79      | 0.355664 | 0.211587  | -0.74926 | 0.0047   | 0.011267 |
| WDR66      | 0.54889  | 0.313862  | -0.80639 | 0.000965 | 0.002863 |
| AC010325.1 | 0.402968 | 0.255159  | -0.65927 | 0.002644 | 0.006874 |
| GFI1       | 0.154404 | 0.4441    | 1.524177 | 3.34E-33 | 1.78E-31 |
| LRRIQ1     | 0.981871 | 0.477236  | -1.04083 | 7.17E-09 | 7.60E-08 |
| PCDHA6     | 0.336945 | 0.220307  | -0.613   | 0.003857 | 0.009495 |
| GCGR       | 0.178779 | 0.046262  | -1.95027 | 3.21E-07 | 2.43E-06 |
| CCDC151    | 2.972618 | 1.315817  | -1.17578 | 5.44E-11 | 7.63E-10 |
| SLC44A5    | 1.412473 | 0.784529  | -0.84832 | 5.23E-05 | 0.000224 |
| GPBAR1     | 0.412102 | 0.625263  | 0.601462 | 2.27E-19 | 5.69E-18 |
| AATK       | 1.610977 | 0.896233  | -0.84599 | 0.014792 | 0.030053 |
| GPR18      | 0.152543 | 0.425069  | 1.478482 | 1.40E-34 | 8.49E-33 |
| OR7G2      | 0.052054 | 0.355871  | 2.773273 | 0.007501 | 0.0168   |
| GNLY       | 0.988818 | 4.385549  | 2.14898  | 8.99E-29 | 3.64E-27 |
| TBXAS1     | 0.89673  | 2.074717  | 1.21017  | 2.07E-34 | 1.23E-32 |
| LRRC7      | 0.126575 | 0.073441  | -0.78533 | 0.01147  | 0.02421  |
| ARHGAP30   | 2.179778 | 4.643826  | 1.091132 | 2.69E-32 | 1.35E-30 |
| APLP1      | 16.10029 | 9.036113  | -0.83331 | 5.17E-05 | 0.000222 |
| LILRB2     | 0.717724 | 2.329556  | 1.698553 | 1.24E-45 | 2.48E-43 |
| CARD16     | 3.360503 | 5.747539  | 0.774267 | 2.10E-20 | 5.56E-19 |
| ECM1       | 5.835438 | 11.00171  | 0.914814 | 1.66E-12 | 2.76E-11 |
| MPO        | 0.154208 | 0.097241  | -0.66524 | 0.00559  | 0.01306  |
| APOBEC3D   | 1.756763 | 2.916656  | 0.731396 | 1.03E-13 | 1.93E-12 |

| Gene     | conMean  | treatMean | logFC    | pValue   | FDR      |
|----------|----------|-----------|----------|----------|----------|
| KCNE4    | 0.981513 | 1.624576  | 0.726984 | 4.98E-09 | 5.45E-08 |
| LRP2BP   | 0.617231 | 0.405986  | -0.60438 | 0.000876 | 0.002634 |
| EVI2B    | 2.965639 | 10.5126   | 1.825705 | 4.71E-51 | 3.66E-48 |
| CRTAM    | 0.190358 | 0.535195  | 1.491349 | 5.19E-33 | 2.72E-31 |
| LCN2     | 152.8127 | 312.6142  | 1.032619 | 2.86E-08 | 2.67E-07 |
| CRLF1    | 3.136423 | 0.8087    | -1.95544 | 2.35E-07 | 1.83E-06 |
| RSAD2    | 6.319434 | 9.765263  | 0.627863 | 9.51E-09 | 9.76E-08 |
| STOML3   | 0.442093 | 0.206286  | -1.0997  | 3.36E-06 | 1.98E-05 |
| EYA4     | 2.239723 | 1.079203  | -1.05335 | 4.71E-06 | 2.67E-05 |
| CCNB1IP1 | 22.08391 | 14.24674  | -0.63236 | 6.03E-09 | 6.48E-08 |
| DPYD     | 1.15929  | 2.773291  | 1.258357 | 1.13E-31 | 5.53E-30 |
| CNMD     | 0.455577 | 0.056701  | -3.00625 | 2.47E-05 | 0.000115 |
| CD36     | 0.670604 | 1.294021  | 0.948328 | 1.66E-07 | 1.34E-06 |
| GIMAP2   | 1.731343 | 3.572371  | 1.044991 | 2.97E-30 | 1.32E-28 |
| VSIG4    | 7.502651 | 22.25988  | 1.568974 | 2.67E-33 | 1.44E-31 |
| JAK2     | 1.165468 | 1.818419  | 0.641775 | 5.73E-17 | 1.31E-15 |
| IGF2     | 499.1142 | 306.0784  | -0.70547 | 0.004551 | 0.010968 |
| PLEKHF1  | 10.79394 | 16.56107  | 0.617574 | 1.08E-05 | 5.59E-05 |
| GABBR1   | 3.596635 | 2.383144  | -0.59378 | 0.003302 | 0.008315 |
| CSPG5    | 3.139305 | 2.051803  | -0.61355 | 0.000421 | 0.001395 |
| SPAG17   | 0.678267 | 0.438746  | -0.62847 | 0.000779 | 0.002382 |
| TAGAP    | 0.612713 | 2.024077  | 1.72398  | 4.97E-47 | 1.41E-44 |
| C3orf80  | 0.716286 | 1.338887  | 0.902428 | 6.82E-15 | 1.38E-13 |
| TFF3     | 19.37541 | 5.497983  | -1.81725 | 0.001463 | 0.004095 |
| RTP4     | 12.52086 | 19.99129  | 0.675038 | 4.22E-10 | 5.37E-09 |
| EXOC3L4  | 0.439858 | 0.709078  | 0.688906 | 9.93E-07 | 6.71E-06 |
| NNMT     | 19.05742 | 42.06915  | 1.14241  | 1.45E-18 | 3.53E-17 |
| LCP1     | 11.98115 | 22.37889  | 0.901371 | 4.68E-24 | 1.49E-22 |
| GNG2     | 0.918112 | 1.58926   | 0.791612 | 5.14E-27 | 1.92E-25 |
| CPED1    | 0.66033  | 0.988251  | 0.581691 | 7.36E-14 | 1.40E-12 |
| GPR37L1  | 0.786459 | 0.489316  | -0.6846  | 0.00537  | 0.012617 |
| ZNF443   | 3.261855 | 2.170413  | -0.58772 | 0.000435 | 0.001435 |
| FCAR     | 0.090424 | 0.279281  | 1.626931 | 4.79E-20 | 1.23E-18 |
| TSPAN7   | 12.57886 | 8.265182  | -0.60588 | 3.18E-06 | 1.89E-05 |
| NKAIN4   | 3.741489 | 0.817336  | -2.19461 | 2.91E-09 | 3.30E-08 |
| SPINK1   | 12.42822 | 0.270934  | -5.51954 | 0.002359 | 0.006208 |
| PRRX1    | 2.743212 | 4.313499  | 0.652993 | 5.20E-10 | 6.56E-09 |
| TMPRSS9  | 0.481968 | 0.215222  | -1.16311 | 0.001779 | 0.004855 |
| NWD1     | 0.759308 | 0.311557  | -1.28519 | 0.000116 | 0.000451 |
| RGS22    | 0.515573 | 0.247151  | -1.06078 | 3.48E-05 | 0.000157 |
| CD84     | 0.646445 | 2.169294  | 1.746626 | 1.45E-42 | 1.70E-40 |
| PAQR6    | 2.513132 | 1.587091  | -0.6631  | 0.001018 | 0.003002 |
| C6orf118 | 1.013996 | 0.424477  | -1.25629 | 2.45E-09 | 2.82E-08 |
| PTH2R    | 4.488319 | 2.701813  | -0.73225 | 1.67E-06 | 1.06E-05 |
| P2RY12   | 0.154766 | 0.456483  | 1.560475 | 2.05E-21 | 5.65E-20 |
| LSP1     | 4.693619 | 11.69524  | 1.317148 | 9.84E-42 | 1.03E-39 |

| Gene      | conMean  | treatMean | logFC    | pValue   | FDR      |
|-----------|----------|-----------|----------|----------|----------|
| TGFB1     | 15.69954 | 25.83417  | 0.718559 | 1.29E-20 | 3.43E-19 |
| CD8A      | 0.804653 | 3.388725  | 2.074303 | 5.31E-37 | 3.66E-35 |
| GRM6      | 0.176009 | 0.103003  | -0.77296 | 4.54E-08 | 4.07E-07 |
| DOCK10    | 0.465464 | 1.045172  | 1.167    | 1.03E-33 | 5.79E-32 |
| BIN2      | 0.743907 | 2.460104  | 1.725525 | 3.92E-51 | 3.27E-48 |
| NR0B2     | 0.361644 | 0.045954  | -2.9763  | 4.58E-06 | 2.60E-05 |
| RASSF4    | 1.841681 | 3.2456    | 0.817462 | 6.78E-23 | 2.03E-21 |
| PIH1D2    | 1.501036 | 0.935697  | -0.68184 | 3.02E-07 | 2.30E-06 |
| ITGAM     | 0.964525 | 2.885584  | 1.580973 | 1.26E-37 | 9.06E-36 |
| ATP7B     | 3.631143 | 2.422697  | -0.58381 | 4.66E-05 | 0.000202 |
| MMP20     | 0.071764 | 0.129169  | 0.847936 | 0.007357 | 0.016539 |
| HAND1     | 0.163663 | 0.348212  | 1.08924  | 0.003343 | 0.0084   |
| IL22RA2   | 0.056898 | 0.151561  | 1.413437 | 1.54E-14 | 3.07E-13 |
| C2CD6     | 0.333788 | 0.20892   | -0.67598 | 0.00013  | 0.000498 |
| ITGAL     | 0.769218 | 2.921306  | 1.92515  | 4.88E-45 | 8.13E-43 |
| LCK       | 0.845995 | 2.209862  | 1.385234 | 1.58E-32 | 8.00E-31 |
| CCL24     | 0.225967 | 0.628287  | 1.475312 | 1.68E-11 | 2.49E-10 |
| SLFN12L   | 0.088486 | 0.228868  | 1.370997 | 7.29E-29 | 2.96E-27 |
| STAT4     | 0.237136 | 0.502639  | 1.08381  | 1.28E-37 | 9.13E-36 |
| DCDC2B    | 0.604233 | 0.403538  | -0.5824  | 9.39E-05 | 0.000375 |
| SCN3B     | 0.594805 | 0.378317  | -0.65282 | 0.016518 | 0.03295  |
| TTYH1     | 5.416259 | 2.489429  | -1.12148 | 0.000247 | 0.000875 |
| PITPNC1   | 4.593978 | 3.034542  | -0.59827 | 1.35E-05 | 6.78E-05 |
| GMFG      | 2.775053 | 7.174143  | 1.370291 | 4.06E-47 | 1.20E-44 |
| IL7       | 0.269283 | 0.500155  | 0.893254 | 5.18E-22 | 1.48E-20 |
| GCK       | 1.258672 | 0.512694  | -1.29573 | 2.28E-08 | 2.18E-07 |
| TTLL2     | 0.167375 | 0.077897  | -1.10345 | 5.92E-06 | 3.28E-05 |
| WDFY4     | 0.237073 | 0.716034  | 1.594696 | 4.34E-33 | 2.28E-31 |
| ATP6V0D2  | 0.109363 | 0.187004  | 0.773944 | 0.000215 | 0.000777 |
| ICOS      | 0.12344  | 0.631123  | 2.354114 | 5.70E-40 | 4.84E-38 |
| B2M       | 319.9477 | 673.3362  | 1.073491 | 2.35E-34 | 1.39E-32 |
| ATP6V1FNB | 1.001679 | 0.621611  | -0.68834 | 3.93E-07 | 2.91E-06 |
| DAW1      | 0.828463 | 0.258176  | -1.68208 | 0.000152 | 0.000574 |
| SIGLEC8   | 0.213844 | 0.796325  | 1.896801 | 3.20E-27 | 1.21E-25 |
| RAPGEFL1  | 2.965738 | 1.964541  | -0.5942  | 3.09E-05 | 0.000141 |
| LY6H      | 2.686195 | 0.586717  | -2.19483 | 0.004058 | 0.009914 |
| INHBA     | 2.243886 | 5.204011  | 1.213625 | 1.17E-10 | 1.57E-09 |
| TMEM178A  | 4.364554 | 2.339173  | -0.89984 | 6.35E-08 | 5.57E-07 |
| C7orf61   | 1.052439 | 0.642826  | -0.71124 | 0.002238 | 0.005931 |
| CYP1B1    | 3.501737 | 6.177184  | 0.818879 | 3.98E-08 | 3.60E-07 |
| ARHGEF6   | 0.959532 | 2.033422  | 1.083507 | 2.82E-31 | 1.35E-29 |
| ANKRD53   | 1.14201  | 0.651799  | -0.80908 | 1.47E-06 | 9.52E-06 |
| FAXC      | 0.384393 | 0.206589  | -0.89582 | 3.09E-05 | 0.000141 |
| RCS1      | 0.582065 | 1.514584  | 1.379669 | 4.83E-37 | 3.34E-35 |
| SLC7A3    | 1.35963  | 0.581726  | -1.2248  | 0.00054  | 0.001732 |

| Gene     | conMean  | treatMean | logFC    | pValue   | FDR      |
|----------|----------|-----------|----------|----------|----------|
| IL16     | 0.452248 | 1.06892   | 1.240967 | 1.35E-31 | 6.53E-30 |
| ALX4     | 0.353704 | 0.137601  | -1.36205 | 0.004689 | 0.011247 |
| HIF3A    | 5.530299 | 3.315234  | -0.73825 | 0.000233 | 0.000831 |
| DNAH2    | 0.660038 | 0.407011  | -0.69748 | 1.00E-07 | 8.46E-07 |
| LAMA1    | 1.358738 | 0.619032  | -1.13418 | 2.73E-06 | 1.64E-05 |
| SIGLEC9  | 0.680734 | 2.019204  | 1.568623 | 2.61E-43 | 3.45E-41 |
| SOX6     | 0.880907 | 0.476521  | -0.88645 | 2.70E-08 | 2.54E-07 |
| VAMP5    | 10.42143 | 22.06401  | 1.082141 | 2.55E-33 | 1.38E-31 |
| MAP7D2   | 1.821274 | 1.066083  | -0.77263 | 0.000364 | 0.00123  |
| GAPT     | 0.454634 | 1.317193  | 1.534689 | 4.85E-26 | 1.69E-24 |
| COL9A3   | 4.703674 | 0.979341  | -2.2639  | 9.40E-11 | 1.28E-09 |
| WDR17    | 0.205013 | 0.113574  | -0.85208 | 0.000394 | 0.001318 |
| TMEM198  | 2.938995 | 1.373762  | -1.09719 | 5.89E-10 | 7.36E-09 |
| BEX5     | 5.386479 | 3.192778  | -0.75453 | 0.001473 | 0.004115 |
| MT1M     | 3.512709 | 7.271085  | 1.049587 | 9.78E-10 | 1.18E-08 |
| LGALS9   | 13.91321 | 21.6759   | 0.639637 | 4.76E-16 | 1.03E-14 |
| FBXO2    | 15.06363 | 9.047366  | -0.7355  | 3.04E-05 | 0.000139 |
| ATP2B3   | 0.222813 | 0.117316  | -0.92543 | 9.45E-09 | 9.71E-08 |
| GPR17    | 0.732773 | 0.31122   | -1.23543 | 7.17E-07 | 5.03E-06 |
| MAN1A1   | 4.065609 | 8.529588  | 1.069005 | 3.84E-20 | 9.94E-19 |
| C17orf50 | 0.296691 | 0.153539  | -0.95035 | 2.87E-10 | 3.72E-09 |
| FAM183A  | 9.314171 | 3.561137  | -1.38709 | 6.11E-05 | 0.000257 |
| PCSK1N   | 47.8831  | 22.38596  | -1.09692 | 0.000396 | 0.001326 |
| MZB1     | 1.539285 | 5.847403  | 1.925535 | 2.12E-19 | 5.33E-18 |
| MRLN     | 0.151612 | 0.066652  | -1.18567 | 0.000583 | 0.001852 |
| UMODL1   | 0.300506 | 0.106352  | -1.49855 | 0.001661 | 0.004572 |
| HTR7     | 0.062442 | 0.169071  | 1.43705  | 5.47E-25 | 1.83E-23 |
| PLPPR1   | 0.213373 | 0.079678  | -1.42112 | 4.59E-07 | 3.34E-06 |
| COLGALT2 | 0.46285  | 0.23312   | -0.98947 | 0.008018 | 0.017791 |
| PIEZO1   | 4.433271 | 6.722725  | 0.600675 | 8.86E-07 | 6.06E-06 |
| COX6B2   | 0.284706 | 0.185253  | -0.61998 | 0.026592 | 0.049176 |
| ZNF732   | 0.893353 | 0.586058  | -0.60819 | 8.69E-05 | 0.000351 |
| CD3G     | 0.250587 | 0.974761  | 1.959738 | 3.16E-41 | 3.15E-39 |
| GPX2     | 0.468502 | 0.188213  | -1.31569 | 0.001487 | 0.00415  |
| LGALS12  | 0.098461 | 0.240868  | 1.290615 | 5.49E-17 | 1.26E-15 |
| FGFRL1   | 68.61344 | 44.02942  | -0.64002 | 2.49E-06 | 1.52E-05 |
| VSTM2B   | 1.432759 | 0.550247  | -1.38064 | 2.89E-11 | 4.18E-10 |
| RXFP4    | 0.287248 | 0.176197  | -0.70511 | 9.91E-05 | 0.000393 |
| C20orf96 | 19.59944 | 12.84068  | -0.61009 | 7.99E-12 | 1.24E-10 |
| CYP2C8   | 0.454134 | 0.254668  | -0.8345  | 1.45E-05 | 7.28E-05 |
| ENTPD2   | 10.05878 | 6.19906   | -0.69833 | 0.000511 | 0.001649 |
| MMP11    | 24.36499 | 46.61125  | 0.935869 | 1.50E-06 | 9.66E-06 |
| LPAR6    | 2.57344  | 4.606319  | 0.839916 | 6.18E-21 | 1.67E-19 |
| EFCAB12  | 0.830543 | 0.406578  | -1.03052 | 1.18E-08 | 1.19E-07 |
| ACSL5    | 7.946194 | 12.16986  | 0.614976 | 2.42E-11 | 3.53E-10 |
| ELL2     | 1.204576 | 2.327146  | 0.950037 | 1.57E-22 | 4.63E-21 |

| Gene               | conMean  | treatMean | logFC    | pValue   | FDR      |
|--------------------|----------|-----------|----------|----------|----------|
| C2orf50            | 1.302122 | 0.709914  | -0.87515 | 0.004118 | 0.010034 |
| ITIH2              | 1.578296 | 0.180852  | -3.12548 | 3.66E-06 | 2.14E-05 |
| AMHR2              | 0.656424 | 0.299427  | -1.13242 | 1.37E-06 | 8.93E-06 |
| CCDC27             | 0.282839 | 0.169199  | -0.74126 | 2.90E-08 | 2.70E-07 |
| GLI2               | 2.332248 | 1.538991  | -0.59974 | 3.69E-05 | 0.000165 |
| DNAAF1             | 0.74243  | 0.370671  | -1.00212 | 0.000867 | 0.002612 |
| APOE               | 116.1115 | 228.0668  | 0.973945 | 2.01E-23 | 6.16E-22 |
| HBEGF              | 3.039455 | 5.271825  | 0.79449  | 1.50E-10 | 2.00E-09 |
| SERPINB4           | 0.091205 | 0.264429  | 1.535694 | 0.017668 | 0.034881 |
| POU2F3             | 3.008788 | 4.854865  | 0.690249 | 9.64E-06 | 5.04E-05 |
| SPATA4             | 0.192141 | 0.093408  | -1.04054 | 9.98E-05 | 0.000395 |
| TLR7               | 0.490007 | 1.574848  | 1.684337 | 3.18E-37 | 2.23E-35 |
| LRRC38             | 0.172236 | 0.09409   | -0.87227 | 0.021522 | 0.041137 |
| FPR1               | 1.182879 | 4.004763  | 1.759415 | 2.89E-34 | 1.69E-32 |
| PCDHB6             | 1.766297 | 0.70348   | -1.32815 | 4.19E-07 | 3.07E-06 |
| PIGR               | 5.068102 | 10.57636  | 1.061326 | 9.66E-08 | 8.17E-07 |
| CD300A             | 1.519012 | 4.05291   | 1.415825 | 9.60E-42 | 1.01E-39 |
| ZFP42              | 1.315304 | 0.647017  | -1.02352 | 0.012284 | 0.025684 |
| BLOC1S5-<br>TXNDC5 | 0.163024 | 0.102348  | -0.6716  | 0.001664 | 0.004577 |
| LEFTY1             | 1.781789 | 0.372784  | -2.25691 | 5.53E-06 | 3.09E-05 |
| GJB7               | 0.434338 | 0.214348  | -1.01886 | 2.06E-05 | 9.85E-05 |
| KIF1A              | 13.20721 | 7.082728  | -0.89895 | 3.30E-08 | 3.04E-07 |
| ZNF84              | 3.295015 | 2.168536  | -0.60356 | 2.95E-11 | 4.26E-10 |
| ZNF229             | 2.175954 | 1.360867  | -0.67712 | 9.14E-05 | 0.000366 |
| TCERG1L            | 0.220289 | 0.061721  | -1.83557 | 2.45E-06 | 1.49E-05 |
| ZNF334             | 2.211599 | 1.349107  | -0.71309 | 1.15E-08 | 1.16E-07 |
| FXYD1              | 2.87535  | 1.059731  | -1.44004 | 3.70E-09 | 4.13E-08 |
| COX6A2             | 0.736881 | 0.421769  | -0.80498 | 0.000113 | 0.000441 |
| ITGA11             | 2.180706 | 4.748424  | 1.122654 | 1.97E-11 | 2.89E-10 |
| S1PR4              | 0.450366 | 1.447652  | 1.684544 | 1.15E-44 | 1.81E-42 |
| CEACAM4            | 0.053695 | 0.209358  | 1.963115 | 1.21E-31 | 5.85E-30 |
| AC018630.2         | 0.149932 | 0.100237  | -0.58089 | 5.90E-05 | 0.000249 |
| CSF3R              | 1.546139 | 4.042845  | 1.3867   | 2.13E-27 | 8.09E-26 |
| PKIA               | 1.914755 | 1.042844  | -0.87664 | 0.002217 | 0.005883 |
| ZNF709             | 0.320432 | 0.193817  | -0.72532 | 1.13E-07 | 9.44E-07 |
| TMEM150B           | 0.425977 | 1.222563  | 1.521061 | 3.25E-37 | 2.27E-35 |
| GNG3               | 0.744632 | 0.38495   | -0.95186 | 4.25E-07 | 3.11E-06 |
| EMILIN3            | 1.020856 | 0.260909  | -1.96816 | 2.07E-07 | 1.64E-06 |
| IL1RN              | 4.406616 | 7.513215  | 0.769759 | 6.22E-13 | 1.08E-11 |
| HLA-DQB1           | 17.83326 | 48.01605  | 1.428946 | 1.58E-26 | 5.68E-25 |
| GPR135             | 0.791917 | 0.474717  | -0.73828 | 1.42E-08 | 1.40E-07 |
| PLA2G4F            | 0.27809  | 0.145299  | -0.93653 | 5.02E-05 | 0.000216 |
| KCP                | 1.407652 | 0.667375  | -1.07672 | 4.00E-08 | 3.62E-07 |
| MEI1               | 0.313324 | 0.572679  | 0.870072 | 8.16E-22 | 2.30E-20 |



| Gene      | conMean  | treatMean | logFC    | pValue   | FDR      |
|-----------|----------|-----------|----------|----------|----------|
| ARHGAP15  | 0.200611 | 0.601756  | 1.58478  | 4.51E-50 | 2.36E-47 |
| SPACA3    | 0.13979  | 0.062029  | -1.17224 | 0.000738 | 0.002271 |
| CD300E    | 0.233285 | 0.659917  | 1.500189 | 1.56E-22 | 4.60E-21 |
| S100A2    | 17.0465  | 27.26087  | 0.677356 | 0.01053  | 0.022483 |
| MPP1      | 2.114561 | 3.750685  | 0.826796 | 1.64E-30 | 7.42E-29 |
| SPEF1     | 4.057649 | 2.104304  | -0.9473  | 2.61E-07 | 2.01E-06 |
| CPNE6     | 0.193584 | 0.053107  | -1.86599 | 0.002254 | 0.005969 |
| IRAK3     | 0.446642 | 0.79793   | 0.837144 | 2.78E-13 | 4.97E-12 |
| PIK3CG    | 0.276878 | 0.814641  | 1.556916 | 1.94E-33 | 1.07E-31 |
| EPSTI1    | 4.421985 | 8.292955  | 0.907192 | 3.66E-19 | 9.09E-18 |
| GZMA      | 1.488547 | 6.584629  | 2.145198 | 1.98E-45 | 3.69E-43 |
| SLC19A3   | 1.01881  | 1.852299  | 0.862431 | 5.53E-07 | 3.96E-06 |
| GPR162    | 3.445648 | 2.278255  | -0.59685 | 0.000551 | 0.001764 |
| DAB2      | 4.393872 | 7.195457  | 0.711594 | 6.22E-19 | 1.53E-17 |
| PLAU      | 13.19132 | 31.22352  | 1.243044 | 4.08E-20 | 1.05E-18 |
| TRPM2     | 2.221079 | 3.600611  | 0.696981 | 1.55E-15 | 3.27E-14 |
| GPR50     | 0.211473 | 0.116444  | -0.86084 | 8.78E-05 | 0.000354 |
| GZMM      | 0.298653 | 1.168268  | 1.967831 | 2.92E-44 | 4.40E-42 |
| TMEM190   | 3.747497 | 1.454133  | -1.36577 | 9.36E-08 | 7.96E-07 |
| IL18BP    | 2.494965 | 4.665357  | 0.902968 | 9.86E-27 | 3.59E-25 |
| SFTPB     | 0.493671 | 0.776434  | 0.653313 | 0.000249 | 0.000883 |
| LRRC15    | 2.131778 | 4.626276  | 1.117794 | 1.86E-09 | 2.18E-08 |
| THBS4     | 3.462392 | 1.795161  | -0.94766 | 1.64E-05 | 8.08E-05 |
| MAPK4     | 0.257126 | 0.095804  | -1.42431 | 7.04E-08 | 6.14E-07 |
| FYB2      | 0.959826 | 0.500858  | -0.93837 | 0.012192 | 0.025519 |
| KCNIP1    | 1.763025 | 0.724236  | -1.28352 | 1.49E-05 | 7.42E-05 |
| HS3ST2    | 0.327687 | 0.549124  | 0.744812 | 0.003507 | 0.008751 |
| HRH2      | 0.399128 | 0.684557  | 0.778318 | 5.26E-12 | 8.34E-11 |
| UROC1     | 0.152089 | 0.088283  | -0.7847  | 0.012838 | 0.026704 |
| IL21R     | 0.152858 | 0.812758  | 2.410631 | 1.35E-44 | 2.10E-42 |
| MYOC      | 1.234654 | 0.202233  | -2.61002 | 0.003682 | 0.009124 |
| DIRC1     | 0.043542 | 0.165333  | 1.924903 | 2.79E-10 | 3.62E-09 |
| COL16A1   | 3.288954 | 5.019485  | 0.60991  | 4.01E-07 | 2.96E-06 |
| HLA-DPB1  | 42.93522 | 121.3246  | 1.498638 | 5.08E-39 | 4.05E-37 |
| APOBEC3H  | 0.381366 | 0.954832  | 1.32407  | 8.80E-33 | 4.54E-31 |
| TNFAIP8L2 | 1.586251 | 4.893287  | 1.625183 | 6.24E-51 | 4.21E-48 |
| GJA8      | 0.54428  | 0.312412  | -0.8009  | 0.014909 | 0.03023  |
| SLCO6A1   | 0.135846 | 0.070908  | -0.93795 | 2.25E-05 | 0.000106 |
| TMC8      | 1.371722 | 3.061207  | 1.158113 | 5.31E-34 | 3.01E-32 |
| NANOS3    | 1.650652 | 1.093967  | -0.59347 | 5.70E-06 | 3.17E-05 |
| SLAMF1    | 0.095368 | 0.42234   | 2.146825 | 6.28E-43 | 7.80E-41 |
| WSCD2     | 0.566273 | 0.195142  | -1.53697 | 0.023937 | 0.044983 |
| PIK3R6    | 0.393646 | 0.708724  | 0.848327 | 6.43E-25 | 2.14E-23 |
| CD300C    | 0.53143  | 1.66538   | 1.647898 | 3.55E-42 | 3.96E-40 |
| PLPPR3    | 0.997695 | 0.481779  | -1.05023 | 0.019414 | 0.03778  |
| HLA-DMA   | 31.19355 | 67.76423  | 1.119276 | 7.82E-27 | 2.86E-25 |

| Gene     | conMean  | treatMean | logFC    | pValue   | FDR      |
|----------|----------|-----------|----------|----------|----------|
| SMPDL3A  | 1.384374 | 2.431805  | 0.812794 | 1.18E-22 | 3.51E-21 |
| CERS1    | 0.495387 | 0.293285  | -0.75626 | 4.45E-11 | 6.30E-10 |
| CD28     | 0.234303 | 0.432996  | 0.885978 | 1.32E-16 | 2.96E-15 |
| SMIM17   | 0.319494 | 0.207688  | -0.62137 | 0.001035 | 0.003045 |
| EVI2A    | 1.642562 | 4.974829  | 1.598699 | 9.94E-45 | 1.60E-42 |
| LILRA2   | 0.194734 | 0.527004  | 1.436307 | 2.02E-30 | 9.08E-29 |
| TREML1   | 0.19513  | 0.410285  | 1.072193 | 4.27E-16 | 9.35E-15 |
| COL6A2   | 74.65886 | 113.8706  | 0.60901  | 5.88E-06 | 3.26E-05 |
| MLXIPL   | 6.698269 | 3.46654   | -0.95029 | 4.38E-07 | 3.19E-06 |
| PLXNC1   | 1.369012 | 2.293795  | 0.744601 | 2.18E-21 | 6.00E-20 |
| PSMB9    | 12.98289 | 29.90935  | 1.203986 | 6.28E-24 | 1.98E-22 |
| SERPINF1 | 21.72716 | 38.97876  | 0.843188 | 2.33E-15 | 4.88E-14 |
| VNN1     | 1.18896  | 1.964314  | 0.724325 | 4.74E-17 | 1.09E-15 |
| PLCB1    | 1.791609 | 1.162368  | -0.62419 | 1.31E-07 | 1.08E-06 |
| C11orf97 | 1.061483 | 0.31343   | -1.75986 | 0.001251 | 0.003578 |
| ZNF723   | 0.179692 | 0.114901  | -0.64513 | 0.001139 | 0.003296 |
| USH1G    | 0.316801 | 0.184054  | -0.78345 | 0.008391 | 0.018501 |
| CX3CR1   | 2.208005 | 4.781927  | 1.114848 | 8.42E-12 | 1.30E-10 |
| DISP3    | 0.631887 | 0.116875  | -2.43471 | 1.99E-13 | 3.65E-12 |
| GBX1     | 0.170967 | 0.086005  | -0.99122 | 3.69E-05 | 0.000165 |
| ETV7     | 2.160683 | 4.474514  | 1.050244 | 5.08E-19 | 1.26E-17 |
| CAMK2N2  | 2.7355   | 1.642014  | -0.73634 | 0.009711 | 0.020965 |
| CDHR2    | 0.175243 | 0.112546  | -0.63884 | 0.003025 | 0.007709 |
| CCL7     | 0.654502 | 1.773396  | 1.438046 | 2.09E-12 | 3.43E-11 |
| CXCL17   | 42.96809 | 77.63137  | 0.853374 | 6.48E-07 | 4.58E-06 |
| AOAH     | 1.108362 | 3.007294  | 1.440037 | 1.92E-39 | 1.60E-37 |
| ACSM5    | 0.102517 | 0.158044  | 0.624466 | 7.52E-11 | 1.04E-09 |
| MLKL     | 0.73335  | 1.477064  | 1.010158 | 4.62E-31 | 2.17E-29 |
| MRVI1    | 1.275424 | 2.3114    | 0.857789 | 4.26E-12 | 6.82E-11 |
| SLC6A11  | 1.032054 | 0.631363  | -0.70898 | 0.002176 | 0.005785 |
| TIGIT    | 0.128152 | 0.519911  | 2.02041  | 1.95E-39 | 1.61E-37 |
| PFN3     | 0.243039 | 0.124027  | -0.97054 | 0.008268 | 0.01827  |
| MAFB     | 15.05119 | 22.59864  | 0.586359 | 4.95E-12 | 7.91E-11 |
| IFI30    | 0.448586 | 0.918402  | 1.033743 | 7.72E-28 | 3.00E-26 |
| HYDIN    | 0.322751 | 0.157423  | -1.03577 | 9.61E-11 | 1.31E-09 |
| IGSF1    | 0.815366 | 0.463002  | -0.81643 | 0.000122 | 0.000472 |
| BATF     | 1.558997 | 3.417429  | 1.132294 | 1.16E-29 | 4.99E-28 |
| CD4      | 7.665064 | 19.79099  | 1.368474 | 1.28E-43 | 1.76E-41 |
| APBB1IP  | 1.460185 | 4.860831  | 1.735051 | 6.88E-47 | 1.87E-44 |
| RNF213   | 7.344764 | 11.61809  | 0.661585 | 7.44E-12 | 1.16E-10 |
| HLA-DQA2 | 7.343987 | 23.50991  | 1.678634 | 1.04E-16 | 2.36E-15 |
| ADRB1    | 0.172834 | 0.308848  | 0.83751  | 8.35E-09 | 8.74E-08 |
| TSPAN8   | 2.74012  | 1.658193  | -0.72463 | 3.92E-06 | 2.27E-05 |
| SLC35F1  | 0.343551 | 0.142503  | -1.26953 | 0.001113 | 0.003233 |
| IFIT2    | 8.006765 | 12.09502  | 0.595122 | 1.84E-08 | 1.79E-07 |

| Gene     | conMean  | treatMean | logFC    | pValue   | FDR      |
|----------|----------|-----------|----------|----------|----------|
| SFRP2    | 27.69741 | 59.30107  | 1.098307 | 5.13E-07 | 3.69E-06 |
| COL6A6   | 0.281908 | 0.43955   | 0.6408   | 8.15E-08 | 6.99E-07 |
| TEX14    | 0.171036 | 0.105861  | -0.69213 | 0.00072  | 0.002223 |
| CCN4     | 1.546727 | 3.271406  | 1.080693 | 4.51E-13 | 7.91E-12 |
| LRRC18   | 0.206894 | 0.09803   | -1.0776  | 0.001952 | 0.005258 |
| FLNC     | 4.620406 | 2.793497  | -0.72595 | 0.013792 | 0.028337 |
| SLC46A2  | 0.142832 | 0.219046  | 0.616918 | 5.45E-10 | 6.85E-09 |
| SOBP     | 1.840426 | 1.064662  | -0.78964 | 2.96E-05 | 0.000136 |
| CARD6    | 1.717942 | 2.902543  | 0.756636 | 9.51E-15 | 1.91E-13 |
| CDHR3    | 1.056634 | 0.365971  | -1.52968 | 3.54E-08 | 3.24E-07 |
| PTPRT    | 0.950419 | 0.330823  | -1.5225  | 7.27E-08 | 6.32E-07 |
| UNC5A    | 5.537409 | 9.680852  | 0.805923 | 4.72E-05 | 0.000204 |
| BNC1     | 0.583866 | 1.310156  | 1.166029 | 6.21E-06 | 3.42E-05 |
| PIK3CD   | 2.926888 | 4.471412  | 0.611363 | 4.55E-12 | 7.27E-11 |
| TMEM229B | 0.626829 | 1.127126  | 0.846506 | 2.38E-18 | 5.77E-17 |
| RAB7B    | 1.240774 | 2.234098  | 0.848452 | 5.88E-15 | 1.20E-13 |
| CNGA4    | 0.406678 | 0.188469  | -1.10956 | 0.000595 | 0.001885 |
| CHGB     | 1.308117 | 0.146454  | -3.15897 | 0.006897 | 0.015638 |
| SOHLH2   | 0.159057 | 0.094875  | -0.74543 | 0.000607 | 0.00192  |
| CFAP300  | 3.103357 | 1.904067  | -0.70475 | 2.00E-05 | 9.57E-05 |
| SIGLEC10 | 0.806142 | 2.73027   | 1.759938 | 4.55E-41 | 4.39E-39 |
| F13A1    | 4.640529 | 8.438679  | 0.862728 | 1.59E-11 | 2.37E-10 |
| KCNJ12   | 1.741825 | 1.012892  | -0.78212 | 8.09E-07 | 5.61E-06 |
| LGR5     | 14.64064 | 5.194224  | -1.495   | 1.08E-10 | 1.46E-09 |
| CCL23    | 0.088301 | 0.276263  | 1.645546 | 2.32E-23 | 7.07E-22 |
| SERPINE1 | 13.6753  | 32.45592  | 1.246909 | 2.94E-08 | 2.73E-07 |
| TPPP3    | 18.18788 | 9.236045  | -0.97763 | 9.56E-09 | 9.79E-08 |
| RHBDL3   | 0.353782 | 0.150346  | -1.23457 | 0.012953 | 0.026886 |
| IKZF3    | 0.478026 | 1.033029  | 1.11172  | 2.49E-22 | 7.27E-21 |
| CD244    | 0.069359 | 0.287223  | 2.050018 | 2.57E-43 | 3.44E-41 |
| ASXL3    | 0.211421 | 0.072753  | -1.53903 | 1.34E-06 | 8.76E-06 |
| SH2D1A   | 0.156811 | 0.675442  | 2.106803 | 1.37E-41 | 1.39E-39 |
| TUBB4A   | 8.846317 | 4.738672  | -0.90059 | 3.48E-05 | 0.000157 |
| PARVG    | 1.296086 | 2.030121  | 0.647404 | 2.35E-15 | 4.91E-14 |
| IRF8     | 0.989213 | 2.567885  | 1.376227 | 3.88E-35 | 2.40E-33 |
| C5AR1    | 3.646301 | 8.05188   | 1.142892 | 6.28E-24 | 1.98E-22 |
| SAMD11   | 6.929574 | 3.349801  | -1.04869 | 1.96E-05 | 9.43E-05 |
| C2CD4B   | 3.279262 | 5.789843  | 0.820153 | 0.000199 | 0.000726 |
| FOXI3    | 2.731226 | 1.706055  | -0.67888 | 0.026752 | 0.049407 |
| FNDC1    | 3.799424 | 8.000925  | 1.074386 | 4.74E-08 | 4.24E-07 |
| NTF3     | 2.806419 | 1.728921  | -0.69886 | 0.002471 | 0.006473 |
| ABLIM3   | 0.392009 | 0.608232  | 0.633736 | 2.02E-09 | 2.35E-08 |
| FSTL5    | 0.150177 | 0.087132  | -0.78539 | 0.003054 | 0.007774 |
| PAPPA2   | 0.43927  | 0.034059  | -3.68902 | 0.002533 | 0.006614 |
| SPN      | 0.406049 | 1.0117    | 1.317055 | 1.46E-41 | 1.48E-39 |
| ZNF469   | 1.38461  | 2.473722  | 0.837203 | 4.80E-07 | 3.47E-06 |

| Gene     | conMean  | treatMean | logFC    | pValue   | FDR      |
|----------|----------|-----------|----------|----------|----------|
| DRC7     | 0.703658 | 0.358761  | -0.97185 | 5.15E-05 | 0.000221 |
| IL10     | 0.773218 | 1.471695  | 0.928531 | 1.16E-15 | 2.48E-14 |
| PTCH2    | 1.261127 | 0.735302  | -0.77831 | 2.26E-06 | 1.39E-05 |
| CDK5R2   | 0.464243 | 0.195885  | -1.24487 | 0.018003 | 0.035433 |
| ISM1     | 3.071503 | 4.778409  | 0.637586 | 2.29E-05 | 0.000108 |
| CFAP46   | 0.489628 | 0.267553  | -0.87186 | 1.72E-05 | 8.43E-05 |
| DIO2     | 0.454124 | 0.888132  | 0.967688 | 6.52E-09 | 6.96E-08 |
| OR2T8    | 0.260102 | 0.110809  | -1.23101 | 0.004988 | 0.011856 |
| CSTA     | 2.769034 | 4.888989  | 0.820153 | 7.23E-13 | 1.24E-11 |
| ADAMTS12 | 1.483253 | 2.549831  | 0.781637 | 1.12E-05 | 5.73E-05 |
| XCL2     | 0.598932 | 2.659799  | 2.150853 | 4.28E-40 | 3.72E-38 |
| LRGUK    | 0.643409 | 0.421496  | -0.61022 | 5.43E-06 | 3.04E-05 |
| PTCRA    | 0.062307 | 0.175282  | 1.4922   | 2.25E-25 | 7.76E-24 |
| MAATS1   | 1.686282 | 0.99515   | -0.76086 | 3.93E-09 | 4.38E-08 |
| OLFML2B  | 7.591406 | 11.70109  | 0.624204 | 3.28E-13 | 5.82E-12 |
| TRIM22   | 5.828108 | 11.65409  | 0.999737 | 1.43E-23 | 4.41E-22 |
| MYO1G    | 0.531531 | 1.247155  | 1.230415 | 2.24E-36 | 1.53E-34 |
| ADAM8    | 4.462303 | 9.165149  | 1.03837  | 3.56E-22 | 1.03E-20 |
| MMP7     | 74.71379 | 120.7807  | 0.692944 | 0.001228 | 0.003522 |
| ZDHHC11B | 0.771894 | 0.438011  | -0.81744 | 1.00E-10 | 1.36E-09 |
| ZNF208   | 0.894056 | 0.44549   | -1.00497 | 9.15E-06 | 4.82E-05 |
| RBM20    | 0.197575 | 0.127157  | -0.63579 | 8.83E-05 | 0.000355 |
| CLEC4E   | 0.386161 | 1.688235  | 2.12824  | 2.46E-39 | 2.01E-37 |
| SALL1    | 1.851026 | 0.472356  | -1.97038 | 0.000435 | 0.001435 |
| CFAP206  | 0.220377 | 0.141458  | -0.63959 | 0.002855 | 0.007344 |
| ZCCHC18  | 0.304425 | 0.168327  | -0.85482 | 5.55E-07 | 3.98E-06 |
| ZKSCAN7  | 1.652597 | 1.094552  | -0.59439 | 6.60E-11 | 9.19E-10 |
| ARNT2    | 6.217314 | 3.700542  | -0.74855 | 1.64E-08 | 1.61E-07 |
| KIAA1549 | 2.33583  | 1.246078  | -0.90654 | 6.14E-13 | 1.06E-11 |
| ADAM11   | 0.630205 | 0.380813  | -0.72674 | 3.24E-06 | 1.92E-05 |
| HLA-DRB1 | 182.9028 | 458.2115  | 1.324937 | 1.21E-31 | 5.87E-30 |
| CTHRC1   | 25.48923 | 46.9318   | 0.880678 | 1.33E-08 | 1.32E-07 |
| MEX3B    | 1.45957  | 0.850006  | -0.78    | 0.000597 | 0.001891 |
| GAB3     | 0.295233 | 0.768029  | 1.37931  | 3.19E-39 | 2.59E-37 |
| KCNAB2   | 2.15122  | 3.424982  | 0.670942 | 2.36E-20 | 6.22E-19 |
| PTPRC    | 1.024871 | 3.971295  | 1.954167 | 6.84E-54 | 1.61E-50 |
| SIGLEC7  | 0.585734 | 1.628619  | 1.475332 | 3.88E-35 | 2.40E-33 |
| SULF1    | 9.234977 | 22.9895   | 1.315795 | 5.15E-15 | 1.05E-13 |
| KLHL41   | 0.355639 | 0.134008  | -1.40809 | 1.43E-08 | 1.42E-07 |
| MEFV     | 0.079125 | 0.166086  | 1.069729 | 3.94E-24 | 1.26E-22 |
| ARMC4    | 0.641451 | 0.296387  | -1.11386 | 8.80E-09 | 9.17E-08 |
| TNFRSF1B | 4.791608 | 10.65009  | 1.152284 | 2.11E-30 | 9.45E-29 |
| CD40LG   | 0.103284 | 0.438454  | 2.085813 | 8.91E-35 | 5.47E-33 |
| PDGFRA   | 2.104513 | 3.147616  | 0.580773 | 1.69E-05 | 8.31E-05 |
| ANTXR2   | 1.161513 | 1.839129  | 0.663017 | 4.82E-11 | 6.82E-10 |

| Gene     | conMean  | treatMean | logFC    | pValue   | FDR      |
|----------|----------|-----------|----------|----------|----------|
| LYNX1    | 5.32431  | 8.929081  | 0.745917 | 0.006975 | 0.015784 |
| EREG     | 0.088818 | 0.176471  | 0.990505 | 1.99E-06 | 1.25E-05 |
| IGFL2    | 0.455664 | 1.910213  | 2.067692 | 6.32E-18 | 1.51E-16 |
| ZNF738   | 8.080041 | 4.853339  | -0.73538 | 5.42E-10 | 6.82E-09 |
| ANO2     | 0.878363 | 0.474561  | -0.88822 | 4.47E-08 | 4.02E-07 |
| PRLH     | 0.459676 | 0.178826  | -1.36207 | 0.013895 | 0.028522 |
| MGAT5B   | 1.142317 | 0.481279  | -1.24702 | 2.18E-05 | 0.000103 |
| LRCOL1   | 0.344672 | 0.180949  | -0.92964 | 0.000268 | 0.000944 |
| ZNF781   | 0.272188 | 0.172162  | -0.66084 | 0.009711 | 0.020965 |
| ZBTB16   | 0.363209 | 0.642503  | 0.822904 | 2.61E-07 | 2.01E-06 |
| NKX6-1   | 3.426209 | 1.107222  | -1.62967 | 1.02E-05 | 5.31E-05 |
| DNMT3A   | 7.273665 | 4.784516  | -0.60431 | 5.51E-09 | 5.96E-08 |
| UBXN10   | 4.772642 | 3.158235  | -0.59567 | 0.00087  | 0.00262  |
| IFI35    | 13.43451 | 23.23118  | 0.790118 | 6.51E-17 | 1.49E-15 |
| SLIT1    | 0.372579 | 0.087753  | -2.08603 | 0.000146 | 0.000554 |
| GIMAP4   | 3.910678 | 11.02292  | 1.495016 | 1.79E-48 | 6.86E-46 |
| CLEC5A   | 0.981894 | 2.642719  | 1.428384 | 1.02E-27 | 3.90E-26 |
| CCL5     | 6.963152 | 32.07291  | 2.203543 | 6.85E-48 | 2.31E-45 |
| ATP10A   | 1.23659  | 1.856396  | 0.586138 | 9.93E-09 | 1.01E-07 |
| CLEC4M   | 0.265051 | 0.101055  | -1.39113 | 0.000366 | 0.001237 |
| GRAP2    | 0.074542 | 0.27682   | 1.892823 | 4.01E-41 | 3.95E-39 |
| IQCN     | 4.336352 | 2.657537  | -0.70639 | 2.16E-06 | 1.34E-05 |
| CHI3L2   | 0.887055 | 2.018714  | 1.186341 | 7.85E-15 | 1.58E-13 |
| PAPSS2   | 2.368631 | 3.98969   | 0.752223 | 2.50E-12 | 4.07E-11 |
| STK33    | 1.29193  | 0.764268  | -0.75738 | 9.40E-12 | 1.44E-10 |
| CABCOC01 | 1.522353 | 0.56914   | -1.41945 | 5.70E-09 | 6.15E-08 |
| ICAM3    | 0.129591 | 0.448721  | 1.791855 | 2.09E-39 | 1.73E-37 |
| ZC3H12D  | 0.137202 | 0.316885  | 1.207651 | 5.20E-30 | 2.28E-28 |
| MMP25    | 0.409823 | 0.646223  | 0.657032 | 1.93E-10 | 2.54E-09 |
| DGKK     | 0.345153 | 0.166586  | -1.05097 | 0.006019 | 0.013922 |
| NGEF     | 5.252223 | 3.40201   | -0.62654 | 0.001077 | 0.003145 |
| CYP4F22  | 0.034966 | 0.248386  | 2.828547 | 1.12E-26 | 4.04E-25 |
| CXCL14   | 12.34666 | 19.24505  | 0.640367 | 1.39E-06 | 9.05E-06 |
| CHRND    | 0.279671 | 0.057985  | -2.26997 | 5.03E-11 | 7.09E-10 |
| CHRNA    | 0.346254 | 0.096638  | -1.84116 | 1.03E-05 | 5.36E-05 |
| IFT81    | 2.771738 | 1.719924  | -0.68845 | 2.82E-14 | 5.52E-13 |
| MS4A7    | 1.972777 | 5.150601  | 1.384513 | 1.17E-35 | 7.51E-34 |
| CFAP221  | 0.426932 | 0.194454  | -1.13458 | 2.76E-07 | 2.11E-06 |
| GLIPR1   | 1.442132 | 3.046852  | 1.079116 | 6.36E-33 | 3.31E-31 |
| FXYD4    | 3.166774 | 1.864185  | -0.76447 | 4.13E-05 | 0.000182 |
| GPNMB    | 14.95005 | 30.41151  | 1.024467 | 1.00E-21 | 2.82E-20 |
| TOX2     | 2.905902 | 1.896344  | -0.61577 | 0.002456 | 0.006437 |
| SLCO1B3  | 0.128888 | 0.27652   | 1.10127  | 0.013584 | 0.027988 |
| FBP2     | 0.143057 | 0.079089  | -0.85503 | 0.001484 | 0.004146 |
| ARHGAP31 | 1.1228   | 2.017225  | 0.845271 | 1.95E-18 | 4.74E-17 |
| TNFAIP6  | 1.944008 | 3.746982  | 0.946695 | 3.50E-15 | 7.22E-14 |

| Gene       | conMean  | treatMean | logFC    | pValue   | FDR      |
|------------|----------|-----------|----------|----------|----------|
| GNGT2      | 0.459305 | 0.985089  | 1.100802 | 7.65E-34 | 4.32E-32 |
| RBPJL      | 2.326806 | 0.15599   | -3.89882 | 4.60E-05 | 0.0002   |
| TOX3       | 0.912494 | 0.201012  | -2.18253 | 6.16E-06 | 3.40E-05 |
| PTF1A      | 1.283284 | 0.106002  | -3.59768 | 0.0002   | 0.00073  |
| TNFRSF4    | 1.768859 | 3.303072  | 0.900989 | 4.53E-21 | 1.23E-19 |
| KIF5C      | 2.546394 | 1.700709  | -0.58232 | 3.10E-06 | 1.84E-05 |
| HLA-DRB5   | 53.94572 | 137.4763  | 1.349602 | 1.14E-19 | 2.89E-18 |
| CFAP52     | 0.717225 | 0.36184   | -0.98707 | 8.24E-06 | 4.40E-05 |
| ZSCAN23    | 0.272815 | 0.18047   | -0.59617 | 5.34E-05 | 0.000228 |
| LYN        | 5.877813 | 9.516139  | 0.695097 | 3.94E-22 | 1.14E-20 |
| GFPT2      | 1.53821  | 2.627329  | 0.772344 | 2.45E-08 | 2.33E-07 |
| SGK2       | 0.821678 | 0.462769  | -0.82828 | 3.51E-05 | 0.000158 |
| VGLL3      | 0.375551 | 0.83381   | 1.15071  | 3.28E-10 | 4.23E-09 |
| WNK2       | 4.390131 | 2.265023  | -0.95474 | 1.59E-12 | 2.66E-11 |
| SLC5A5     | 0.45214  | 0.690029  | 0.609887 | 0.011319 | 0.023947 |
| STK10      | 2.062999 | 3.351254  | 0.699958 | 2.59E-20 | 6.82E-19 |
| FAM241A    | 0.323076 | 0.581197  | 0.847152 | 3.17E-20 | 8.26E-19 |
| CALML5     | 5.797864 | 19.0672   | 1.7175   | 2.45E-06 | 1.50E-05 |
| GLRA2      | 0.260623 | 0.150865  | -0.78871 | 0.000216 | 0.000778 |
| PLCH1      | 1.062302 | 0.547541  | -0.95616 | 9.65E-07 | 6.54E-06 |
| VAV1       | 1.825827 | 3.524929  | 0.949044 | 3.25E-25 | 1.11E-23 |
| NOTUM      | 18.3608  | 2.270911  | -3.01529 | 0.007274 | 0.016375 |
| LTB        | 5.228298 | 13.26674  | 1.3434   | 5.24E-24 | 1.67E-22 |
| USP44      | 0.53874  | 0.303637  | -0.82724 | 7.86E-05 | 0.00032  |
| RXRG       | 3.453229 | 1.009868  | -1.77378 | 4.62E-07 | 3.35E-06 |
| SBK2       | 1.963521 | 0.789617  | -1.31422 | 0.001227 | 0.003522 |
| BHLHE22    | 0.102968 | 0.299046  | 1.538177 | 2.77E-20 | 7.28E-19 |
| FGFR3      | 6.160079 | 2.814401  | -1.13012 | 1.20E-05 | 6.11E-05 |
| IL12RB1    | 0.318999 | 1.055399  | 1.726167 | 8.23E-46 | 1.74E-43 |
| RCOR2      | 11.82706 | 4.294972  | -1.46137 | 7.20E-16 | 1.56E-14 |
| C11orf96   | 6.189591 | 9.479366  | 0.614946 | 0.000316 | 0.001088 |
| PIM2       | 10.30983 | 16.27496  | 0.658633 | 3.01E-11 | 4.33E-10 |
| OLFM2      | 16.08627 | 8.9164    | -0.8513  | 0.000624 | 0.001962 |
| TTC29      | 0.304718 | 0.115586  | -1.39851 | 0.001293 | 0.003683 |
| LRRTM4     | 0.255777 | 0.141947  | -0.84954 | 0.000272 | 0.000956 |
| KREMEN2    | 5.854187 | 3.656978  | -0.67882 | 8.26E-05 | 0.000335 |
| RIN3       | 3.056166 | 4.598266  | 0.589367 | 1.45E-15 | 3.06E-14 |
| GJC2       | 3.772878 | 1.859396  | -1.02083 | 8.88E-06 | 4.69E-05 |
| AC013470.2 | 0.214528 | 0.12981   | -0.72476 | 3.68E-05 | 0.000164 |
| RASL11A    | 6.088576 | 9.431237  | 0.631342 | 7.49E-06 | 4.05E-05 |
| RNASE2     | 0.974485 | 3.080499  | 1.660453 | 2.01E-32 | 1.02E-30 |
| FCGR3A     | 7.738628 | 25.983    | 1.747418 | 3.49E-41 | 3.46E-39 |
| LY96       | 4.300129 | 11.66202  | 1.439365 | 1.09E-41 | 1.13E-39 |
| CXCL12     | 7.909977 | 13.86351  | 0.809547 | 2.25E-09 | 2.60E-08 |
| SAA1       | 18.20831 | 29.73771  | 0.707696 | 2.87E-11 | 4.16E-10 |

| Gene     | conMean  | treatMean | logFC    | pValue   | FDR      |
|----------|----------|-----------|----------|----------|----------|
| FGF8     | 0.239804 | 0.030582  | -2.97109 | 4.58E-07 | 3.33E-06 |
| ALOX5AP  | 7.121158 | 25.42028  | 1.835796 | 2.13E-40 | 1.91E-38 |
| VWA5B1   | 0.145181 | 0.064056  | -1.18045 | 7.87E-06 | 4.23E-05 |
| PCSK2    | 1.125122 | 0.580248  | -0.95534 | 0.000247 | 0.000875 |
| FANK1    | 1.731263 | 1.149766  | -0.59048 | 2.05E-06 | 1.28E-05 |
| NPIP6    | 0.213075 | 0.135164  | -0.65665 | 3.71E-06 | 2.16E-05 |
| SCG5     | 11.06614 | 5.614406  | -0.97895 | 1.75E-05 | 8.55E-05 |
| TAS2R31  | 0.210458 | 0.138804  | -0.60048 | 7.60E-05 | 0.000311 |
| ROR1     | 3.634994 | 2.318087  | -0.64902 | 5.69E-05 | 0.000241 |
| FGF17    | 5.024938 | 0.211707  | -4.56896 | 8.45E-17 | 1.92E-15 |
| LRRC73   | 2.523321 | 1.462025  | -0.78736 | 6.09E-06 | 3.36E-05 |
| PRSS3    | 0.741761 | 0.261635  | -1.5034  | 0.000985 | 0.002916 |
| ICA1L    | 0.963259 | 0.60001   | -0.68294 | 3.83E-12 | 6.15E-11 |
| P4HA3    | 0.412357 | 0.684338  | 0.730814 | 4.79E-08 | 4.28E-07 |
| SRSF12   | 1.282398 | 0.780005  | -0.71729 | 1.17E-06 | 7.74E-06 |
| C10orf82 | 1.079425 | 0.392287  | -1.46028 | 1.26E-08 | 1.26E-07 |
| PRSS56   | 0.202104 | 0.043173  | -2.2269  | 6.17E-10 | 7.68E-09 |
| DPEP2    | 0.285953 | 0.620251  | 1.117073 | 6.48E-28 | 2.54E-26 |
| EFS      | 7.388144 | 4.779816  | -0.62826 | 0.002502 | 0.006542 |
| MTMR7    | 0.52302  | 0.348575  | -0.5854  | 2.14E-07 | 1.69E-06 |
| DNAI2    | 0.466144 | 0.171137  | -1.44562 | 3.46E-07 | 2.59E-06 |
| SLC22A23 | 3.382242 | 2.196191  | -0.62298 | 0.000399 | 0.001334 |
| LRRC52   | 0.29357  | 0.108453  | -1.43664 | 1.11E-05 | 5.72E-05 |
| TTC21A   | 1.271322 | 0.822661  | -0.62796 | 1.98E-06 | 1.24E-05 |
| HAPLN2   | 0.259223 | 0.147799  | -0.81056 | 8.28E-06 | 4.42E-05 |
| SORCS1   | 0.686576 | 0.191878  | -1.83923 | 0.001014 | 0.002993 |
| CHRNA6   | 0.107448 | 0.239903  | 1.158818 | 7.85E-11 | 1.08E-09 |
| DUSP15   | 2.003493 | 0.978523  | -1.03384 | 5.95E-12 | 9.40E-11 |
| STUM     | 0.54064  | 0.257788  | -1.06848 | 6.17E-06 | 3.40E-05 |
| CD69     | 0.847784 | 2.545512  | 1.586187 | 5.18E-32 | 2.56E-30 |
| HLA-DRA  | 379.567  | 972.445   | 1.357262 | 2.44E-34 | 1.43E-32 |
| MMP2     | 39.04674 | 72.63186  | 0.8954   | 7.74E-08 | 6.67E-07 |
| PCLO     | 0.372051 | 0.216005  | -0.78443 | 4.73E-07 | 3.43E-06 |
| CCL8     | 2.103253 | 6.32162   | 1.587672 | 3.44E-24 | 1.11E-22 |
| LAX1     | 0.150451 | 0.532477  | 1.823424 | 3.88E-23 | 1.17E-21 |
| HMGCLL1  | 0.25193  | 0.118253  | -1.09114 | 0.002708 | 0.007017 |
| LGI4     | 0.582225 | 0.364377  | -0.67614 | 0.023882 | 0.044897 |
| FCGR2B   | 0.691333 | 2.50346   | 1.85647  | 4.57E-46 | 1.06E-43 |
| MATN1    | 0.257154 | 0.102563  | -1.32612 | 0.007005 | 0.015843 |
| TMC5     | 1.426761 | 2.210259  | 0.631472 | 0.006284 | 0.01442  |
| SELP     | 0.274279 | 0.635862  | 1.213073 | 1.37E-14 | 2.74E-13 |
| GPR150   | 0.075324 | 0.135369  | 0.845705 | 6.23E-12 | 9.79E-11 |
| LRRC25   | 1.988031 | 5.379183  | 1.436047 | 8.02E-43 | 9.71E-41 |
| C2       | 8.722981 | 13.87485  | 0.669579 | 1.04E-12 | 1.77E-11 |
| SLC26A7  | 1.39652  | 0.517817  | -1.43132 | 0.000131 | 0.000502 |
| CRISPLD2 | 3.025676 | 6.391022  | 1.078789 | 2.61E-07 | 2.01E-06 |

| Gene       | conMean  | treatMean | logFC    | pValue   | FDR      |
|------------|----------|-----------|----------|----------|----------|
| MMP12      | 1.233586 | 4.50656   | 1.869168 | 2.84E-09 | 3.22E-08 |
| CORIN      | 0.127525 | 0.228667  | 0.842467 | 2.32E-08 | 2.21E-07 |
| FFAR1      | 0.235955 | 0.121334  | -0.95953 | 0.001128 | 0.003267 |
| FER1L5     | 0.388501 | 0.253074  | -0.61836 | 7.01E-06 | 3.82E-05 |
| SBK1       | 14.33306 | 7.487428  | -0.9368  | 1.19E-10 | 1.60E-09 |
| SPRY2      | 13.83312 | 8.639748  | -0.67907 | 0.000618 | 0.001946 |
| GGT5       | 1.882601 | 3.304828  | 0.811848 | 2.06E-16 | 4.59E-15 |
| PGAP4      | 4.718304 | 2.981447  | -0.66226 | 8.21E-06 | 4.39E-05 |
| CD52       | 8.352482 | 26.84674  | 1.68447  | 6.41E-38 | 4.73E-36 |
| ACKR4      | 0.353052 | 0.624958  | 0.823879 | 2.18E-10 | 2.85E-09 |
| CD5        | 0.380962 | 1.401205  | 1.87895  | 3.79E-42 | 4.19E-40 |
| HLA-DQB2   | 2.800215 | 8.670692  | 1.630609 | 3.78E-26 | 1.33E-24 |
| GATA4      | 2.190734 | 1.445408  | -0.59994 | 0.00102  | 0.003007 |
| KCNK13     | 0.685986 | 1.032947  | 0.590515 | 5.77E-13 | 1.00E-11 |
| CCL2       | 15.07327 | 33.4705   | 1.150898 | 3.96E-29 | 1.64E-27 |
| GIMAP1     | 0.380129 | 0.945854  | 1.31513  | 6.34E-39 | 4.96E-37 |
| COL1A1     | 349.27   | 655.4572  | 0.908159 | 2.06E-07 | 1.63E-06 |
| POPDC3     | 1.007263 | 0.4386    | -1.19946 | 0.000741 | 0.00228  |
| KCNK3      | 1.377395 | 0.787649  | -0.80632 | 0.010306 | 0.022064 |
| CD226      | 0.063538 | 0.155749  | 1.293531 | 1.35E-33 | 7.54E-32 |
| DNAJC5B    | 0.090435 | 0.238881  | 1.401338 | 5.68E-23 | 1.71E-21 |
| SCGB1D4    | 3.023566 | 0.443836  | -2.76815 | 2.80E-05 | 0.000129 |
| PTGER2     | 2.713438 | 4.34896   | 0.680548 | 6.35E-11 | 8.88E-10 |
| CARD17     | 0.176461 | 0.421988  | 1.257854 | 5.02E-14 | 9.66E-13 |
| LTBP4      | 34.05228 | 15.80585  | -1.10729 | 4.24E-08 | 3.82E-07 |
| PIANP      | 3.311108 | 1.52255   | -1.12082 | 7.96E-09 | 8.37E-08 |
| GPSM3      | 9.112581 | 18.74832  | 1.04083  | 7.21E-31 | 3.35E-29 |
| AP006333.1 | 0.534457 | 0.151065  | -1.8229  | 7.82E-08 | 6.72E-07 |
| ZMYND15    | 1.931628 | 2.915922  | 0.594135 | 5.69E-10 | 7.12E-09 |
| KIRREL2    | 1.899265 | 0.576848  | -1.71918 | 9.00E-05 | 0.000361 |
| CPA1       | 2.674531 | 0.209301  | -3.67564 | 1.28E-06 | 8.44E-06 |
| SP5        | 6.674868 | 2.092069  | -1.67381 | 2.76E-08 | 2.59E-07 |
| THBS2      | 10.71588 | 27.526    | 1.361044 | 6.52E-14 | 1.24E-12 |
| BLNK       | 1.433724 | 2.150089  | 0.584629 | 6.11E-14 | 1.17E-12 |
| NLRC4      | 0.349739 | 0.650906  | 0.896169 | 1.13E-28 | 4.55E-27 |
| GPRIN3     | 0.309159 | 0.690481  | 1.159251 | 5.56E-36 | 3.63E-34 |
| PSD2       | 0.50536  | 0.310416  | -0.70311 | 0.000303 | 0.00105  |
| STAC3      | 1.157459 | 1.747988  | 0.594734 | 6.83E-16 | 1.48E-14 |
| EMX1       | 0.273093 | 0.075075  | -1.86299 | 0.003226 | 0.008146 |
| TMEM273    | 0.40699  | 0.96838   | 1.250579 | 4.47E-34 | 2.57E-32 |
| LILRA1     | 0.147276 | 0.389464  | 1.402966 | 3.92E-29 | 1.63E-27 |
| LMNTD1     | 0.143201 | 0.05719   | -1.32421 | 0.0073   | 0.016428 |
| SLC31A2    | 0.219545 | 0.441546  | 1.008051 | 3.60E-23 | 1.09E-21 |
| ZNF648     | 0.152144 | 0.088635  | -0.77949 | 2.65E-08 | 2.50E-07 |
| KIR2DL4    | 0.091063 | 0.413271  | 2.182153 | 9.30E-28 | 3.58E-26 |



| Gene      | conMean  | treatMean | logFC    | pValue   | FDR      |
|-----------|----------|-----------|----------|----------|----------|
| TMEM106A  | 1.598731 | 2.548906  | 0.672951 | 5.04E-19 | 1.25E-17 |
| ACP3      | 2.854034 | 5.973588  | 1.065595 | 1.47E-05 | 7.36E-05 |
| SNCB      | 0.769788 | 0.276827  | -1.47548 | 1.43E-05 | 7.17E-05 |
| RAB38     | 6.384533 | 3.743931  | -0.77003 | 1.17E-06 | 7.74E-06 |
| CTXN1     | 165.437  | 110.2715  | -0.58522 | 0.000277 | 0.000969 |
| CBY2      | 0.403422 | 0.249985  | -0.69045 | 2.71E-05 | 0.000125 |
| CCR7      | 0.37621  | 1.198443  | 1.67155  | 7.78E-33 | 4.02E-31 |
| PCP4      | 24.17012 | 11.64313  | -1.05375 | 7.85E-09 | 8.26E-08 |
| CD163     | 3.057507 | 9.26502   | 1.599438 | 2.07E-35 | 1.30E-33 |
| RASAL3    | 0.617284 | 1.943567  | 1.6547   | 2.37E-46 | 6.00E-44 |
| ACKR1     | 1.363489 | 2.590563  | 0.925962 | 1.80E-09 | 2.11E-08 |
| COL5A2    | 13.09151 | 24.48835  | 0.903464 | 2.60E-09 | 2.97E-08 |
| NRTN      | 8.03519  | 4.947394  | -0.69966 | 6.04E-05 | 0.000254 |
| PSTPIP2   | 1.972991 | 3.693371  | 0.904554 | 2.59E-16 | 5.73E-15 |
| NAP1L2    | 0.694212 | 0.450887  | -0.62261 | 0.00139  | 0.00391  |
| NPHP1     | 1.197079 | 0.788905  | -0.60159 | 3.85E-11 | 5.49E-10 |
| CATSPER1  | 0.184146 | 0.327699  | 0.831522 | 7.16E-30 | 3.12E-28 |
| STARD8    | 0.725796 | 1.130135  | 0.638858 | 7.80E-20 | 1.99E-18 |
| THBD      | 1.912667 | 3.770982  | 0.979355 | 1.58E-12 | 2.64E-11 |
| ODF3B     | 7.101246 | 10.91282  | 0.61988  | 6.62E-15 | 1.35E-13 |
| FCRLA     | 0.052939 | 0.182207  | 1.78318  | 4.50E-24 | 1.44E-22 |
| HNF1A     | 0.231743 | 0.015302  | -3.92073 | 7.00E-05 | 0.000289 |
| HOXD1     | 5.426097 | 8.187004  | 0.593421 | 0.001571 | 0.004354 |
| NR2F6     | 117.2769 | 77.77677  | -0.59251 | 1.46E-09 | 1.73E-08 |
| COL4A6    | 0.525557 | 0.247159  | -1.08841 | 4.44E-06 | 2.54E-05 |
| KRT6A     | 6.847011 | 11.97181  | 0.806096 | 7.32E-05 | 0.000301 |
| SLC25A18  | 0.344876 | 0.185185  | -0.89712 | 0.001025 | 0.003018 |
| ZNF703    | 33.6623  | 20.29998  | -0.72966 | 1.10E-05 | 5.65E-05 |
| PPEF1     | 0.127166 | 0.248684  | 0.967603 | 6.95E-07 | 4.88E-06 |
| CLLU1-AS1 | 0.048928 | 0.167572  | 1.776043 | 4.16E-05 | 0.000183 |
| GFRA3     | 3.154565 | 0.683646  | -2.20612 | 0.001431 | 0.004013 |
| HNF1B     | 1.087631 | 0.451918  | -1.26706 | 6.23E-07 | 4.41E-06 |
| PCDHGA1   | 0.333259 | 0.204236  | -0.70641 | 4.81E-05 | 0.000208 |
| CBLN4     | 0.131765 | 0.221588  | 0.749908 | 9.27E-09 | 9.56E-08 |
| LINGO3    | 0.152045 | 0.233783  | 0.620671 | 8.37E-13 | 1.43E-11 |
| MICAL1    | 2.070833 | 3.142216  | 0.601571 | 1.84E-13 | 3.39E-12 |
| LRP4      | 3.073211 | 0.93653   | -1.71435 | 3.60E-07 | 2.68E-06 |
| LTA       | 0.191733 | 0.706836  | 1.882279 | 6.32E-44 | 9.13E-42 |
| PCDHB2    | 4.09569  | 2.660036  | -0.62266 | 0.000542 | 0.001737 |
| CD1E      | 0.107876 | 0.876452  | 3.022305 | 4.06E-30 | 1.79E-28 |
| LRFN1     | 5.027346 | 3.241029  | -0.63334 | 9.64E-06 | 5.04E-05 |
| RNF224    | 1.156173 | 0.580571  | -0.99381 | 8.01E-06 | 4.30E-05 |
| LKAAEAR1  | 2.30046  | 0.825104  | -1.47927 | 1.02E-11 | 1.56E-10 |
| SCGB1D1   | 26.7109  | 5.211664  | -2.35761 | 0.014622 | 0.029802 |
| TMEM72    | 0.502192 | 0.070035  | -2.8421  | 4.55E-10 | 5.78E-09 |
| VWC2      | 0.190728 | 0.066169  | -1.52729 | 9.52E-07 | 6.46E-06 |

| Gene      | conMean  | treatMean | logFC    | pValue   | FDR      |
|-----------|----------|-----------|----------|----------|----------|
| LHFPL2    | 3.130922 | 5.949562  | 0.926196 | 8.90E-33 | 4.57E-31 |
| CCL4      | 2.623926 | 7.895822  | 1.589363 | 4.17E-41 | 4.07E-39 |
| KCNIP3    | 2.497694 | 1.48808   | -0.74714 | 9.09E-09 | 9.41E-08 |
| TNF       | 3.51355  | 6.558114  | 0.900351 | 3.55E-10 | 4.56E-09 |
| ANKRD33   | 0.267589 | 0.071805  | -1.89786 | 5.13E-05 | 0.00022  |
| SLC26A9   | 0.915453 | 1.480075  | 0.693112 | 7.53E-05 | 0.000308 |
| KRT31     | 0.210234 | 0.034727  | -2.59789 | 0.007135 | 0.016101 |
| CAVIN4    | 0.565149 | 0.333641  | -0.76033 | 6.52E-09 | 6.96E-08 |
| SPHK1     | 1.515187 | 3.0245    | 0.9972   | 5.17E-17 | 1.19E-15 |
| CYP8B1    | 0.109427 | 0.177061  | 0.694284 | 0.00012  | 0.000464 |
| DOCK8     | 0.69758  | 1.658114  | 1.249112 | 8.40E-31 | 3.89E-29 |
| CFAP99    | 0.177755 | 0.118769  | -0.58173 | 0.004106 | 0.010018 |
| CADM4     | 13.50766 | 8.919421  | -0.59876 | 1.49E-05 | 7.43E-05 |
| CD6       | 0.742294 | 1.276148  | 0.781734 | 1.24E-20 | 3.32E-19 |
| PODXL     | 43.53409 | 29.06244  | -0.58299 | 2.22E-05 | 0.000105 |
| CXCL10    | 28.47221 | 98.65058  | 1.792773 | 1.22E-28 | 4.89E-27 |
| MTTP      | 0.164397 | 0.066699  | -1.30145 | 3.40E-07 | 2.55E-06 |
| CD1B      | 0.03309  | 0.253548  | 2.937785 | 2.93E-24 | 9.44E-23 |
| NLRC5     | 1.376828 | 2.565141  | 0.89769  | 7.10E-17 | 1.62E-15 |
| EFHB      | 0.619253 | 0.298347  | -1.05354 | 1.13E-06 | 7.54E-06 |
| OTUD7A    | 0.156943 | 0.098647  | -0.66989 | 0.003571 | 0.008883 |
| ECEL1     | 6.184414 | 1.711738  | -1.85317 | 8.79E-05 | 0.000354 |
| KCNIP4    | 1.02835  | 0.568651  | -0.85471 | 3.93E-07 | 2.91E-06 |
| ECT2L     | 0.12336  | 0.077824  | -0.66459 | 0.000198 | 0.000725 |
| ADAM33    | 2.479394 | 1.482305  | -0.74215 | 0.011169 | 0.023654 |
| CHSY3     | 0.410891 | 0.769818  | 0.905763 | 8.27E-08 | 7.09E-07 |
| SLC38A3   | 1.920178 | 1.077617  | -0.8334  | 1.20E-05 | 6.11E-05 |
| ADAMTS4   | 0.799435 | 1.28621   | 0.686075 | 3.48E-08 | 3.19E-07 |
| TRPV2     | 1.375962 | 3.080719  | 1.162827 | 1.27E-38 | 9.75E-37 |
| CCDC114   | 2.628995 | 1.617862  | -0.70042 | 5.53E-05 | 0.000235 |
| FCGR3B    | 0.111653 | 0.454821  | 2.026278 | 3.00E-15 | 6.21E-14 |
| DDX25     | 0.439351 | 0.121577  | -1.8535  | 1.74E-11 | 2.57E-10 |
| S100A9    | 98.33578 | 173.9878  | 0.823198 | 2.10E-16 | 4.66E-15 |
| LACC1     | 0.891328 | 1.421368  | 0.673252 | 2.76E-17 | 6.39E-16 |
| P2RY14    | 0.164634 | 0.299131  | 0.861513 | 1.29E-20 | 3.43E-19 |
| BTBD17    | 1.008918 | 0.059433  | -4.0854  | 4.54E-08 | 4.08E-07 |
| TRAT1     | 0.090361 | 0.465619  | 2.365371 | 8.66E-42 | 9.23E-40 |
| INMT      | 0.534062 | 0.850168  | 0.670741 | 2.65E-06 | 1.60E-05 |
| POU2AF1   | 0.527898 | 0.888698  | 0.751435 | 0.000226 | 0.000811 |
| TTC9      | 3.997421 | 6.162218  | 0.62438  | 7.69E-06 | 4.14E-05 |
| CD79A     | 2.020095 | 6.621579  | 1.712752 | 1.78E-15 | 3.74E-14 |
| MACROH2A2 | 30.33885 | 19.92649  | -0.60648 | 8.95E-09 | 9.28E-08 |
| ECM2      | 1.044341 | 1.792612  | 0.779471 | 1.34E-06 | 8.75E-06 |
| ALPK2     | 0.198374 | 0.311253  | 0.649864 | 1.22E-08 | 1.23E-07 |
| CDH2      | 20.62138 | 11.1847   | -0.88261 | 3.37E-07 | 2.53E-06 |

| Gene     | conMean  | treatMean | logFC    | pValue   | FDR      |
|----------|----------|-----------|----------|----------|----------|
| SLC11A1  | 1.192407 | 2.331601  | 0.967444 | 1.30E-20 | 3.45E-19 |
| IL10RA   | 1.203264 | 3.962055  | 1.719296 | 2.29E-43 | 3.12E-41 |
| WNT2B    | 0.849125 | 0.445556  | -0.93037 | 3.78E-06 | 2.20E-05 |
| SLC15A3  | 6.959623 | 12.20552  | 0.810453 | 1.20E-17 | 2.84E-16 |
| EFNA3    | 6.792371 | 4.246122  | -0.67777 | 1.50E-06 | 9.63E-06 |
| APLNR    | 1.835241 | 2.967301  | 0.693182 | 1.18E-06 | 7.80E-06 |
| P2RY6    | 2.021077 | 3.771577  | 0.900044 | 2.83E-22 | 8.25E-21 |
| PTPN5    | 0.227629 | 0.111929  | -1.02409 | 8.24E-06 | 4.40E-05 |
| KLRD1    | 0.078295 | 0.168413  | 1.105012 | 6.52E-21 | 1.75E-19 |
| DERL3    | 4.429797 | 7.354144  | 0.731317 | 4.23E-09 | 4.70E-08 |
| SLC35G6  | 0.142091 | 0.088043  | -0.69054 | 0.003782 | 0.009327 |
| CCL19    | 0.460156 | 2.838962  | 2.625168 | 1.42E-26 | 5.09E-25 |
| TIGD3    | 0.876645 | 0.242334  | -1.855   | 0.000402 | 0.001341 |
| CCDC40   | 1.899747 | 0.977405  | -0.95878 | 8.30E-10 | 1.02E-08 |
| ASTN1    | 1.601887 | 0.50647   | -1.66122 | 8.28E-07 | 5.72E-06 |
| C10orf99 | 2.902599 | 10.12031  | 1.801836 | 0.025184 | 0.04701  |
| NSG1     | 18.15058 | 11.0012   | -0.72236 | 6.87E-08 | 5.99E-07 |
| SCG3     | 1.024408 | 0.072187  | -3.82691 | 0.008158 | 0.01807  |
| IL27     | 0.072506 | 0.190509  | 1.393697 | 1.98E-23 | 6.06E-22 |
| PPM1H    | 4.924819 | 3.203208  | -0.62055 | 1.36E-06 | 8.88E-06 |
| PKIB     | 0.998017 | 1.947519  | 0.964501 | 6.05E-22 | 1.72E-20 |
| VCAN     | 4.726162 | 9.456048  | 1.000568 | 2.02E-10 | 2.66E-09 |
| APOBR    | 0.83848  | 2.213523  | 1.400497 | 5.13E-34 | 2.93E-32 |
| TFF1     | 2.05634  | 0.168682  | -3.6077  | 3.18E-05 | 0.000145 |
| FOLR2    | 5.446931 | 10.98388  | 1.011872 | 6.97E-20 | 1.78E-18 |
| APOL6    | 4.806399 | 10.14201  | 1.077316 | 7.60E-24 | 2.38E-22 |
| CACNG8   | 0.128522 | 0.080606  | -0.67306 | 0.00112  | 0.003249 |
| FGF19    | 2.019781 | 0.353643  | -2.51383 | 1.02E-15 | 2.18E-14 |
| ZBBX     | 0.804709 | 0.310353  | -1.37456 | 8.64E-07 | 5.93E-06 |
| HPSE     | 2.223227 | 4.257248  | 0.937266 | 2.11E-19 | 5.29E-18 |
| SSC5D    | 2.00459  | 3.091967  | 0.625218 | 1.97E-06 | 1.23E-05 |
| SQOR     | 4.412259 | 7.973501  | 0.853696 | 1.42E-22 | 4.20E-21 |

**Table S3.** The results of genomic instability-related differentially expressed genes (DEGs).

| Gene     | conMean  | treatMean | logFC    | pValue   | FDR      |
|----------|----------|-----------|----------|----------|----------|
| ABCA6    | 0.073568 | 0.153095  | 1.057285 | 3.78E-07 | 0.004791 |
| BAG2     | 1.871568 | 2.968229  | 0.665355 | 0.000143 | 0.025939 |
| C16orf54 | 0.398591 | 0.634058  | 0.669706 | 0.00046  | 0.035186 |
| HTRA4    | 0.102753 | 0.175708  | 0.774001 | 0.00018  | 0.025939 |
| DRP2     | 0.114444 | 0.179498  | 0.649329 | 0.001276 | 0.047277 |
| THPO     | 0.098318 | 0.228955  | 1.219533 | 3.10E-05 | 0.021617 |
| LRRN4CL  | 0.979332 | 1.767611  | 0.851931 | 0.000627 | 0.03715  |
| ISLR2    | 0.409441 | 1.161227  | 1.50392  | 0.00068  | 0.038474 |
| GPR1     | 0.421521 | 0.820762  | 0.961359 | 0.001442 | 0.049442 |

| Gene     | conMean  | treatMean | logFC    | pValue   | FDR      |
|----------|----------|-----------|----------|----------|----------|
| GABRR2   | 0.10977  | 0.192329  | 0.809092 | 0.000935 | 0.042313 |
| FBXL22   | 0.718556 | 1.134047  | 0.658308 | 0.00068  | 0.038474 |
| CNTN1    | 0.993437 | 1.889137  | 0.927226 | 0.000702 | 0.039194 |
| FAM155A  | 0.155882 | 0.289977  | 0.895487 | 0.000297 | 0.03038  |
| ALDH3B1  | 10.80585 | 7.051223  | -0.61587 | 0.000242 | 0.027887 |
| BASP1    | 10.3636  | 20.29371  | 0.969508 | 5.92E-06 | 0.020383 |
| ITGA8    | 0.194544 | 0.342038  | 0.81406  | 0.000106 | 0.025939 |
| B3GALT1  | 0.305479 | 0.777849  | 1.348415 | 0.000302 | 0.030653 |
| NR5A2    | 0.187769 | 0.368382  | 0.972246 | 2.79E-05 | 0.021617 |
| HEPH     | 1.014766 | 1.803658  | 0.829778 | 0.000168 | 0.025939 |
| HIC1     | 1.151464 | 1.895696  | 0.719259 | 0.000156 | 0.025939 |
| IGSF23   | 0.732768 | 1.79737   | 1.294458 | 0.000669 | 0.038474 |
| HOXC8    | 0.642026 | 0.987821  | 0.621618 | 0.000598 | 0.036407 |
| ABCA9    | 0.140587 | 0.286594  | 1.027543 | 6.14E-05 | 0.024699 |
| ADAMDEC1 | 1.14333  | 2.915914  | 1.350706 | 0.00141  | 0.049201 |
| DLX6     | 0.632645 | 1.216751  | 0.943566 | 2.06E-05 | 0.021617 |
| PTPRO    | 0.3804   | 0.598842  | 0.654657 | 0.000346 | 0.032985 |
| HOPX     | 1.855224 | 3.392268  | 0.870657 | 6.31E-05 | 0.024699 |
| TMEM200A | 0.683953 | 1.062299  | 0.63522  | 4.59E-05 | 0.021948 |
| LHFPL6   | 5.262816 | 7.909948  | 0.587833 | 0.000226 | 0.027887 |
| TSHR     | 0.299511 | 0.520257  | 0.796615 | 0.000691 | 0.038752 |
| AOC3     | 1.05138  | 2.566121  | 1.287305 | 0.000215 | 0.027887 |
| COPZ2    | 3.856309 | 5.765573  | 0.580243 | 0.000824 | 0.040625 |
| RGS4     | 1.605362 | 2.850719  | 0.828427 | 0.000396 | 0.033898 |
| LMOD1    | 1.959397 | 3.454712  | 0.818156 | 0.001464 | 0.049442 |
| MS4A1    | 0.096875 | 0.276769  | 1.514482 | 0.001058 | 0.045062 |
| THSD1    | 0.427892 | 0.701923  | 0.714067 | 2.29E-05 | 0.021617 |
| PABPC5   | 0.151924 | 0.247648  | 0.704936 | 0.000761 | 0.039194 |
| COLCA2   | 3.295163 | 1.492438  | -1.14268 | 4.50E-05 | 0.021948 |
| PTGDR    | 0.083365 | 0.127715  | 0.615405 | 0.00068  | 0.038474 |
| DNMT3B   | 2.302009 | 3.500641  | 0.604726 | 0.000714 | 0.039194 |
| PLAAT3   | 16.30328 | 10.33384  | -0.65779 | 0.000452 | 0.035186 |
| APOBEC3A | 0.453104 | 0.794246  | 0.809744 | 0.000569 | 0.035702 |
| KRTAP5-1 | 0.284923 | 0.485633  | 0.769294 | 0.000317 | 0.031381 |
| MEIS3    | 1.015547 | 1.590484  | 0.647208 | 0.00018  | 0.025939 |
| CCR4     | 0.148563 | 0.256241  | 0.786427 | 0.00092  | 0.042313 |
| NEXN     | 1.291451 | 2.273901  | 0.816177 | 3.51E-05 | 0.021617 |
| PLN      | 0.40556  | 1.117003  | 1.461646 | 0.000516 | 0.035186 |
| CHRD     | 0.402683 | 1.067982  | 1.40717  | 4.68E-05 | 0.021948 |
| GRAMD2A  | 5.353905 | 2.851307  | -0.90897 | 0.000864 | 0.04179  |
| ZNF804A  | 0.082811 | 0.128859  | 0.637891 | 0.00034  | 0.032929 |
| PRDM8    | 0.180753 | 0.292854  | 0.696161 | 0.000508 | 0.035186 |
| EBF1     | 0.736895 | 1.108774  | 0.589434 | 0.00037  | 0.033898 |
| CCDC150  | 0.254527 | 0.381241  | 0.582888 | 0.000638 | 0.03758  |
| ABCA10   | 0.068147 | 0.131455  | 0.947851 | 5.34E-05 | 0.024146 |

| Gene     | conMean  | treatMean | logFC    | pValue   | FDR      |
|----------|----------|-----------|----------|----------|----------|
| SRPX2    | 3.045338 | 4.914691  | 0.690498 | 0.000278 | 0.029828 |
| NUGGC    | 0.181753 | 0.323501  | 0.83179  | 0.000146 | 0.025939 |
| RSPO3    | 4.00966  | 8.140341  | 1.021609 | 0.000598 | 0.036407 |
| MCTP1    | 0.185913 | 0.318117  | 0.774932 | 0.000174 | 0.025939 |
| PIWIL1   | 0.347224 | 0.180708  | -0.9422  | 0.001101 | 0.045366 |
| LILRA5   | 0.415453 | 0.637904  | 0.618654 | 0.000508 | 0.035186 |
| BVES     | 0.500843 | 0.91978   | 0.876931 | 0.00106  | 0.045062 |
| SOCS2    | 0.424843 | 0.647862  | 0.608757 | 0.000499 | 0.035186 |
| AP1S2    | 4.979498 | 7.577374  | 0.605698 | 0.000165 | 0.025939 |
| TCEAL7   | 0.962932 | 1.768394  | 0.876934 | 0.000177 | 0.025939 |
| RASGRF2  | 0.39825  | 0.723309  | 0.860938 | 1.61E-05 | 0.021617 |
| TLR4     | 0.962682 | 1.566563  | 0.702471 | 0.000607 | 0.036825 |
| PTGIR    | 0.609934 | 0.933324  | 0.613725 | 0.000749 | 0.039194 |
| IRF4     | 0.241893 | 0.563712  | 1.22059  | 0.000467 | 0.035186 |
| MN1      | 1.063668 | 2.009895  | 0.918073 | 0.001442 | 0.049442 |
| P2RY8    | 0.351589 | 0.59853   | 0.767533 | 0.001336 | 0.048155 |
| GASK1B   | 2.460857 | 4.033687  | 0.712938 | 9.64E-05 | 0.025939 |
| TM6SF1   | 0.452484 | 0.678328  | 0.584115 | 0.000154 | 0.025939 |
| DDX43    | 0.198547 | 0.359772  | 0.857606 | 0.000227 | 0.027887 |
| GRIP2    | 0.087939 | 0.136852  | 0.638039 | 0.000297 | 0.03038  |
| FMN1     | 0.626164 | 0.39468   | -0.66586 | 0.000579 | 0.035933 |
| C5AR2    | 0.116009 | 0.191419  | 0.722495 | 0.00043  | 0.035186 |
| PLA2G4C  | 0.319072 | 0.533613  | 0.741909 | 6.44E-06 | 0.020383 |
| KRT18    | 339.6823 | 220.3003  | -0.62471 | 0.000222 | 0.027887 |
| DLX5     | 1.709954 | 3.407078  | 0.994578 | 0.001257 | 0.047277 |
| KMO      | 0.176186 | 0.26654   | 0.597253 | 0.000154 | 0.025939 |
| PECAM1   | 5.009312 | 7.510537  | 0.584304 | 8.48E-05 | 0.025939 |
| DCN      | 16.67818 | 32.87781  | 0.979153 | 0.000162 | 0.025939 |
| SMTN     | 3.724159 | 5.603823  | 0.589497 | 3.45E-05 | 0.021617 |
| LILRB1   | 0.900975 | 1.403718  | 0.639694 | 0.000851 | 0.041291 |
| CLEC7A   | 1.469858 | 2.206266  | 0.585931 | 0.001464 | 0.049442 |
| DACT1    | 1.079059 | 1.784007  | 0.725348 | 0.000238 | 0.027887 |
| PRDM1    | 1.492242 | 2.29517   | 0.621119 | 2.79E-05 | 0.021617 |
| TPSAB1   | 1.197822 | 2.805579  | 1.227885 | 0.001509 | 0.049806 |
| ZEB2     | 0.642159 | 1.064216  | 0.72879  | 8.64E-05 | 0.025939 |
| CNRIP1   | 1.232433 | 2.00358   | 0.701071 | 9.30E-05 | 0.025939 |
| ADCY8    | 1.977819 | 0.446162  | -2.14827 | 0.000557 | 0.035632 |
| CALHM5   | 0.264562 | 0.395891  | 0.581498 | 0.000136 | 0.025939 |
| COMP     | 8.370188 | 19.54503  | 1.22347  | 0.000215 | 0.027887 |
| ADAMTS2  | 2.699479 | 5.042421  | 0.901436 | 0.000761 | 0.039194 |
| CXorf21  | 0.583227 | 0.896805  | 0.620737 | 0.000452 | 0.035186 |
| GAS2L2   | 1.113716 | 0.336468  | -1.72684 | 0.001336 | 0.048155 |
| C2orf66  | 0.165719 | 0.400985  | 1.274805 | 0.001366 | 0.048334 |
| PRDM6    | 0.143541 | 0.284753  | 0.988246 | 0.001027 | 0.044882 |
| PDCD1LG2 | 0.767828 | 1.234667  | 0.685268 | 0.001464 | 0.049442 |
| ISLR     | 37.82174 | 66.78339  | 0.820273 | 0.001464 | 0.049442 |

| Gene       | conMean  | treatMean | logFC    | pValue   | FDR      |
|------------|----------|-----------|----------|----------|----------|
| LIN7B      | 0.921647 | 1.381543  | 0.583994 | 3.58E-05 | 0.021617 |
| SLAMF7     | 1.003057 | 1.943562  | 0.9543   | 0.00151  | 0.049806 |
| CELF4      | 0.856801 | 1.468579  | 0.77739  | 0.000283 | 0.029828 |
| TBX4       | 0.214657 | 0.093738  | -1.19533 | 0.001442 | 0.049442 |
| HMGCS1     | 5.844693 | 9.453881  | 0.693779 | 0.000389 | 0.033898 |
| KLF2       | 7.938779 | 14.19716  | 0.838613 | 0.001182 | 0.04649  |
| CCL11      | 2.325847 | 4.560231  | 0.971351 | 0.000177 | 0.025939 |
| UCN2       | 0.128902 | 0.194894  | 0.596419 | 0.001396 | 0.048854 |
| GATA2      | 1.414965 | 3.528868  | 1.318439 | 0.000551 | 0.035433 |
| FCAR       | 0.118583 | 0.231763  | 0.966749 | 0.000162 | 0.025939 |
| SMOC2      | 5.065162 | 10.1645   | 1.004859 | 5.54E-05 | 0.024207 |
| FAT4       | 0.240694 | 0.387195  | 0.685857 | 0.000491 | 0.035186 |
| INHBA      | 2.505063 | 4.399989  | 0.812653 | 0.001027 | 0.044882 |
| RUNX1T1    | 0.284083 | 0.506174  | 0.833321 | 0.001276 | 0.047277 |
| FILIP1L    | 4.255818 | 6.884143  | 0.693841 | 0.000445 | 0.035186 |
| S1PR1      | 2.339318 | 3.614838  | 0.627843 | 7.88E-05 | 0.025613 |
| LPAR4      | 0.152594 | 0.277695  | 0.863804 | 0.000164 | 0.025939 |
| SGCD       | 0.741476 | 1.252697  | 0.756565 | 0.000516 | 0.035186 |
| RAMP3      | 1.725748 | 2.599243  | 0.59087  | 0.000377 | 0.033898 |
| AC005020.2 | 0.144039 | 0.080511  | -0.8392  | 0.000565 | 0.035702 |
| ACSM5      | 0.088057 | 0.167412  | 0.926893 | 0.001487 | 0.049442 |
| MRVI1      | 1.174131 | 2.39214   | 1.026708 | 0.000113 | 0.025939 |
| SYNPO2     | 1.007912 | 1.802913  | 0.83896  | 0.000508 | 0.035186 |
| CCN4       | 1.584092 | 3.327142  | 1.070627 | 0.000824 | 0.040625 |
| IGFBP5     | 56.18184 | 90.81863  | 0.692885 | 0.001077 | 0.045313 |
| ADAMTS5    | 0.86766  | 1.301873  | 0.585387 | 0.00106  | 0.045062 |
| FNDC1      | 3.837628 | 8.265516  | 1.10689  | 0.000935 | 0.042313 |
| IL10       | 0.808762 | 1.371465  | 0.761931 | 0.001163 | 0.046062 |
| CDK5R2     | 0.172358 | 0.499301  | 1.534503 | 0.000949 | 0.042678 |
| TKTL1      | 2.495043 | 4.119322  | 0.723342 | 0.001392 | 0.048854 |
| PDGFRA     | 1.919995 | 3.370462  | 0.811844 | 0.000824 | 0.040625 |
| ANTXR2     | 1.101384 | 1.747057  | 0.665609 | 0.000151 | 0.025939 |
| CDH18      | 0.459361 | 0.930383  | 1.018198 | 0.00127  | 0.047277 |
| GLIPR1     | 1.709011 | 2.555567  | 0.580482 | 3.01E-05 | 0.021617 |
| C11orf96   | 5.730507 | 10.80138  | 0.914481 | 0.000508 | 0.035186 |
| SEMA3C     | 5.413156 | 8.723142  | 0.688378 | 0.000669 | 0.038474 |
| LAX1       | 0.175836 | 0.380951  | 1.115376 | 0.000177 | 0.025939 |
| LEP        | 0.04492  | 0.214927  | 2.258411 | 0.000187 | 0.026267 |
| B3GALNT1   | 7.639634 | 11.88289  | 0.637311 | 0.000136 | 0.025939 |
| OR51E1     | 0.145885 | 0.218265  | 0.581248 | 0.001464 | 0.049442 |
| CHSY3      | 0.377194 | 0.7149    | 0.922435 | 0.001219 | 0.046785 |
| ADAMTS4    | 0.811358 | 1.470083  | 0.857488 | 0.001378 | 0.048489 |
| P2RY14     | 0.163678 | 0.247332  | 0.595588 | 0.000438 | 0.035186 |
| ECM2       | 1.030611 | 1.641632  | 0.671631 | 0.000569 | 0.035702 |
| CCL19      | 1.200432 | 2.343964  | 0.965397 | 0.000533 | 0.035186 |

| Gene  | conMean  | treatMean | logFC    | pValue   | FDR      |
|-------|----------|-----------|----------|----------|----------|
| VCAN  | 5.329961 | 9.191833  | 0.786227 | 0.000483 | 0.035186 |
| KRT86 | 3.650036 | 1.475129  | -1.30707 | 0.000935 | 0.042313 |

**Table S4.** Enriched gene sets.

| Gene sets | Description                                                     | ES    | NES   | pvalue | FDR   |
|-----------|-----------------------------------------------------------------|-------|-------|--------|-------|
| KEGG      | KEGG_NOD_LIKE_RECEPTOR_SIGNALING_PATHWAY                        | 0.766 | 2.482 | 0.000  | 0.000 |
| KEGG      | KEGG_TOLL_LIKE_RECEPTOR_SIGNALING_PATHWAY                       | 0.758 | 2.456 | 0.000  | 0.000 |
| KEGG      | KEGG_CYTOSOLIC_DNA_SENSING_PATHWAY                              | 0.761 | 2.451 | 0.000  | 0.000 |
| KEGG      | KEGG_CHEMOKINE_SIGNALING_PATHWAY                                | 0.668 | 2.396 | 0.000  | 0.000 |
| KEGG      | KEGG_NATURAL_KILLER_CELL_MEDIATED_CYTOTOXICITY                  | 0.719 | 2.393 | 0.000  | 0.000 |
| KEGG      | KEGG_ANTIGEN_PROCESSING_AND_PRESENTATION                        | 0.816 | 2.385 | 0.000  | 0.000 |
| KEGG      | KEGG_CYTOKINE_CYTOKINE_RECEPTOR_INTERACTION                     | 0.661 | 2.376 | 0.000  | 0.000 |
| KEGG      | KEGG_RIG_I_LIKE_RECEPTOR_SIGNALING_PATHWAY                      | 0.703 | 2.358 | 0.000  | 0.000 |
| KEGG      | KEGG_LEISHMANIA_INFECTION                                       | 0.830 | 2.348 | 0.000  | 0.000 |
| KEGG      | KEGG_AUTOIMMUNE_THYROID_DISEASE                                 | 0.840 | 2.292 | 0.000  | 0.000 |
| KEGG      | KEGG_INTESTINAL_IMMUNE_NETWORK_FOR_IGA_PRODUCTION               | 0.868 | 2.289 | 0.000  | 0.000 |
| KEGG      | KEGG_LYSOSOME                                                   | 0.658 | 2.285 | 0.000  | 0.000 |
| KEGG      | KEGG_CELL_ADHESION_MOLECULES_CAMS                               | 0.698 | 2.285 | 0.000  | 0.000 |
| KEGG      | KEGG_B_CELL_RECEPTOR_SIGNALING_PATHWAY                          | 0.683 | 2.281 | 0.000  | 0.000 |
| KEGG      | KEGG_HEMATOPOIETIC_CELL_LINEAGE                                 | 0.728 | 2.276 | 0.000  | 0.000 |
| KEGG      | KEGG_VIRAL_MYOCARDITIS                                          | 0.719 | 2.260 | 0.000  | 0.000 |
| KEGG      | KEGG_PRIMARY_IMMUNODEFICIENCY                                   | 0.867 | 2.235 | 0.000  | 0.000 |
| KEGG      | KEGG_T_CELL_RECEPTOR_SIGNALING_PATHWAY                          | 0.676 | 2.233 | 0.000  | 0.000 |
| KEGG      | KEGG_PROTEASOME                                                 | 0.810 | 2.202 | 0.000  | 0.000 |
| KEGG      | KEGG_TYPE_I_DIABETES_MELLITUS                                   | 0.868 | 2.197 | 0.000  | 0.000 |
| KEGG      | KEGG_EPITHELIAL_CELL_SIGNALING_IN_HELICOBACTER_PYLORI_INFECTION | 0.615 | 2.148 | 0.000  | 0.000 |
| KEGG      | KEGG_JAK_STAT_SIGNALING_PATHWAY                                 | 0.579 | 2.120 | 0.000  | 0.000 |
| KEGG      | KEGG_ALLOGRAFT_REJECTION                                        | 0.918 | 2.076 | 0.000  | 0.001 |

| Gene sets | Description                                          | ES    | NES   | pvalue | FDR   |
|-----------|------------------------------------------------------|-------|-------|--------|-------|
| KEGG      | KEGG_ASTHMA                                          | 0.833 | 2.069 | 0.000  | 0.001 |
| KEGG      | KEGG_APOPTOSIS                                       | 0.582 | 2.064 | 0.000  | 0.001 |
| KEGG      | KEGG_AMINO_SUGAR_AND_NUCLEOTI<br>DE_SUGAR_METABOLISM | 0.642 | 2.054 | 0.000  | 0.001 |
| KEGG      | KEGG_GRAFT_VERSUS_HOST_DISEASE                       | 0.890 | 2.048 | 0.000  | 0.001 |
| KEGG      | KEGG_FC_GAMMA_R_MEDIATED_PHAG<br>OCYTOSIS            | 0.567 | 1.997 | 0.002  | 0.002 |
| KEGG      | KEGG_CELL_CYCLE                                      | 0.592 | 1.966 | 0.000  | 0.003 |
| KEGG      | KEGG_PRION_DISEASES                                  | 0.593 | 1.915 | 0.000  | 0.007 |
| KEGG      | KEGG_CYSTEINE_AND_METHIONINE_M<br>ETABOLISM          | 0.571 | 1.889 | 0.000  | 0.010 |
| KEGG      | KEGG_LEUKOCYTE_TRANSENDOTHELI<br>AL_MIGRATION        | 0.526 | 1.887 | 0.004  | 0.010 |
| KEGG      | KEGG_SYSTEMIC_LUPUS_ERYTHEMAT<br>OSUS                | 0.607 | 1.872 | 0.004  | 0.011 |
| KEGG      | KEGG_PANCREATIC_CANCER                               | 0.530 | 1.837 | 0.004  | 0.017 |
| KEGG      | KEGG_ENDOCYTOSIS                                     | 0.475 | 1.825 | 0.004  | 0.019 |
| KEGG      | KEGG_NICOTINATE_AND_NICOTINAMI<br>DE_METABOLISM      | 0.577 | 1.799 | 0.004  | 0.023 |
| KEGG      | KEGG_FC_EPSILON_RI_SIGNALING_PAT<br>HWAY             | 0.491 | 1.797 | 0.008  | 0.023 |
| KEGG      | KEGG_SNARE_INTERACTIONS_IN_VESI<br>CULAR_TRANSPORT   | 0.535 | 1.784 | 0.011  | 0.025 |
| KEGG      | KEGG_ACUTE_MYELOID_LEUKEMIA                          | 0.526 | 1.780 | 0.008  | 0.026 |
| KEGG      | KEGG_PYRIMIDINE_METABOLISM                           | 0.472 | 1.770 | 0.010  | 0.028 |
| KEGG      | KEGG_P53_SIGNALING_PATHWAY                           | 0.482 | 1.767 | 0.010  | 0.028 |
| KEGG      | KEGG_PATHOGENIC_ESCHERICHIA_CO<br>LI_INFECTION       | 0.511 | 1.761 | 0.012  | 0.029 |
| KEGG      | KEGG_VIBRIO_CHOLERAЕ_INFECTION                       | 0.490 | 1.744 | 0.008  | 0.033 |
| KEGG      | KEGG_OOCYTE_MEIOSIS                                  | 0.474 | 1.743 | 0.012  | 0.033 |
| KEGG      | KEGG_UBIQUITIN_MEDIATED_PROTEOL<br>YSIS              | 0.453 | 1.691 | 0.015  | 0.048 |
| HALLMARK  | HALLMARK_INTERFERON_GAMMA_RES<br>PONSE               | 0.885 | 2.456 | 0.000  | 0.000 |
| HALLMARK  | HALLMARK_IL6_JAK_STAT3_SIGNALIN<br>G                 | 0.821 | 2.447 | 0.000  | 0.000 |
| HALLMARK  | HALLMARK_COMPLEMENT                                  | 0.685 | 2.417 | 0.000  | 0.000 |
| HALLMARK  | HALLMARK_ALLOGRAFT_REJECTION                         | 0.823 | 2.409 | 0.000  | 0.000 |
| HALLMARK  | HALLMARK_INFLAMMATORY_RESPON<br>SE                   | 0.771 | 2.388 | 0.000  | 0.000 |
| HALLMARK  | HALLMARK_UV_RESPONSE_UP                              | 0.588 | 2.309 | 0.000  | 0.000 |
| HALLMARK  | HALLMARK_TNFA_SIGNALING_VIA_NF<br>KB                 | 0.734 | 2.299 | 0.000  | 0.000 |
| HALLMARK  | HALLMARK_MTORC1_SIGNALING                            | 0.659 | 2.292 | 0.000  | 0.000 |
| HALLMARK  | HALLMARK_IL2_STAT5_SIGNALING                         | 0.617 | 2.288 | 0.000  | 0.000 |



| Gene sets | Description                                  | ES    | NES   | pvalue | FDR   |
|-----------|----------------------------------------------|-------|-------|--------|-------|
| HALLMARK  | HALLMARK_INTERFERON_ALPHA_RESP<br>ONSE       | 0.919 | 2.269 | 0.000  | 0.000 |
| HALLMARK  | HALLMARK_APOPTOSIS                           | 0.591 | 2.244 | 0.000  | 0.000 |
| HALLMARK  | HALLMARK_PI3K_AKT_MTOR_SIGNALI<br>NG         | 0.588 | 2.144 | 0.000  | 0.000 |
| HALLMARK  | HALLMARK_UNFOLDED_PROTEIN_RESP<br>ONSE       | 0.557 | 2.075 | 0.002  | 0.001 |
| HALLMARK  | HALLMARK_KRAS_SIGNALING_UP                   | 0.539 | 1.953 | 0.000  | 0.004 |
| HALLMARK  | HALLMARK_E2F_TARGETS                         | 0.680 | 1.940 | 0.006  | 0.004 |
| HALLMARK  | HALLMARK_G2M_CHECKPOINT                      | 0.633 | 1.934 | 0.006  | 0.004 |
| HALLMARK  | HALLMARK_REACTIVE_OXYGEN_SPECI<br>ES_PATHWAY | 0.577 | 1.869 | 0.004  | 0.009 |
| HALLMARK  | HALLMARK_P53_PATHWAY                         | 0.442 | 1.818 | 0.002  | 0.015 |
| HALLMARK  | HALLMARK_GLYCOLYSIS                          | 0.463 | 1.797 | 0.004  | 0.017 |
| HALLMARK  | HALLMARK_ANDROGEN_RESPONSE                   | 0.484 | 1.751 | 0.011  | 0.025 |
| HALLMARK  | HALLMARK_XENOBIOTIC_METABOLIS<br>M           | 0.431 | 1.745 | 0.006  | 0.024 |
| HALLMARK  | HALLMARK_FATTY_ACID_METABOLIS<br>M           | 0.467 | 1.711 | 0.010  | 0.031 |
| HALLMARK  | HALLMARK_PROTEIN_SECRETION                   | 0.505 | 1.705 | 0.025  | 0.031 |
| HALLMARK  | HALLMARK_CHOLESTEROL_HOMEOST<br>ASIS         | 0.488 | 1.705 | 0.026  | 0.030 |
| HALLMARK  | HALLMARK_HYPOXIA                             | 0.453 | 1.703 | 0.021  | 0.029 |
| HALLMARK  | HALLMARK_DNA_REPAIR                          | 0.455 | 1.659 | 0.028  | 0.037 |

**Table S5.** Differentially mutated genes between high- and low-APOBEC3A expression groups.

| Hugo_Symbol | High.APOBEC3A | Low.APOBEC3A | P.value | OR     | CI.up   | CI.low |
|-------------|---------------|--------------|---------|--------|---------|--------|
| PLCH1       | 12            | 1            | 0.003   | 12.703 | 549.635 | 1.829  |
| ATG9A       | 8             | 0            | 0.007   | Inf    | Inf     | 1.726  |
| MYO16       | 8             | 0            | 0.007   | Inf    | Inf     | 1.726  |
| ZSWIM8      | 8             | 0            | 0.007   | Inf    | Inf     | 1.726  |
| TSHZ3       | 12            | 2            | 0.011   | 6.310  | 59.236  | 1.363  |
| C19orf44    | 7             | 0            | 0.014   | Inf    | Inf     | 1.448  |
| GIGYF2      | 7             | 0            | 0.014   | Inf    | Inf     | 1.448  |
| MAN2A2      | 7             | 0            | 0.014   | Inf    | Inf     | 1.448  |
| PAPPA2      | 7             | 0            | 0.014   | Inf    | Inf     | 1.448  |
| SIDT2       | 7             | 0            | 0.014   | Inf    | Inf     | 1.448  |
| TRIO        | 7             | 0            | 0.014   | Inf    | Inf     | 1.448  |
| PRUNE2      | 18            | 6            | 0.017   | 3.221  | 10.268  | 1.173  |
| FAT4        | 2             | 10           | 0.019   | 0.184  | 0.890   | 0.019  |
| HIVEP3      | 9             | 1            | 0.019   | 9.303  | 412.708 | 1.257  |
| COL24A1     | 0             | 5            | 0.028   | 0.000  | 1.051   | 0.000  |
| DHX34       | 0             | 5            | 0.028   | 0.000  | 1.051   | 0.000  |
| MALT1       | 0             | 5            | 0.028   | 0.000  | 1.051   | 0.000  |

| Hugo_Symbol | High.APOBEC3A | Low.APOBEC3A | P.value | OR    | CI.up   | CI.low |
|-------------|---------------|--------------|---------|-------|---------|--------|
| PPFIA1      | 0             | 5            | 0.028   | 0.000 | 1.051   | 0.000  |
| TMPRSS2     | 0             | 5            | 0.028   | 0.000 | 1.051   | 0.000  |
| ZNF101      | 0             | 5            | 0.028   | 0.000 | 1.051   | 0.000  |
| CDH5        | 6             | 0            | 0.030   | Inf   | Inf     | 1.175  |
| CERCAM      | 6             | 0            | 0.030   | Inf   | Inf     | 1.175  |
| COL11A1     | 6             | 0            | 0.030   | Inf   | Inf     | 1.175  |
| COL14A1     | 6             | 0            | 0.030   | Inf   | Inf     | 1.175  |
| COL5A1      | 6             | 0            | 0.030   | Inf   | Inf     | 1.175  |
| IRF8        | 6             | 0            | 0.030   | Inf   | Inf     | 1.175  |
| ITIH1       | 6             | 0            | 0.030   | Inf   | Inf     | 1.175  |
| LRP4        | 6             | 0            | 0.030   | Inf   | Inf     | 1.175  |
| MC5R        | 6             | 0            | 0.030   | Inf   | Inf     | 1.175  |
| NRXN1       | 6             | 0            | 0.030   | Inf   | Inf     | 1.175  |
| PCDHB5      | 6             | 0            | 0.030   | Inf   | Inf     | 1.175  |
| PPP1R15A    | 6             | 0            | 0.030   | Inf   | Inf     | 1.175  |
| SLC9A4      | 6             | 0            | 0.030   | Inf   | Inf     | 1.175  |
| SVIL        | 10            | 2            | 0.034   | 5.175 | 49.516  | 1.072  |
| KANK1       | 1             | 7            | 0.035   | 0.134 | 1.067   | 0.003  |
| NUMA1       | 1             | 7            | 0.035   | 0.134 | 1.067   | 0.003  |
| DMD         | 8             | 1            | 0.036   | 8.205 | 368.488 | 1.074  |

### 1.2 Supplementary Figures

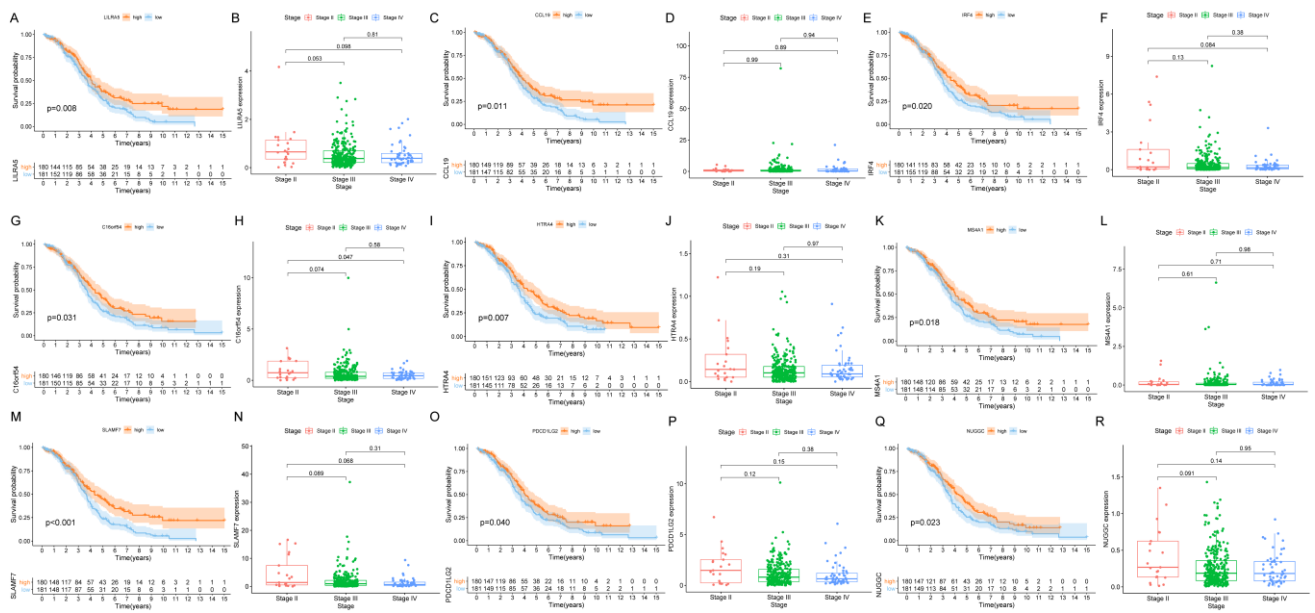

**Supplementary Figure 1. Correlation analysis of intersected DEGs with survival and clinicopathological characteristics of ovarian cancer (OC) patients. (A–C)** Distribution of gene expression in stage, by Kruskal–Wallis rank sum test. **(D–F)** Distribution of three kinds of scores in T

classification ( $p = 0.5, 0.84, 0.55$  for ImmuneScore, StromalScore, and ESTIMATEScore, respectively, by Kruskal–Wallis rank sum test). (G–I) Distribution of scores in M classification ( $p = 0.015, 0.014, 0.004$  for ImmuneScore, StromalScore, and ESTIMATEScore separately by Wilcoxon rank sum test). (J–L) Distribution of scores in N classification. Similar to the preceding,  $p = 0.56, 0.27, 0.40$ , respectively, with Wilcoxon rank sum test.
